# Supplementary material
Source: MDPI journal article supplement (https://www.mdpi.com/2071-1050/2/5/1182)
Supplement: s1 [file s1]

Archive with 5,282 entries (5,001 files):
- Sustainability_Altaweel_EtAl/Client/
- Sustainability_Altaweel_EtAl/Client/.classpath
- Sustainability_Altaweel_EtAl/Client/.project
- Sustainability_Altaweel_EtAl/Client/AIDA Client.launch
- Sustainability_Altaweel_EtAl/Client/bin/
- Sustainability_Altaweel_EtAl/Client/bin/anl/
- Sustainability_Altaweel_EtAl/Client/bin/anl/aida/
- Sustainability_Altaweel_EtAl/Client/bin/anl/aida/AIDADatasetProducer$AFDataFrame.class
- Sustainability_Altaweel_EtAl/Client/bin/anl/aida/AIDADatasetProducer$AFDataset.class
- Sustainability_Altaweel_EtAl/Client/bin/anl/aida/AIDADatasetProducer.class
- Sustainability_Altaweel_EtAl/Client/bin/anl/aida/algo/
- Sustainability_Altaweel_EtAl/Client/bin/anl/aida/algo/Cluster.class
- Sustainability_Altaweel_EtAl/Client/bin/anl/aida/algo/Clusterer.class
- Sustainability_Altaweel_EtAl/Client/bin/anl/aida/algo/ClusterResults.class
- Sustainability_Altaweel_EtAl/Client/bin/anl/aida/algo/Clusters.class
- Sustainability_Altaweel_EtAl/Client/bin/anl/aida/algo/ClustersBuilder$DefClusters.class
- Sustainability_Altaweel_EtAl/Client/bin/anl/aida/algo/ClustersBuilder.class
- Sustainability_Altaweel_EtAl/Client/bin/anl/aida/algo/ConceptClusterer.class
- Sustainability_Altaweel_EtAl/Client/bin/anl/aida/algo/ConceptGenerator.class
- Sustainability_Altaweel_EtAl/Client/bin/anl/aida/algo/ConceptGeneratorProducer.class
- Sustainability_Altaweel_EtAl/Client/bin/anl/aida/algo/DefaultConceptGenerator$ScoredKeywordImpl.class
- Sustainability_Altaweel_EtAl/Client/bin/anl/aida/algo/DefaultConceptGenerator.class
- Sustainability_Altaweel_EtAl/Client/bin/anl/aida/algo/DefaultScoredKeyword.class
- Sustainability_Altaweel_EtAl/Client/bin/anl/aida/algo/KeywordsConceptGeneratorProducer.class
- Sustainability_Altaweel_EtAl/Client/bin/anl/aida/algo/ScoredKeyword.class
- Sustainability_Altaweel_EtAl/Client/bin/anl/aida/algo/SimilarityCluster.class
- Sustainability_Altaweel_EtAl/Client/bin/anl/aida/algo/SVConceptGenerator.class
- Sustainability_Altaweel_EtAl/Client/bin/anl/aida/algo/SVConceptGeneratorProducer.class
- Sustainability_Altaweel_EtAl/Client/bin/anl/aida/bubble/
- Sustainability_Altaweel_EtAl/Client/bin/anl/aida/bubble/AbstractAxis$1.class
- Sustainability_Altaweel_EtAl/Client/bin/anl/aida/bubble/AbstractAxis.class
- Sustainability_Altaweel_EtAl/Client/bin/anl/aida/bubble/AbstractDomainAxis.class
- Sustainability_Altaweel_EtAl/Client/bin/anl/aida/bubble/AxisHighlight.class
- Sustainability_Altaweel_EtAl/Client/bin/anl/aida/bubble/Bubble$State.class
- Sustainability_Altaweel_EtAl/Client/bin/anl/aida/bubble/Bubble.class
- Sustainability_Altaweel_EtAl/Client/bin/anl/aida/bubble/BubbleChart$1.class
- Sustainability_Altaweel_EtAl/Client/bin/anl/aida/bubble/BubbleChart$2.class
- Sustainability_Altaweel_EtAl/Client/bin/anl/aida/bubble/BubbleChart$3.class
- Sustainability_Altaweel_EtAl/Client/bin/anl/aida/bubble/BubbleChart$4.class
- Sustainability_Altaweel_EtAl/Client/bin/anl/aida/bubble/BubbleChart$5.class
- Sustainability_Altaweel_EtAl/Client/bin/anl/aida/bubble/BubbleChart$6.class
- Sustainability_Altaweel_EtAl/Client/bin/anl/aida/bubble/BubbleChart$Category.class
- Sustainability_Altaweel_EtAl/Client/bin/anl/aida/bubble/BubbleChart$CategoryComparator.class
- Sustainability_Altaweel_EtAl/Client/bin/anl/aida/bubble/BubbleChart.class
- Sustainability_Altaweel_EtAl/Client/bin/anl/aida/bubble/BubbleConstants.class
- Sustainability_Altaweel_EtAl/Client/bin/anl/aida/bubble/BubbleData.class
- Sustainability_Altaweel_EtAl/Client/bin/anl/aida/bubble/BubbleDataset.class
- Sustainability_Altaweel_EtAl/Client/bin/anl/aida/bubble/BubbleLayer.class
- Sustainability_Altaweel_EtAl/Client/bin/anl/aida/bubble/BubblePlot$1.class
- Sustainability_Altaweel_EtAl/Client/bin/anl/aida/bubble/BubblePlot$2.class
- Sustainability_Altaweel_EtAl/Client/bin/anl/aida/bubble/BubblePlot$3.class
- Sustainability_Altaweel_EtAl/Client/bin/anl/aida/bubble/BubblePlot$Updater.class
- Sustainability_Altaweel_EtAl/Client/bin/anl/aida/bubble/BubblePlot.class
- Sustainability_Altaweel_EtAl/Client/bin/anl/aida/bubble/BubblePlotCreator.class
- Sustainability_Altaweel_EtAl/Client/bin/anl/aida/bubble/BubbleRenderer.class
- Sustainability_Altaweel_EtAl/Client/bin/anl/aida/bubble/BubbleSelectionListener.class
- Sustainability_Altaweel_EtAl/Client/bin/anl/aida/bubble/BubbleSlider$1.class
- Sustainability_Altaweel_EtAl/Client/bin/anl/aida/bubble/BubbleSlider$2.class
- Sustainability_Altaweel_EtAl/Client/bin/anl/aida/bubble/BubbleSlider$3.class
- Sustainability_Altaweel_EtAl/Client/bin/anl/aida/bubble/BubbleSlider.class
- Sustainability_Altaweel_EtAl/Client/bin/anl/aida/bubble/BubbleTooltip.class
- Sustainability_Altaweel_EtAl/Client/bin/anl/aida/bubble/DefaultBubbleDataset$CategoryEntry.class
- Sustainability_Altaweel_EtAl/Client/bin/anl/aida/bubble/DefaultBubbleDataset$CategoryIter.class
- Sustainability_Altaweel_EtAl/Client/bin/anl/aida/bubble/DefaultBubbleDataset.class
- Sustainability_Altaweel_EtAl/Client/bin/anl/aida/bubble/DefaultBubbleRenderer.class
- Sustainability_Altaweel_EtAl/Client/bin/anl/aida/bubble/DomainAxis.class
- Sustainability_Altaweel_EtAl/Client/bin/anl/aida/bubble/LogDomainAxis.class
- Sustainability_Altaweel_EtAl/Client/bin/anl/aida/bubble/NumericRange.class
- Sustainability_Altaweel_EtAl/Client/bin/anl/aida/bubble/RangeAxis.class
- Sustainability_Altaweel_EtAl/Client/bin/anl/aida/bubble/TickLocator.class
- Sustainability_Altaweel_EtAl/Client/bin/anl/aida/bubble/Zoomer.class
- Sustainability_Altaweel_EtAl/Client/bin/anl/aida/client/
- Sustainability_Altaweel_EtAl/Client/bin/anl/aida/client/actions/
- Sustainability_Altaweel_EtAl/Client/bin/anl/aida/client/actions/OpenCacheAction$1.class
- Sustainability_Altaweel_EtAl/Client/bin/anl/aida/client/actions/OpenCacheAction.class
- Sustainability_Altaweel_EtAl/Client/bin/anl/aida/client/actions/OpenTriggerDialog.class
- Sustainability_Altaweel_EtAl/Client/bin/anl/aida/client/AIDAClient.class
- Sustainability_Altaweel_EtAl/Client/bin/anl/aida/client/AIDAClientConfigurator.class
- Sustainability_Altaweel_EtAl/Client/bin/anl/aida/client/AIDAClientPlugin$1.class
- Sustainability_Altaweel_EtAl/Client/bin/anl/aida/client/AIDAClientPlugin.class
- Sustainability_Altaweel_EtAl/Client/bin/anl/aida/client/Cache.class
- Sustainability_Altaweel_EtAl/Client/bin/anl/aida/client/CacheDocumentSet.class
- Sustainability_Altaweel_EtAl/Client/bin/anl/aida/client/CacheElement$AllDocs.class
- Sustainability_Altaweel_EtAl/Client/bin/anl/aida/client/CacheElement$DIIter.class
- Sustainability_Altaweel_EtAl/Client/bin/anl/aida/client/CacheElement.class
- Sustainability_Altaweel_EtAl/Client/bin/anl/aida/client/DefaultKeyword.class
- Sustainability_Altaweel_EtAl/Client/bin/anl/aida/client/doc/
- Sustainability_Altaweel_EtAl/Client/bin/anl/aida/client/doc/AbstractDocumentsModel.class
- Sustainability_Altaweel_EtAl/Client/bin/anl/aida/client/doc/ClientDocument.class
- Sustainability_Altaweel_EtAl/Client/bin/anl/aida/client/doc/DefaultDocumentsModel$DocIterator.class
- Sustainability_Altaweel_EtAl/Client/bin/anl/aida/client/doc/DefaultDocumentsModel$DocSetsImpl.class
- Sustainability_Altaweel_EtAl/Client/bin/anl/aida/client/doc/DefaultDocumentsModel.class
- Sustainability_Altaweel_EtAl/Client/bin/anl/aida/client/doc/DocSetOperation.class
- Sustainability_Altaweel_EtAl/Client/bin/anl/aida/client/doc/DocSets.class
- Sustainability_Altaweel_EtAl/Client/bin/anl/aida/client/doc/DocTests.class
- Sustainability_Altaweel_EtAl/Client/bin/anl/aida/client/doc/DocumentContainer.class
- Sustainability_Altaweel_EtAl/Client/bin/anl/aida/client/doc/DocumentsModel.class
- Sustainability_Altaweel_EtAl/Client/bin/anl/aida/client/doc/SubsetDocumentsModel$DocIterator.class
- Sustainability_Altaweel_EtAl/Client/bin/anl/aida/client/doc/SubsetDocumentsModel$DocSetsImpl.class
- Sustainability_Altaweel_EtAl/Client/bin/anl/aida/client/doc/SubsetDocumentsModel.class
- Sustainability_Altaweel_EtAl/Client/bin/anl/aida/client/doc/WrappedDocumentsModel.class
- Sustainability_Altaweel_EtAl/Client/bin/anl/aida/client/DocSetID.class
- Sustainability_Altaweel_EtAl/Client/bin/anl/aida/client/gui/
- Sustainability_Altaweel_EtAl/Client/bin/anl/aida/client/gui/AddDocSetDialog$1.class
- Sustainability_Altaweel_EtAl/Client/bin/anl/aida/client/gui/AddDocSetDialog$2.class
- Sustainability_Altaweel_EtAl/Client/bin/anl/aida/client/gui/AddDocSetDialog.class
- Sustainability_Altaweel_EtAl/Client/bin/anl/aida/client/gui/AddDocSetDialog.jfd
- Sustainability_Altaweel_EtAl/Client/bin/anl/aida/client/gui/AIDADockableHelper.class
- Sustainability_Altaweel_EtAl/Client/bin/anl/aida/client/gui/AIDAGui$1.class
- Sustainability_Altaweel_EtAl/Client/bin/anl/aida/client/gui/AIDAGui$2.class
- Sustainability_Altaweel_EtAl/Client/bin/anl/aida/client/gui/AIDAGui$3.class
- Sustainability_Altaweel_EtAl/Client/bin/anl/aida/client/gui/AIDAGui$SearchWorker.class
- Sustainability_Altaweel_EtAl/Client/bin/anl/aida/client/gui/AIDAGui.class
- Sustainability_Altaweel_EtAl/Client/bin/anl/aida/client/gui/AIDAGuiConstants.class
- Sustainability_Altaweel_EtAl/Client/bin/anl/aida/client/gui/AIDAVisualization.class
- Sustainability_Altaweel_EtAl/Client/bin/anl/aida/client/gui/AIDAVisualizationAdapter.class
- Sustainability_Altaweel_EtAl/Client/bin/anl/aida/client/gui/AnimationConfigDialog$1.class
- Sustainability_Altaweel_EtAl/Client/bin/anl/aida/client/gui/AnimationConfigDialog$2.class
- Sustainability_Altaweel_EtAl/Client/bin/anl/aida/client/gui/AnimationConfigDialog$3.class
- Sustainability_Altaweel_EtAl/Client/bin/anl/aida/client/gui/AnimationConfigDialog.class
- Sustainability_Altaweel_EtAl/Client/bin/anl/aida/client/gui/AnimationConfigDialog.jfd
- Sustainability_Altaweel_EtAl/Client/bin/anl/aida/client/gui/BubbleConfigBean$AxisType.class
- Sustainability_Altaweel_EtAl/Client/bin/anl/aida/client/gui/BubbleConfigBean.class
- Sustainability_Altaweel_EtAl/Client/bin/anl/aida/client/gui/BubbleDialog$1.class
- Sustainability_Altaweel_EtAl/Client/bin/anl/aida/client/gui/BubbleDialog$2.class
- Sustainability_Altaweel_EtAl/Client/bin/anl/aida/client/gui/BubbleDialog$3.class
- Sustainability_Altaweel_EtAl/Client/bin/anl/aida/client/gui/BubbleDialog$4.class
- Sustainability_Altaweel_EtAl/Client/bin/anl/aida/client/gui/BubbleDialog$5.class
- Sustainability_Altaweel_EtAl/Client/bin/anl/aida/client/gui/BubbleDialog$6.class
- Sustainability_Altaweel_EtAl/Client/bin/anl/aida/client/gui/BubbleDialog$SourceItem.class
- Sustainability_Altaweel_EtAl/Client/bin/anl/aida/client/gui/BubbleDialog.class
- Sustainability_Altaweel_EtAl/Client/bin/anl/aida/client/gui/BubbleDialog.jfd
- Sustainability_Altaweel_EtAl/Client/bin/anl/aida/client/gui/CacheElementNode.class
- Sustainability_Altaweel_EtAl/Client/bin/anl/aida/client/gui/CacheNode.class
- Sustainability_Altaweel_EtAl/Client/bin/anl/aida/client/gui/CachePanel$CacheRenderer.class
- Sustainability_Altaweel_EtAl/Client/bin/anl/aida/client/gui/CachePanel.class
- Sustainability_Altaweel_EtAl/Client/bin/anl/aida/client/gui/CachePanel.jfd
- Sustainability_Altaweel_EtAl/Client/bin/anl/aida/client/gui/CachePropsPanel.class
- Sustainability_Altaweel_EtAl/Client/bin/anl/aida/client/gui/CachePropsPanel.jfd
- Sustainability_Altaweel_EtAl/Client/bin/anl/aida/client/gui/CacheTreePanel$1.class
- Sustainability_Altaweel_EtAl/Client/bin/anl/aida/client/gui/CacheTreePanel$2.class
- Sustainability_Altaweel_EtAl/Client/bin/anl/aida/client/gui/CacheTreePanel$Renderer.class
- Sustainability_Altaweel_EtAl/Client/bin/anl/aida/client/gui/CacheTreePanel.class
- Sustainability_Altaweel_EtAl/Client/bin/anl/aida/client/gui/CacheTreePanel.jfd
- Sustainability_Altaweel_EtAl/Client/bin/anl/aida/client/gui/CacheTSPanel$1.class
- Sustainability_Altaweel_EtAl/Client/bin/anl/aida/client/gui/CacheTSPanel.class
- Sustainability_Altaweel_EtAl/Client/bin/anl/aida/client/gui/CacheTSPanel.jfd
- Sustainability_Altaweel_EtAl/Client/bin/anl/aida/client/gui/ClusterPanel$1.class
- Sustainability_Altaweel_EtAl/Client/bin/anl/aida/client/gui/ClusterPanel$2.class
- Sustainability_Altaweel_EtAl/Client/bin/anl/aida/client/gui/ClusterPanel$3.class
- Sustainability_Altaweel_EtAl/Client/bin/anl/aida/client/gui/ClusterPanel$4.class
- Sustainability_Altaweel_EtAl/Client/bin/anl/aida/client/gui/ClusterPanel$ClusterWorker.class
- Sustainability_Altaweel_EtAl/Client/bin/anl/aida/client/gui/ClusterPanel.class
- Sustainability_Altaweel_EtAl/Client/bin/anl/aida/client/gui/ClusterPanel.jfd
- Sustainability_Altaweel_EtAl/Client/bin/anl/aida/client/gui/ClusterTableModel.class
- Sustainability_Altaweel_EtAl/Client/bin/anl/aida/client/gui/ConceptPanel$1.class
- Sustainability_Altaweel_EtAl/Client/bin/anl/aida/client/gui/ConceptPanel$2.class
- Sustainability_Altaweel_EtAl/Client/bin/anl/aida/client/gui/ConceptPanel$3.class
- Sustainability_Altaweel_EtAl/Client/bin/anl/aida/client/gui/ConceptPanel$4.class
- Sustainability_Altaweel_EtAl/Client/bin/anl/aida/client/gui/ConceptPanel$5.class
- Sustainability_Altaweel_EtAl/Client/bin/anl/aida/client/gui/ConceptPanel$6.class
- Sustainability_Altaweel_EtAl/Client/bin/anl/aida/client/gui/ConceptPanel$7.class
- Sustainability_Altaweel_EtAl/Client/bin/anl/aida/client/gui/ConceptPanel$ClusterWorker.class
- Sustainability_Altaweel_EtAl/Client/bin/anl/aida/client/gui/ConceptPanel.class
- Sustainability_Altaweel_EtAl/Client/bin/anl/aida/client/gui/ConceptPanel.jfd
- Sustainability_Altaweel_EtAl/Client/bin/anl/aida/client/gui/CreateTSWorker.class
- Sustainability_Altaweel_EtAl/Client/bin/anl/aida/client/gui/DocOpsWidget$OpAction.class
- Sustainability_Altaweel_EtAl/Client/bin/anl/aida/client/gui/DocOpsWidget.class
- Sustainability_Altaweel_EtAl/Client/bin/anl/aida/client/gui/DocSetNode.class
- Sustainability_Altaweel_EtAl/Client/bin/anl/aida/client/gui/DocsTabPanel$1.class
- Sustainability_Altaweel_EtAl/Client/bin/anl/aida/client/gui/DocsTabPanel$2.class
- Sustainability_Altaweel_EtAl/Client/bin/anl/aida/client/gui/DocsTabPanel$3.class
- Sustainability_Altaweel_EtAl/Client/bin/anl/aida/client/gui/DocsTabPanel$4.class
- Sustainability_Altaweel_EtAl/Client/bin/anl/aida/client/gui/DocsTabPanel$CloseAction.class
- Sustainability_Altaweel_EtAl/Client/bin/anl/aida/client/gui/DocsTabPanel.class
- Sustainability_Altaweel_EtAl/Client/bin/anl/aida/client/gui/DocsTabPanel.jfd
- Sustainability_Altaweel_EtAl/Client/bin/anl/aida/client/gui/DocumentsView$1.class
- Sustainability_Altaweel_EtAl/Client/bin/anl/aida/client/gui/DocumentsView$2.class
- Sustainability_Altaweel_EtAl/Client/bin/anl/aida/client/gui/DocumentsView$3.class
- Sustainability_Altaweel_EtAl/Client/bin/anl/aida/client/gui/DocumentsView$4.class
- Sustainability_Altaweel_EtAl/Client/bin/anl/aida/client/gui/DocumentsView$5.class
- Sustainability_Altaweel_EtAl/Client/bin/anl/aida/client/gui/DocumentsView$6.class
- Sustainability_Altaweel_EtAl/Client/bin/anl/aida/client/gui/DocumentsView$CopyAction.class
- Sustainability_Altaweel_EtAl/Client/bin/anl/aida/client/gui/DocumentsView.class
- Sustainability_Altaweel_EtAl/Client/bin/anl/aida/client/gui/DocumentsView.jfd
- Sustainability_Altaweel_EtAl/Client/bin/anl/aida/client/gui/FormulaListElement.class
- Sustainability_Altaweel_EtAl/Client/bin/anl/aida/client/gui/GraphOptionsPanel$1.class
- Sustainability_Altaweel_EtAl/Client/bin/anl/aida/client/gui/GraphOptionsPanel$2.class
- Sustainability_Altaweel_EtAl/Client/bin/anl/aida/client/gui/GraphOptionsPanel$3.class
- Sustainability_Altaweel_EtAl/Client/bin/anl/aida/client/gui/GraphOptionsPanel$4.class
- Sustainability_Altaweel_EtAl/Client/bin/anl/aida/client/gui/GraphOptionsPanel.class
- Sustainability_Altaweel_EtAl/Client/bin/anl/aida/client/gui/GraphOptionsPanel.jfd
- Sustainability_Altaweel_EtAl/Client/bin/anl/aida/client/gui/KeywordTableModel$Item.class
- Sustainability_Altaweel_EtAl/Client/bin/anl/aida/client/gui/KeywordTableModel.class
- Sustainability_Altaweel_EtAl/Client/bin/anl/aida/client/gui/ProgressLayer$ProgressLayerUI.class
- Sustainability_Altaweel_EtAl/Client/bin/anl/aida/client/gui/ProgressLayer.class
- Sustainability_Altaweel_EtAl/Client/bin/anl/aida/client/gui/ScatterDialog$1.class
- Sustainability_Altaweel_EtAl/Client/bin/anl/aida/client/gui/ScatterDialog$2.class
- Sustainability_Altaweel_EtAl/Client/bin/anl/aida/client/gui/ScatterDialog$3.class
- Sustainability_Altaweel_EtAl/Client/bin/anl/aida/client/gui/ScatterDialog$4.class
- Sustainability_Altaweel_EtAl/Client/bin/anl/aida/client/gui/ScatterDialog.class
- Sustainability_Altaweel_EtAl/Client/bin/anl/aida/client/gui/ScatterDialog.jfd
- Sustainability_Altaweel_EtAl/Client/bin/anl/aida/client/gui/SelectionListener.class
- Sustainability_Altaweel_EtAl/Client/bin/anl/aida/client/gui/StructuredDataPanel$1.class
- Sustainability_Altaweel_EtAl/Client/bin/anl/aida/client/gui/StructuredDataPanel$10.class
- Sustainability_Altaweel_EtAl/Client/bin/anl/aida/client/gui/StructuredDataPanel$11.class
- Sustainability_Altaweel_EtAl/Client/bin/anl/aida/client/gui/StructuredDataPanel$12.class
- Sustainability_Altaweel_EtAl/Client/bin/anl/aida/client/gui/StructuredDataPanel$13.class
- Sustainability_Altaweel_EtAl/Client/bin/anl/aida/client/gui/StructuredDataPanel$14.class
- Sustainability_Altaweel_EtAl/Client/bin/anl/aida/client/gui/StructuredDataPanel$15.class
- Sustainability_Altaweel_EtAl/Client/bin/anl/aida/client/gui/StructuredDataPanel$16.class
- Sustainability_Altaweel_EtAl/Client/bin/anl/aida/client/gui/StructuredDataPanel$17.class
- Sustainability_Altaweel_EtAl/Client/bin/anl/aida/client/gui/StructuredDataPanel$18.class
- Sustainability_Altaweel_EtAl/Client/bin/anl/aida/client/gui/StructuredDataPanel$2.class
- Sustainability_Altaweel_EtAl/Client/bin/anl/aida/client/gui/StructuredDataPanel$3.class
- Sustainability_Altaweel_EtAl/Client/bin/anl/aida/client/gui/StructuredDataPanel$4.class
- Sustainability_Altaweel_EtAl/Client/bin/anl/aida/client/gui/StructuredDataPanel$5.class
- Sustainability_Altaweel_EtAl/Client/bin/anl/aida/client/gui/StructuredDataPanel$6.class
- Sustainability_Altaweel_EtAl/Client/bin/anl/aida/client/gui/StructuredDataPanel$7.class
- Sustainability_Altaweel_EtAl/Client/bin/anl/aida/client/gui/StructuredDataPanel$8.class
- Sustainability_Altaweel_EtAl/Client/bin/anl/aida/client/gui/StructuredDataPanel$9.class
- Sustainability_Altaweel_EtAl/Client/bin/anl/aida/client/gui/StructuredDataPanel$FeedRenderer.class
- Sustainability_Altaweel_EtAl/Client/bin/anl/aida/client/gui/StructuredDataPanel$VariableRenderer.class
- Sustainability_Altaweel_EtAl/Client/bin/anl/aida/client/gui/StructuredDataPanel.class
- Sustainability_Altaweel_EtAl/Client/bin/anl/aida/client/gui/StructuredDataPanel.jfd
- Sustainability_Altaweel_EtAl/Client/bin/anl/aida/client/gui/TriggerDialog$1.class
- Sustainability_Altaweel_EtAl/Client/bin/anl/aida/client/gui/TriggerDialog$2.class
- Sustainability_Altaweel_EtAl/Client/bin/anl/aida/client/gui/TriggerDialog.class
- Sustainability_Altaweel_EtAl/Client/bin/anl/aida/client/gui/TriggerDialog.jfd
- Sustainability_Altaweel_EtAl/Client/bin/anl/aida/client/gui/TriggerPanel$1.class
- Sustainability_Altaweel_EtAl/Client/bin/anl/aida/client/gui/TriggerPanel$2.class
- Sustainability_Altaweel_EtAl/Client/bin/anl/aida/client/gui/TriggerPanel$3.class
- Sustainability_Altaweel_EtAl/Client/bin/anl/aida/client/gui/TriggerPanel$4.class
- Sustainability_Altaweel_EtAl/Client/bin/anl/aida/client/gui/TriggerPanel$TriggerNameRenderer.class
- Sustainability_Altaweel_EtAl/Client/bin/anl/aida/client/gui/TriggerPanel.class
- Sustainability_Altaweel_EtAl/Client/bin/anl/aida/client/gui/TriggerPanel.jfd
- Sustainability_Altaweel_EtAl/Client/bin/anl/aida/client/gui/TriggerRunnerWorker$1.class
- Sustainability_Altaweel_EtAl/Client/bin/anl/aida/client/gui/TriggerRunnerWorker.class
- Sustainability_Altaweel_EtAl/Client/bin/anl/aida/client/gui/VizDialog$1.class
- Sustainability_Altaweel_EtAl/Client/bin/anl/aida/client/gui/VizDialog$2.class
- Sustainability_Altaweel_EtAl/Client/bin/anl/aida/client/gui/VizDialog$3.class
- Sustainability_Altaweel_EtAl/Client/bin/anl/aida/client/gui/VizDialog.class
- Sustainability_Altaweel_EtAl/Client/bin/anl/aida/client/gui/VizDialog.jfd
- Sustainability_Altaweel_EtAl/Client/bin/anl/aida/client/gui/VizPropertyBean$Type$1.class
- Sustainability_Altaweel_EtAl/Client/bin/anl/aida/client/gui/VizPropertyBean$Type$2.class
- Sustainability_Altaweel_EtAl/Client/bin/anl/aida/client/gui/VizPropertyBean$Type$3.class
- Sustainability_Altaweel_EtAl/Client/bin/anl/aida/client/gui/VizPropertyBean$Type.class
- Sustainability_Altaweel_EtAl/Client/bin/anl/aida/client/gui/VizPropertyBean.class
- Sustainability_Altaweel_EtAl/Client/bin/anl/aida/client/io/
- Sustainability_Altaweel_EtAl/Client/bin/anl/aida/client/io/AlertFileIO.class
- Sustainability_Altaweel_EtAl/Client/bin/anl/aida/client/io/CacheFileReader$ItemsProcessor.class
- Sustainability_Altaweel_EtAl/Client/bin/anl/aida/client/io/CacheFileReader$KeywordProcessor.class
- Sustainability_Altaweel_EtAl/Client/bin/anl/aida/client/io/CacheFileReader$RangeProcessor.class
- Sustainability_Altaweel_EtAl/Client/bin/anl/aida/client/io/CacheFileReader$Switcher.class
- Sustainability_Altaweel_EtAl/Client/bin/anl/aida/client/io/CacheFileReader$XMLEventProcessor.class
- Sustainability_Altaweel_EtAl/Client/bin/anl/aida/client/io/CacheFileReader.class
- Sustainability_Altaweel_EtAl/Client/bin/anl/aida/client/io/CacheReaderTests.class
- Sustainability_Altaweel_EtAl/Client/bin/anl/aida/client/io/Imageable.class
- Sustainability_Altaweel_EtAl/Client/bin/anl/aida/client/io/ImageableComponent.class
- Sustainability_Altaweel_EtAl/Client/bin/anl/aida/client/io/ImageExportAction.class
- Sustainability_Altaweel_EtAl/Client/bin/anl/aida/client/io/ImageExporter$1.class
- Sustainability_Altaweel_EtAl/Client/bin/anl/aida/client/io/ImageExporter$ImageFileFilter.class
- Sustainability_Altaweel_EtAl/Client/bin/anl/aida/client/io/ImageExporter.class
- Sustainability_Altaweel_EtAl/Client/bin/anl/aida/client/Keyword.class
- Sustainability_Altaweel_EtAl/Client/bin/anl/aida/client/KeywordDocCountFilter.class
- Sustainability_Altaweel_EtAl/Client/bin/anl/aida/client/Keywords.class
- Sustainability_Altaweel_EtAl/Client/bin/anl/aida/client/net/
- Sustainability_Altaweel_EtAl/Client/bin/anl/aida/client/net/CGEdge.class
- Sustainability_Altaweel_EtAl/Client/bin/anl/aida/client/net/ConceptGraph.class
- Sustainability_Altaweel_EtAl/Client/bin/anl/aida/client/net/ConceptGraphBuilder.class
- Sustainability_Altaweel_EtAl/Client/bin/anl/aida/client/net/DefaultCGEdge.class
- Sustainability_Altaweel_EtAl/Client/bin/anl/aida/client/net/EdgeCreator.class
- Sustainability_Altaweel_EtAl/Client/bin/anl/aida/client/net/EdgeCreatorCreator.class
- Sustainability_Altaweel_EtAl/Client/bin/anl/aida/client/net/NetTests.class
- Sustainability_Altaweel_EtAl/Client/bin/anl/aida/client/net/NetworkOutputter.class
- Sustainability_Altaweel_EtAl/Client/bin/anl/aida/client/net/OccurenceEdgeCC.class
- Sustainability_Altaweel_EtAl/Client/bin/anl/aida/client/net/OccurrenceEdgeCreator.class
- Sustainability_Altaweel_EtAl/Client/bin/anl/aida/client/net/OccurrenceFilterCreator.class
- Sustainability_Altaweel_EtAl/Client/bin/anl/aida/client/net/ScorerThresholdEdgeCreator.class
- Sustainability_Altaweel_EtAl/Client/bin/anl/aida/client/net/SimilarityFilterCreator.class
- Sustainability_Altaweel_EtAl/Client/bin/anl/aida/client/net/SVEdgeCC.class
- Sustainability_Altaweel_EtAl/Client/bin/anl/aida/client/net/TermNode.class
- Sustainability_Altaweel_EtAl/Client/bin/anl/aida/client/net/TFEdgeCC.class
- Sustainability_Altaweel_EtAl/Client/bin/anl/aida/client/net/TFFilterCreator.class
- Sustainability_Altaweel_EtAl/Client/bin/anl/aida/client/net/TFIDFEdgeCC.class
- Sustainability_Altaweel_EtAl/Client/bin/anl/aida/client/net/TFIDFFilterCreator.class
- Sustainability_Altaweel_EtAl/Client/bin/anl/aida/client/net/TSConceptGraphs.class
- Sustainability_Altaweel_EtAl/Client/bin/anl/aida/client/net/TSFilterCreator.class
- Sustainability_Altaweel_EtAl/Client/bin/anl/aida/client/net/ValueGraphCreator.class
- Sustainability_Altaweel_EtAl/Client/bin/anl/aida/client/net/ValueNode.class
- Sustainability_Altaweel_EtAl/Client/bin/anl/aida/client/search/
- Sustainability_Altaweel_EtAl/Client/bin/anl/aida/client/search/LuceneSearcher.class
- Sustainability_Altaweel_EtAl/Client/bin/anl/aida/client/search/LuceneSearchTest.class
- Sustainability_Altaweel_EtAl/Client/bin/anl/aida/client/search/PathFilter.class
- Sustainability_Altaweel_EtAl/Client/bin/anl/aida/client/ShowDocViewOp.class
- Sustainability_Altaweel_EtAl/Client/bin/anl/aida/client/TempCacheDocSet$1.class
- Sustainability_Altaweel_EtAl/Client/bin/anl/aida/client/TempCacheDocSet.class
- Sustainability_Altaweel_EtAl/Client/bin/anl/aida/client/Test.class
- Sustainability_Altaweel_EtAl/Client/bin/anl/aida/client/util/
- Sustainability_Altaweel_EtAl/Client/bin/anl/aida/client/util/AppStarter.class
[truncated: 4,982 more entries]
