# Supplementary material
Source: MDPI journal article supplement (https://www.mdpi.com/2071-1050/2/5/1182)
Supplement: s1 [file s1 › Sustainability_Altaweel_EtAl/Client/AIDA Client.launch]

<?xml version="1.0" encoding="UTF-8" standalone="no"?>
<launchConfiguration type="org.eclipse.jdt.launching.localJavaApplication">
<stringAttribute key="bad_container_name" value="/Clien"/>
<listAttribute key="org.eclipse.debug.core.MAPPED_RESOURCE_PATHS">
<listEntry value="/Client/saf_runtime/saf.core.runtime.jar"/>
</listAttribute>
<listAttribute key="org.eclipse.debug.core.MAPPED_RESOURCE_TYPES">
<listEntry value="1"/>
</listAttribute>
<stringAttribute key="org.eclipse.debug.core.source_locator_id" value="org.eclipse.jdt.launching.sourceLocator.JavaSourceLookupDirector"/>
<stringAttribute key="org.eclipse.debug.core.source_locator_memento" value="&lt;?xml version=&quot;1.0&quot; encoding=&quot;UTF-8&quot;?&gt;&#10;&lt;sourceLookupDirector&gt;&#10;&lt;sourceContainers duplicates=&quot;false&quot;&gt;&#10;&lt;container memento=&quot;&amp;lt;?xml version=&amp;quot;1.0&amp;quot; encoding=&amp;quot;UTF-8&amp;quot;?&amp;gt;&amp;#10;&amp;lt;folder nest=&amp;quot;false&amp;quot; path=&amp;quot;/Server/src&amp;quot;/&amp;gt;&amp;#10;&quot; typeId=&quot;org.eclipse.debug.core.containerType.folder&quot;/&gt;&#10;&lt;container memento=&quot;&amp;lt;?xml version=&amp;quot;1.0&amp;quot; encoding=&amp;quot;UTF-8&amp;quot;?&amp;gt;&amp;#10;&amp;lt;folder nest=&amp;quot;false&amp;quot; path=&amp;quot;/Client/src&amp;quot;/&amp;gt;&amp;#10;&quot; typeId=&quot;org.eclipse.debug.core.containerType.folder&quot;/&gt;&#10;&lt;container memento=&quot;&amp;lt;?xml version=&amp;quot;1.0&amp;quot; encoding=&amp;quot;UTF-8&amp;quot;?&amp;gt;&amp;#10;&amp;lt;default/&amp;gt;&amp;#10;&quot; typeId=&quot;org.eclipse.debug.core.containerType.default&quot;/&gt;&#10;&lt;/sourceContainers&gt;&#10;&lt;/sourceLookupDirector&gt;&#10;"/>
<listAttribute key="org.eclipse.debug.ui.favoriteGroups">
<listEntry value="org.eclipse.debug.ui.launchGroup.debug"/>
<listEntry value="org.eclipse.debug.ui.launchGroup.run"/>
</listAttribute>
<listAttribute key="org.eclipse.jdt.launching.CLASSPATH">
<listEntry value="&lt;?xml version=&quot;1.0&quot; encoding=&quot;UTF-8&quot;?&gt;&#10;&lt;runtimeClasspathEntry containerPath=&quot;org.eclipse.jdt.launching.JRE_CONTAINER/org.eclipse.jdt.internal.launching.macosx.MacOSXType/JVM 1.6&quot; javaProject=&quot;Client&quot; path=&quot;1&quot; type=&quot;4&quot;/&gt;&#10;"/>
<listEntry value="&lt;?xml version=&quot;1.0&quot; encoding=&quot;UTF-8&quot;?&gt;&#10;&lt;runtimeClasspathEntry id=&quot;org.eclipse.jdt.launching.classpathentry.defaultClasspath&quot;&gt;&#10;&lt;memento exportedEntriesOnly=&quot;false&quot; project=&quot;Client&quot;/&gt;&#10;&lt;/runtimeClasspathEntry&gt;&#10;"/>
<listEntry value="&lt;?xml version=&quot;1.0&quot; encoding=&quot;UTF-8&quot;?&gt;&#10;&lt;runtimeClasspathEntry internalArchive=&quot;/Client/icons&quot; path=&quot;3&quot; type=&quot;2&quot;/&gt;&#10;"/>
</listAttribute>
<booleanAttribute key="org.eclipse.jdt.launching.DEFAULT_CLASSPATH" value="false"/>
<stringAttribute key="org.eclipse.jdt.launching.MAIN_TYPE" value="saf.core.runtime.Boot"/>
<stringAttribute key="org.eclipse.jdt.launching.PROGRAM_ARGUMENTS" value="../Client/Cache_Iowa/cache.xml"/>
<stringAttribute key="org.eclipse.jdt.launching.PROJECT_ATTR" value="Client"/>
<stringAttribute key="org.eclipse.jdt.launching.VM_ARGUMENTS" value="-Xmx640M -Danl.mifs.forceTRIM=false -Danl.mifs.jogl.debug=true"/>
</launchConfiguration>
