# Supplementary material
Source: MDPI journal article supplement (https://www.mdpi.com/2071-1050/2/5/1182)
Supplement: s1 [file s1 › Sustainability_Altaweel_EtAl/Client/bin/anl/aida/client/gui/GraphOptionsPanel.jfd]

<?xml version="1.0" encoding="UTF-8"?> 
<java version="1.6.0_07" class="java.beans.XMLDecoder"> 
 <object class="com.jformdesigner.model.FormModel"> 
  <void property="contentType"> 
   <string>form/swing</string> 
  </void> 
  <void property="root"> 
   <object class="com.jformdesigner.model.FormRoot"> 
    <void method="add"> 
     <object class="com.jformdesigner.model.FormContainer"> 
      <string>javax.swing.JPanel</string> 
      <object class="com.jformdesigner.model.FormLayoutManager"> 
       <class>com.jgoodies.forms.layout.FormLayout</class> 
       <void method="setProperty"> 
        <string>$columnSpecs</string> 
        <string>relgap, default, labelcompgap, default:grow</string> 
       </void> 
       <void method="setProperty"> 
        <string>$rowSpecs</string> 
        <string>default, linegap, default, linegap, default, linegap, default, linegap, default, linegap, default, linegap, default</string> 
       </void> 
      </object> 
      <void method="setProperty"> 
       <string>border</string> 
       <object class="com.jformdesigner.model.FormObject" field="NULL_VALUE"/> 
      </void> 
      <void property="name"> 
       <string>this</string> 
      </void> 
      <void method="add"> 
       <object class="com.jformdesigner.model.FormComponent"> 
        <string>com.jidesoft.swing.TitledSeparator</string> 
        <void method="setProperty"> 
         <string>barAlignment</string> 
         <int>1</int> 
        </void> 
        <void property="name"> 
         <string>nodeSep</string> 
        </void> 
       </object> 
       <object class="com.jformdesigner.model.FormLayoutConstraints"> 
        <class>com.jgoodies.forms.layout.CellConstraints</class> 
        <void method="setProperty"> 
         <string>gridWidth</string> 
         <int>4</int> 
        </void> 
       </object> 
      </void> 
      <void method="add"> 
       <object class="com.jformdesigner.model.FormComponent"> 
        <string>javax.swing.JLabel</string> 
        <void method="setProperty"> 
         <string>text</string> 
         <string>Filter:</string> 
        </void> 
        <void property="name"> 
         <string>label1</string> 
        </void> 
       </object> 
       <object class="com.jformdesigner.model.FormLayoutConstraints"> 
        <class>com.jgoodies.forms.layout.CellConstraints</class> 
        <void method="setProperty"> 
         <string>gridX</string> 
         <int>2</int> 
        </void> 
        <void method="setProperty"> 
         <string>gridY</string> 
         <int>3</int> 
        </void> 
       </object> 
      </void> 
      <void method="add"> 
       <object class="com.jformdesigner.model.FormComponent"> 
        <string>javax.swing.JComboBox</string> 
        <void property="name"> 
         <string>filterBox</string> 
        </void> 
       </object> 
       <object class="com.jformdesigner.model.FormLayoutConstraints"> 
        <class>com.jgoodies.forms.layout.CellConstraints</class> 
        <void method="setProperty"> 
         <string>gridX</string> 
         <int>4</int> 
        </void> 
        <void method="setProperty"> 
         <string>gridY</string> 
         <int>3</int> 
        </void> 
       </object> 
      </void> 
      <void method="add"> 
       <object class="com.jformdesigner.model.FormComponent"> 
        <string>javax.swing.JLabel</string> 
        <void method="setProperty"> 
         <string>text</string> 
         <string>Threshold:</string> 
        </void> 
        <void property="name"> 
         <string>ntLbl</string> 
        </void> 
       </object> 
       <object class="com.jformdesigner.model.FormLayoutConstraints"> 
        <class>com.jgoodies.forms.layout.CellConstraints</class> 
        <void method="setProperty"> 
         <string>gridX</string> 
         <int>2</int> 
        </void> 
        <void method="setProperty"> 
         <string>gridY</string> 
         <int>5</int> 
        </void> 
       </object> 
      </void> 
      <void method="add"> 
       <object class="com.jformdesigner.model.FormComponent"> 
        <string>javax.swing.JFormattedTextField</string> 
        <void property="name"> 
         <string>nodeThreshFld</string> 
        </void> 
       </object> 
       <object class="com.jformdesigner.model.FormLayoutConstraints"> 
        <class>com.jgoodies.forms.layout.CellConstraints</class> 
        <void method="setProperty"> 
         <string>gridX</string> 
         <int>4</int> 
        </void> 
        <void method="setProperty"> 
         <string>gridY</string> 
         <int>5</int> 
        </void> 
       </object> 
      </void> 
      <void method="add"> 
       <object class="com.jformdesigner.model.FormComponent"> 
        <string>com.jidesoft.swing.TitledSeparator</string> 
        <void method="setProperty"> 
         <string>barAlignment</string> 
         <int>1</int> 
        </void> 
        <void property="name"> 
         <string>edgeSep</string> 
        </void> 
       </object> 
       <object class="com.jformdesigner.model.FormLayoutConstraints"> 
        <class>com.jgoodies.forms.layout.CellConstraints</class> 
        <void method="setProperty"> 
         <string>gridY</string> 
         <int>7</int> 
        </void> 
        <void method="setProperty"> 
         <string>gridWidth</string> 
         <int>4</int> 
        </void> 
       </object> 
      </void> 
      <void method="add"> 
       <object class="com.jformdesigner.model.FormComponent"> 
        <string>javax.swing.JLabel</string> 
        <void method="setProperty"> 
         <string>text</string> 
         <string>Filter:</string> 
        </void> 
        <void property="name"> 
         <string>label2</string> 
        </void> 
       </object> 
       <object class="com.jformdesigner.model.FormLayoutConstraints"> 
        <class>com.jgoodies.forms.layout.CellConstraints</class> 
        <void method="setProperty"> 
         <string>gridX</string> 
         <int>2</int> 
        </void> 
        <void method="setProperty"> 
         <string>gridY</string> 
         <int>9</int> 
        </void> 
       </object> 
      </void> 
      <void method="add"> 
       <object class="com.jformdesigner.model.FormComponent"> 
        <string>javax.swing.JComboBox</string> 
        <void property="name"> 
         <string>edgeFilterBox</string> 
        </void> 
       </object> 
       <object class="com.jformdesigner.model.FormLayoutConstraints"> 
        <class>com.jgoodies.forms.layout.CellConstraints</class> 
        <void method="setProperty"> 
         <string>gridX</string> 
         <int>4</int> 
        </void> 
        <void method="setProperty"> 
         <string>gridY</string> 
         <int>9</int> 
        </void> 
       </object> 
      </void> 
      <void method="add"> 
       <object class="com.jformdesigner.model.FormComponent"> 
        <string>javax.swing.JLabel</string> 
        <void method="setProperty"> 
         <string>text</string> 
         <string>Document Threshold:</string> 
        </void> 
        <void property="name"> 
         <string>label3</string> 
        </void> 
       </object> 
       <object class="com.jformdesigner.model.FormLayoutConstraints"> 
        <class>com.jgoodies.forms.layout.CellConstraints</class> 
        <void method="setProperty"> 
         <string>gridX</string> 
         <int>2</int> 
        </void> 
        <void method="setProperty"> 
         <string>gridY</string> 
         <int>11</int> 
        </void> 
       </object> 
      </void> 
      <void method="add"> 
       <object class="com.jformdesigner.model.FormComponent"> 
        <string>javax.swing.JSpinner</string> 
        <void property="name"> 
         <string>docSpn</string> 
        </void> 
       </object> 
       <object class="com.jformdesigner.model.FormLayoutConstraints"> 
        <class>com.jgoodies.forms.layout.CellConstraints</class> 
        <void method="setProperty"> 
         <string>gridX</string> 
         <int>4</int> 
        </void> 
        <void method="setProperty"> 
         <string>gridY</string> 
         <int>11</int> 
        </void> 
       </object> 
      </void> 
      <void method="add"> 
       <object class="com.jformdesigner.model.FormComponent"> 
        <string>javax.swing.JLabel</string> 
        <void method="setProperty"> 
         <string>text</string> 
         <string>Score Threshold:</string> 
        </void> 
        <void property="name"> 
         <string>stLbl</string> 
        </void> 
       </object> 
       <object class="com.jformdesigner.model.FormLayoutConstraints"> 
        <class>com.jgoodies.forms.layout.CellConstraints</class> 
        <void method="setProperty"> 
         <string>gridX</string> 
         <int>2</int> 
        </void> 
        <void method="setProperty"> 
         <string>gridY</string> 
         <int>13</int> 
        </void> 
       </object> 
      </void> 
      <void method="add"> 
       <object class="com.jformdesigner.model.FormComponent"> 
        <string>javax.swing.JFormattedTextField</string> 
        <void property="name"> 
         <string>scoreThreshFld</string> 
        </void> 
       </object> 
       <object class="com.jformdesigner.model.FormLayoutConstraints"> 
        <class>com.jgoodies.forms.layout.CellConstraints</class> 
        <void method="setProperty"> 
         <string>gridX</string> 
         <int>4</int> 
        </void> 
        <void method="setProperty"> 
         <string>gridY</string> 
         <int>13</int> 
        </void> 
       </object> 
      </void> 
     </object> 
     <object class="com.jformdesigner.model.FormLayoutConstraints"> 
      <null/> 
      <void method="setProperty"> 
       <string>location</string> 
       <object class="java.awt.Point"> 
        <int>0</int> 
        <int>0</int> 
       </object> 
      </void> 
      <void method="setProperty"> 
       <string>size</string> 
       <object class="java.awt.Dimension"> 
        <int>400</int> 
        <int>300</int> 
       </object> 
      </void> 
     </object> 
    </void> 
   </object> 
  </void> 
 </object> 
</java> 
