# Supplementary material
Source: MDPI journal article supplement (https://www.mdpi.com/2071-1050/2/5/1182)
Supplement: s1 [file s1 › Sustainability_Altaweel_EtAl/Client/bin/anl/aida/client/gui/TriggerPanel.jfd]

<?xml version="1.0" encoding="UTF-8"?> 
<java version="1.6.0_07" class="java.beans.XMLDecoder"> 
 <object class="com.jformdesigner.model.FormModel"> 
  <void property="contentType"> 
   <string>form/swing</string> 
  </void> 
  <void property="root"> 
   <object class="com.jformdesigner.model.FormRoot"> 
    <void method="add"> 
     <object class="com.jformdesigner.model.FormContainer"> 
      <string>javax.swing.JPanel</string> 
      <object class="com.jformdesigner.model.FormLayoutManager"> 
       <class>java.awt.BorderLayout</class> 
      </object> 
      <void method="setProperty"> 
       <string>border</string> 
       <object id="EmptyBorder0" class="javax.swing.border.EmptyBorder"> 
        <object class="java.awt.Insets"> 
         <int>5</int> 
         <int>5</int> 
         <int>5</int> 
         <int>5</int> 
        </object> 
       </object> 
      </void> 
      <void property="name"> 
       <string>this</string> 
      </void> 
      <void method="add"> 
       <object class="com.jformdesigner.model.FormContainer"> 
        <string>javax.swing.JSplitPane</string> 
        <object class="com.jformdesigner.model.FormLayoutManager"> 
         <class>javax.swing.JSplitPane</class> 
        </object> 
        <void method="setProperty"> 
         <string>resizeWeight</string> 
         <double>0.3</double> 
        </void> 
        <void method="setProperty"> 
         <string>border</string> 
         <object class="com.jformdesigner.model.FormObject" field="NULL_VALUE"/> 
        </void> 
        <void property="name"> 
         <string>splitPane1</string> 
        </void> 
        <void method="add"> 
         <object class="com.jformdesigner.model.FormContainer"> 
          <string>javax.swing.JPanel</string> 
          <object class="com.jformdesigner.model.FormLayoutManager"> 
           <class>java.awt.BorderLayout</class> 
          </object> 
          <void property="name"> 
           <string>panel1</string> 
          </void> 
          <void method="add"> 
           <object class="com.jformdesigner.model.FormContainer"> 
            <string>javax.swing.JToolBar</string> 
            <object class="com.jformdesigner.model.FormLayoutManager"> 
             <class>javax.swing.JToolBar</class> 
            </object> 
            <void method="setProperty"> 
             <string>floatable</string> 
             <boolean>false</boolean> 
            </void> 
            <void property="name"> 
             <string>toolBar1</string> 
            </void> 
            <void method="add"> 
             <object class="com.jformdesigner.model.FormComponent"> 
              <string>javax.swing.JButton</string> 
              <void method="setProperty"> 
               <string>text</string> 
               <string>+</string> 
              </void> 
              <void property="name"> 
               <string>addBtn</string> 
              </void> 
             </object> 
            </void> 
            <void method="add"> 
             <object class="com.jformdesigner.model.FormComponent"> 
              <string>javax.swing.JButton</string> 
              <void method="setProperty"> 
               <string>text</string> 
               <string>-</string> 
              </void> 
              <void property="name"> 
               <string>deleteBtn</string> 
              </void> 
             </object> 
            </void> 
           </object> 
           <object class="com.jformdesigner.model.FormLayoutConstraints"> 
            <class>java.lang.String</class> 
            <void method="setProperty"> 
             <string>value</string> 
             <string>North</string> 
            </void> 
           </object> 
          </void> 
          <void method="add"> 
           <object class="com.jformdesigner.model.FormContainer"> 
            <string>javax.swing.JScrollPane</string> 
            <object class="com.jformdesigner.model.FormLayoutManager"> 
             <class>javax.swing.JScrollPane</class> 
            </object> 
            <void property="name"> 
             <string>scrollPane1</string> 
            </void> 
            <void method="add"> 
             <object class="com.jformdesigner.model.FormComponent"> 
              <string>javax.swing.JList</string> 
              <void method="setProperty"> 
               <string>selectionMode</string> 
               <int>0</int> 
              </void> 
              <void property="name"> 
               <string>triggerList</string> 
              </void> 
             </object> 
            </void> 
           </object> 
           <object class="com.jformdesigner.model.FormLayoutConstraints"> 
            <class>java.lang.String</class> 
            <void method="setProperty"> 
             <string>value</string> 
             <string>Center</string> 
            </void> 
           </object> 
          </void> 
         </object> 
         <object class="com.jformdesigner.model.FormLayoutConstraints"> 
          <class>java.lang.String</class> 
          <void method="setProperty"> 
           <string>value</string> 
           <string>left</string> 
          </void> 
         </object> 
        </void> 
        <void method="add"> 
         <object class="com.jformdesigner.model.FormContainer"> 
          <string>javax.swing.JTabbedPane</string> 
          <object class="com.jformdesigner.model.FormLayoutManager"> 
           <class>javax.swing.JTabbedPane</class> 
          </object> 
          <void property="name"> 
           <string>tabbedPane1</string> 
          </void> 
          <void method="add"> 
           <object class="com.jformdesigner.model.FormContainer"> 
            <string>javax.swing.JPanel</string> 
            <object class="com.jformdesigner.model.FormLayoutManager"> 
             <class>com.jgoodies.forms.layout.FormLayout</class> 
             <void method="setProperty"> 
              <string>$columnSpecs</string> 
              <string>default:grow</string> 
             </void> 
             <void method="setProperty"> 
              <string>$rowSpecs</string> 
              <string>unrelgap, linegap, default, linegap, default, linegap, default, linegap, fill:default:grow, linegap, default, linegap, default, linegap, default</string> 
             </void> 
            </object> 
            <void method="setProperty"> 
             <string>border</string> 
             <object idref="EmptyBorder0"/> 
            </void> 
            <void property="name"> 
             <string>panel2</string> 
            </void> 
            <void method="add"> 
             <object class="com.jformdesigner.model.FormComponent"> 
              <string>javax.swing.JLabel</string> 
              <void method="setProperty"> 
               <string>text</string> 
               <string>Name:</string> 
              </void> 
              <void property="name"> 
               <string>label1</string> 
              </void> 
             </object> 
             <object class="com.jformdesigner.model.FormLayoutConstraints"> 
              <class>com.jgoodies.forms.layout.CellConstraints</class> 
              <void method="setProperty"> 
               <string>gridY</string> 
               <int>3</int> 
              </void> 
             </object> 
            </void> 
            <void method="add"> 
             <object class="com.jformdesigner.model.FormComponent"> 
              <string>javax.swing.JTextField</string> 
              <void property="name"> 
               <string>nameFld</string> 
              </void> 
             </object> 
             <object class="com.jformdesigner.model.FormLayoutConstraints"> 
              <class>com.jgoodies.forms.layout.CellConstraints</class> 
              <void method="setProperty"> 
               <string>gridY</string> 
               <int>5</int> 
              </void> 
             </object> 
            </void> 
            <void method="add"> 
             <object class="com.jformdesigner.model.FormComponent"> 
              <string>javax.swing.JLabel</string> 
              <void method="setProperty"> 
               <string>text</string> 
               <string>Query:</string> 
              </void> 
              <void property="name"> 
               <string>label2</string> 
              </void> 
             </object> 
             <object class="com.jformdesigner.model.FormLayoutConstraints"> 
              <class>com.jgoodies.forms.layout.CellConstraints</class> 
              <void method="setProperty"> 
               <string>gridY</string> 
               <int>7</int> 
              </void> 
             </object> 
            </void> 
            <void method="add"> 
             <object class="com.jformdesigner.model.FormContainer"> 
              <string>javax.swing.JScrollPane</string> 
              <object class="com.jformdesigner.model.FormLayoutManager"> 
               <class>javax.swing.JScrollPane</class> 
              </object> 
              <void property="name"> 
               <string>scrollPane2</string> 
              </void> 
              <void method="add"> 
               <object class="com.jformdesigner.model.FormComponent"> 
                <string>javax.swing.JTextArea</string> 
                <void method="setProperty"> 
                 <string>rows</string> 
                 <int>3</int> 
                </void> 
                <void method="setProperty"> 
                 <string>lineWrap</string> 
                 <boolean>true</boolean> 
                </void> 
                <void method="setProperty"> 
                 <string>columns</string> 
                 <int>40</int> 
                </void> 
                <void property="name"> 
                 <string>queryArea</string> 
                </void> 
               </object> 
              </void> 
             </object> 
             <object class="com.jformdesigner.model.FormLayoutConstraints"> 
              <class>com.jgoodies.forms.layout.CellConstraints</class> 
              <void method="setProperty"> 
               <string>gridY</string> 
               <int>9</int> 
              </void> 
             </object> 
            </void> 
            <void method="add"> 
             <object class="com.jformdesigner.model.FormComponent"> 
              <string>javax.swing.JLabel</string> 
              <void method="setProperty"> 
               <string>text</string> 
               <string>Send Alerts To:</string> 
              </void> 
              <void property="name"> 
               <string>label3</string> 
              </void> 
             </object> 
             <object class="com.jformdesigner.model.FormLayoutConstraints"> 
              <class>com.jgoodies.forms.layout.CellConstraints</class> 
              <void method="setProperty"> 
               <string>gridY</string> 
               <int>11</int> 
              </void> 
             </object> 
            </void> 
            <void method="add"> 
             <object class="com.jformdesigner.model.FormComponent"> 
              <string>javax.swing.JTextField</string> 
              <void property="name"> 
               <string>emailFld</string> 
              </void> 
             </object> 
             <object class="com.jformdesigner.model.FormLayoutConstraints"> 
              <class>com.jgoodies.forms.layout.CellConstraints</class> 
              <void method="setProperty"> 
               <string>gridY</string> 
               <int>13</int> 
              </void> 
             </object> 
            </void> 
            <void method="add"> 
             <object class="com.jformdesigner.model.FormContainer"> 
              <string>javax.swing.JPanel</string> 
              <object class="com.jformdesigner.model.FormLayoutManager"> 
               <class>java.awt.FlowLayout</class> 
               <void method="setProperty"> 
                <string>alignment</string> 
                <int>2</int> 
               </void> 
              </object> 
              <void property="name"> 
               <string>panel4</string> 
              </void> 
              <void method="add"> 
               <object class="com.jformdesigner.model.FormComponent"> 
                <string>javax.swing.JButton</string> 
                <void method="setProperty"> 
                 <string>text</string> 
                 <string>Test</string> 
                </void> 
                <void property="name"> 
                 <string>runBtn</string> 
                </void> 
               </object> 
              </void> 
             </object> 
             <object class="com.jformdesigner.model.FormLayoutConstraints"> 
              <class>com.jgoodies.forms.layout.CellConstraints</class> 
              <void method="setProperty"> 
               <string>gridX</string> 
               <int>1</int> 
              </void> 
              <void method="setProperty"> 
               <string>gridY</string> 
               <int>15</int> 
              </void> 
             </object> 
            </void> 
           </object> 
           <object class="com.jformdesigner.model.FormLayoutConstraints"> 
            <null/> 
            <void method="setProperty"> 
             <string>title</string> 
             <string>Alert</string> 
            </void> 
           </object> 
          </void> 
          <void method="add"> 
           <object class="com.jformdesigner.model.FormContainer"> 
            <string>javax.swing.JPanel</string> 
            <object class="com.jformdesigner.model.FormLayoutManager"> 
             <class>java.awt.BorderLayout</class> 
            </object> 
            <void property="name"> 
             <string>panel3</string> 
            </void> 
            <void method="add"> 
             <object class="com.jformdesigner.model.FormContainer"> 
              <string>javax.swing.JScrollPane</string> 
              <object class="com.jformdesigner.model.FormLayoutManager"> 
               <class>javax.swing.JScrollPane</class> 
              </object> 
              <void property="name"> 
               <string>scrollPane3</string> 
              </void> 
              <void method="add"> 
               <object class="com.jformdesigner.model.FormComponent"> 
                <string>javax.swing.JTextArea</string> 
                <void property="name"> 
                 <string>resultsArea</string> 
                </void> 
               </object> 
              </void> 
             </object> 
             <object class="com.jformdesigner.model.FormLayoutConstraints"> 
              <class>java.lang.String</class> 
              <void method="setProperty"> 
               <string>value</string> 
               <string>Center</string> 
              </void> 
             </object> 
            </void> 
           </object> 
           <object class="com.jformdesigner.model.FormLayoutConstraints"> 
            <null/> 
            <void method="setProperty"> 
             <string>title</string> 
             <string>Test Results</string> 
            </void> 
           </object> 
          </void> 
         </object> 
         <object class="com.jformdesigner.model.FormLayoutConstraints"> 
          <class>java.lang.String</class> 
          <void method="setProperty"> 
           <string>value</string> 
           <string>right</string> 
          </void> 
         </object> 
        </void> 
       </object> 
       <object class="com.jformdesigner.model.FormLayoutConstraints"> 
        <class>java.lang.String</class> 
        <void method="setProperty"> 
         <string>value</string> 
         <string>Center</string> 
        </void> 
       </object> 
      </void> 
     </object> 
     <object class="com.jformdesigner.model.FormLayoutConstraints"> 
      <null/> 
      <void method="setProperty"> 
       <string>location</string> 
       <object class="java.awt.Point"> 
        <int>0</int> 
        <int>0</int> 
       </object> 
      </void> 
      <void method="setProperty"> 
       <string>size</string> 
       <object class="java.awt.Dimension"> 
        <int>550</int> 
        <int>315</int> 
       </object> 
      </void> 
     </object> 
    </void> 
   </object> 
  </void> 
 </object> 
</java> 
