# Supplementary material
Source: MDPI journal article supplement (https://www.mdpi.com/2071-1050/2/5/1182)
Supplement: s1 [file s1 › Sustainability_Altaweel_EtAl/Client/bin/anl/aida/palette/ColorMap.vt]

<ColorMap intervalType="$map.intervalType" paletteType="$map.paletteType" min="$map.min" max="$map.max">
    <Scale description="Color Scale">
        #set( $len = $map.getMaxIndex() )
        #foreach( $step in [0..$len] )
        <Step>$map.getStep($step)</Step>
        #end
        <Step>$map.max</Step>
    </Scale>
    <Palette description="$map.palette.description">
        #foreach($color in $map.palette.colors)
        <Color>$color.getRGB()</Color>
        #end
    </Palette>
</ColorMap>
