# Supplementary material
Source: MDPI journal article supplement (https://www.mdpi.com/2071-1050/2/5/1182)
Supplement: s1 [file s1 › Sustainability_Altaweel_EtAl/Client/bin/anl/aida/query/query_parser.jj]

/*@bgen(jjtree) Generated By:JJTree: Do not edit this line. ./query_parser.jj */
/*@egen*/options {              
  STATIC=false;
  JDK_VERSION="1.6";
  
}

PARSER_BEGIN(Parser)
 package anl.mifs.query;

 import java.util.*;

public class Parser/*@bgen(jjtree)*/implements ParserTreeConstants/*@egen*/ {/*@bgen(jjtree)*/
  protected JJTParserState jjtree = new JJTParserState();

/*@egen*/

  public static void main(String args[]) {
    System.out.println("Reading from standard input...");
    Parser parser = new Parser(System.in);
    try {
      ASTstart n = parser.start();
      n.dump("");
       /*
      float val = n.evaluate();
      System.out.println("val = " + val);

      if (val == 0) System.out.println("FALSE");
      else if (val == 1) System.out.println("TRUE");
      else System.out.println("Unexpected value: " + val);
      */
      System.out.println("Thank you.");
    } catch (Exception e) {
      System.out.println("Oops.");
      System.out.println(e.getMessage());
      e.printStackTrace();
    }
  }
}

PARSER_END(Parser)


SKIP :
{
  " "
| "\t"
| "\n"
| "\r"
| <"//" (~["\n","\r"])* ("\n"|"\r"|"\r\n")>
| <"/*" (~["*"])* "*" (~["/"] (~["*"])* "*")* "/">
}

TOKEN : /* LITERALS */
{
  < INTEGER_LITERAL:
        <DECIMAL_LITERAL> (["l","L"])?
  >
  |
      < FLOAT:
          (["0"-"9"])+ "." (["0"-"9"])* (<EXPONENT>)? (["f", "F"])?
        | "." (["0"-"9"])+ (<EXPONENT>)? (["f", "F"])?
        | (["0"-"9"])+ <EXPONENT> (["f", "F"])?
        >
  |   < #EXPONENT: ["e","E"] (["+","-"])? (["0"-"9"])+ >

  | < #DECIMAL_LITERAL: ["1"-"9"] (["0"-"9"])* | "0" >
}

TOKEN: /* operators */
{
    < GREATER: ">" >
|   < LESS: "<" >
|   < EQEQUAL: "==" >
|   < EQLESS: "<=" >
|   < EQGREATER: ">=" >
|   < NOT_EQUAL: "!=" >
|   < PLUS: "+" >
|   < MINUS: "-" >
|   < TIMES: "*" >
|   < DIV: "/" >
|   < MOD: "%" >
|   < POW: "**" >
|	<AND: "and">
|	<OR: "or">
}

TOKEN: /* functions */
{

  < COUNT: "count" >
| < MEAN: "mean" >
/*
| < ABS: "abs" >
| < SQRT: "sqrt" >
| < SQR: "sqr" >
| < LOG: "log10" >
| < EXP: "exp" >
| < LN: "log" >
| < SIN: "sin" >
| < COS: "cos" >
| < TAN: "tan" >
| < SIND: "sind" >
| < COSD: "cosd" >
| < TAND: "tand" >
| < SUM: "sum" >
| < MIN: "min" >
| < MAX: "max" >
| < KURTOSIS: "kurtosis" >
| < PRODUCT: "product" >
| < SKEWNESS: "skewness" >
| < STDDEV: "stddev" >
| < VARIANCE: "variance" >
*/
}


TOKEN: /* numerical constants */
{
	< E: "E" >
| < PI: "PI" >
}

ASTstart start() : {/*@bgen(jjtree) start */
  ASTstart jjtn000 = new ASTstart(JJTSTART);
  boolean jjtc000 = true;
  jjtree.openNodeScope(jjtn000);
/*@egen*/}
{/*@bgen(jjtree) start */
  try {
/*@egen*/
  AndOrExpression() ";"/*@bgen(jjtree)*/
  {
    jjtree.closeNodeScope(jjtn000, true);
    jjtc000 = false;
  }
/*@egen*/
  { return jjtn000; }/*@bgen(jjtree)*/
  } catch (Throwable jjte000) {
    if (jjtc000) {
      jjtree.clearNodeScope(jjtn000);
      jjtc000 = false;
    } else {
      jjtree.popNode();
    }
    if (jjte000 instanceof RuntimeException) {
      throw (RuntimeException)jjte000;
    }
    if (jjte000 instanceof ParseException) {
      throw (ParseException)jjte000;
    }
    throw (Error)jjte000;
  } finally {
    if (jjtc000) {
      jjtree.closeNodeScope(jjtn000, true);
    }
  }
/*@egen*/
}

void AndOrExpression()      :
{}
{
	EqualityExpression()
	(
		<AND>/*@bgen(jjtree) #And( 2) */
                      {
                        ASTAnd jjtn001 = new ASTAnd(JJTAND);
                        boolean jjtc001 = true;
                        jjtree.openNodeScope(jjtn001);
                      }
                      try {
/*@egen*/ EqualityExpression()/*@bgen(jjtree)*/
                      } catch (Throwable jjte001) {
                        if (jjtc001) {
                          jjtree.clearNodeScope(jjtn001);
                          jjtc001 = false;
                        } else {
                          jjtree.popNode();
                        }
                        if (jjte001 instanceof RuntimeException) {
                          throw (RuntimeException)jjte001;
                        }
                        if (jjte001 instanceof ParseException) {
                          throw (ParseException)jjte001;
                        }
                        throw (Error)jjte001;
                      } finally {
                        if (jjtc001) {
                          jjtree.closeNodeScope(jjtn001,  2);
                        }
                      }
/*@egen*/
	|
		<OR>/*@bgen(jjtree) #Or( 2) */
                     {
                       ASTOr jjtn002 = new ASTOr(JJTOR);
                       boolean jjtc002 = true;
                       jjtree.openNodeScope(jjtn002);
                     }
                     try {
/*@egen*/ EqualityExpression()/*@bgen(jjtree)*/
                     } catch (Throwable jjte002) {
                       if (jjtc002) {
                         jjtree.clearNodeScope(jjtn002);
                         jjtc002 = false;
                       } else {
                         jjtree.popNode();
                       }
                       if (jjte002 instanceof RuntimeException) {
                         throw (RuntimeException)jjte002;
                       }
                       if (jjte002 instanceof ParseException) {
                         throw (ParseException)jjte002;
                       }
                       throw (Error)jjte002;
                     } finally {
                       if (jjtc002) {
                         jjtree.closeNodeScope(jjtn002,  2);
                       }
                     }
/*@egen*/
	)*	
}

void EqualityExpression()       :
{}
{
  RelationalExpression()
  (
     <EQEQUAL>/*@bgen(jjtree) #EqEqual( 2) */
               {
                 ASTEqEqual jjtn001 = new ASTEqEqual(JJTEQEQUAL);
                 boolean jjtc001 = true;
                 jjtree.openNodeScope(jjtn001);
               }
               try {
/*@egen*/ RelationalExpression()/*@bgen(jjtree)*/
               } catch (Throwable jjte001) {
                 if (jjtc001) {
                   jjtree.clearNodeScope(jjtn001);
                   jjtc001 = false;
                 } else {
                   jjtree.popNode();
                 }
                 if (jjte001 instanceof RuntimeException) {
                   throw (RuntimeException)jjte001;
                 }
                 if (jjte001 instanceof ParseException) {
                   throw (ParseException)jjte001;
                 }
                 throw (Error)jjte001;
               } finally {
                 if (jjtc001) {
                   jjtree.closeNodeScope(jjtn001,  2);
                 }
               }
/*@egen*/
   |
     <NOT_EQUAL>/*@bgen(jjtree) #NotEqual( 2) */
                 {
                   ASTNotEqual jjtn002 = new ASTNotEqual(JJTNOTEQUAL);
                   boolean jjtc002 = true;
                   jjtree.openNodeScope(jjtn002);
                 }
                 try {
/*@egen*/ RelationalExpression()/*@bgen(jjtree)*/
                 } catch (Throwable jjte002) {
                   if (jjtc002) {
                     jjtree.clearNodeScope(jjtn002);
                     jjtc002 = false;
                   } else {
                     jjtree.popNode();
                   }
                   if (jjte002 instanceof RuntimeException) {
                     throw (RuntimeException)jjte002;
                   }
                   if (jjte002 instanceof ParseException) {
                     throw (ParseException)jjte002;
                   }
                   throw (Error)jjte002;
                 } finally {
                   if (jjtc002) {
                     jjtree.closeNodeScope(jjtn002,  2);
                   }
                 }
/*@egen*/
  )*
}

void RelationalExpression()       :
{}
{
  AdditiveExpression()
  (
    <LESS>/*@bgen(jjtree) #LessThan( 2) */
           {
             ASTLessThan jjtn001 = new ASTLessThan(JJTLESSTHAN);
             boolean jjtc001 = true;
             jjtree.openNodeScope(jjtn001);
           }
           try {
/*@egen*/ AdditiveExpression()/*@bgen(jjtree)*/
           } catch (Throwable jjte001) {
             if (jjtc001) {
               jjtree.clearNodeScope(jjtn001);
               jjtc001 = false;
             } else {
               jjtree.popNode();
             }
             if (jjte001 instanceof RuntimeException) {
               throw (RuntimeException)jjte001;
             }
             if (jjte001 instanceof ParseException) {
               throw (ParseException)jjte001;
             }
             throw (Error)jjte001;
           } finally {
             if (jjtc001) {
               jjtree.closeNodeScope(jjtn001,  2);
             }
           }
/*@egen*/
   |
    <GREATER>/*@bgen(jjtree) #GreaterThan( 2) */
              {
                ASTGreaterThan jjtn002 = new ASTGreaterThan(JJTGREATERTHAN);
                boolean jjtc002 = true;
                jjtree.openNodeScope(jjtn002);
              }
              try {
/*@egen*/ AdditiveExpression()/*@bgen(jjtree)*/
              } catch (Throwable jjte002) {
                if (jjtc002) {
                  jjtree.clearNodeScope(jjtn002);
                  jjtc002 = false;
                } else {
                  jjtree.popNode();
                }
                if (jjte002 instanceof RuntimeException) {
                  throw (RuntimeException)jjte002;
                }
                if (jjte002 instanceof ParseException) {
                  throw (ParseException)jjte002;
                }
                throw (Error)jjte002;
              } finally {
                if (jjtc002) {
                  jjtree.closeNodeScope(jjtn002,  2);
                }
              }
/*@egen*/
   |
    <EQLESS>/*@bgen(jjtree) #LessEq( 2) */
             {
               ASTLessEq jjtn003 = new ASTLessEq(JJTLESSEQ);
               boolean jjtc003 = true;
               jjtree.openNodeScope(jjtn003);
             }
             try {
/*@egen*/ AdditiveExpression()/*@bgen(jjtree)*/
             } catch (Throwable jjte003) {
               if (jjtc003) {
                 jjtree.clearNodeScope(jjtn003);
                 jjtc003 = false;
               } else {
                 jjtree.popNode();
               }
               if (jjte003 instanceof RuntimeException) {
                 throw (RuntimeException)jjte003;
               }
               if (jjte003 instanceof ParseException) {
                 throw (ParseException)jjte003;
               }
               throw (Error)jjte003;
             } finally {
               if (jjtc003) {
                 jjtree.closeNodeScope(jjtn003,  2);
               }
             }
/*@egen*/
   |
    <EQGREATER>/*@bgen(jjtree) #GreaterEq( 2) */
                {
                  ASTGreaterEq jjtn004 = new ASTGreaterEq(JJTGREATEREQ);
                  boolean jjtc004 = true;
                  jjtree.openNodeScope(jjtn004);
                }
                try {
/*@egen*/ AdditiveExpression()/*@bgen(jjtree)*/
                } catch (Throwable jjte004) {
                  if (jjtc004) {
                    jjtree.clearNodeScope(jjtn004);
                    jjtc004 = false;
                  } else {
                    jjtree.popNode();
                  }
                  if (jjte004 instanceof RuntimeException) {
                    throw (RuntimeException)jjte004;
                  }
                  if (jjte004 instanceof ParseException) {
                    throw (ParseException)jjte004;
                  }
                  throw (Error)jjte004;
                } finally {
                  if (jjtc004) {
                    jjtree.closeNodeScope(jjtn004,  2);
                  }
                }
/*@egen*/
  )*
}

void AdditiveExpression()       :
{}
{
  MultiplicativeExpression()
  (
    <PLUS>/*@bgen(jjtree) #Add( 2) */
           {
             ASTAdd jjtn001 = new ASTAdd(JJTADD);
             boolean jjtc001 = true;
             jjtree.openNodeScope(jjtn001);
           }
           try {
/*@egen*/ MultiplicativeExpression()/*@bgen(jjtree)*/
           } catch (Throwable jjte001) {
             if (jjtc001) {
               jjtree.clearNodeScope(jjtn001);
               jjtc001 = false;
             } else {
               jjtree.popNode();
             }
             if (jjte001 instanceof RuntimeException) {
               throw (RuntimeException)jjte001;
             }
             if (jjte001 instanceof ParseException) {
               throw (ParseException)jjte001;
             }
             throw (Error)jjte001;
           } finally {
             if (jjtc001) {
               jjtree.closeNodeScope(jjtn001,  2);
             }
           }
/*@egen*/
   |
    <MINUS>/*@bgen(jjtree) #Subtract( 2) */
            {
              ASTSubtract jjtn002 = new ASTSubtract(JJTSUBTRACT);
              boolean jjtc002 = true;
              jjtree.openNodeScope(jjtn002);
            }
            try {
/*@egen*/ MultiplicativeExpression()/*@bgen(jjtree)*/
            } catch (Throwable jjte002) {
              if (jjtc002) {
                jjtree.clearNodeScope(jjtn002);
                jjtc002 = false;
              } else {
                jjtree.popNode();
              }
              if (jjte002 instanceof RuntimeException) {
                throw (RuntimeException)jjte002;
              }
              if (jjte002 instanceof ParseException) {
                throw (ParseException)jjte002;
              }
              throw (Error)jjte002;
            } finally {
              if (jjtc002) {
                jjtree.closeNodeScope(jjtn002,  2);
              }
            }
/*@egen*/
  )*
}

void MultiplicativeExpression()       :
{}
{
	powExpression()
  (
    <TIMES>/*@bgen(jjtree) #Mul( 2) */
            {
              ASTMul jjtn001 = new ASTMul(JJTMUL);
              boolean jjtc001 = true;
              jjtree.openNodeScope(jjtn001);
            }
            try {
/*@egen*/ powExpression()/*@bgen(jjtree)*/
            } catch (Throwable jjte001) {
              if (jjtc001) {
                jjtree.clearNodeScope(jjtn001);
                jjtc001 = false;
              } else {
                jjtree.popNode();
              }
              if (jjte001 instanceof RuntimeException) {
                throw (RuntimeException)jjte001;
              }
              if (jjte001 instanceof ParseException) {
                throw (ParseException)jjte001;
              }
              throw (Error)jjte001;
            } finally {
              if (jjtc001) {
                jjtree.closeNodeScope(jjtn001,  2);
              }
            }
/*@egen*/
   |
    <DIV>/*@bgen(jjtree) #Div( 2) */
          {
            ASTDiv jjtn002 = new ASTDiv(JJTDIV);
            boolean jjtc002 = true;
            jjtree.openNodeScope(jjtn002);
          }
          try {
/*@egen*/ powExpression()/*@bgen(jjtree)*/
          } catch (Throwable jjte002) {
            if (jjtc002) {
              jjtree.clearNodeScope(jjtn002);
              jjtc002 = false;
            } else {
              jjtree.popNode();
            }
            if (jjte002 instanceof RuntimeException) {
              throw (RuntimeException)jjte002;
            }
            if (jjte002 instanceof ParseException) {
              throw (ParseException)jjte002;
            }
            throw (Error)jjte002;
          } finally {
            if (jjtc002) {
              jjtree.closeNodeScope(jjtn002,  2);
            }
          }
/*@egen*/
   |
    <MOD>/*@bgen(jjtree) #Mod( 2) */
          {
            ASTMod jjtn003 = new ASTMod(JJTMOD);
            boolean jjtc003 = true;
            jjtree.openNodeScope(jjtn003);
          }
          try {
/*@egen*/ powExpression()/*@bgen(jjtree)*/
          } catch (Throwable jjte003) {
            if (jjtc003) {
              jjtree.clearNodeScope(jjtn003);
              jjtc003 = false;
            } else {
              jjtree.popNode();
            }
            if (jjte003 instanceof RuntimeException) {
              throw (RuntimeException)jjte003;
            }
            if (jjte003 instanceof ParseException) {
              throw (ParseException)jjte003;
            }
            throw (Error)jjte003;
          } finally {
            if (jjtc003) {
              jjtree.closeNodeScope(jjtn003,  2);
            }
          }
/*@egen*/
  )*
}

void powExpression()       :
{}
{
	UnaryExpression()
	(
		<POW>/*@bgen(jjtree) #Pow( 2) */
                      {
                        ASTPow jjtn001 = new ASTPow(JJTPOW);
                        boolean jjtc001 = true;
                        jjtree.openNodeScope(jjtn001);
                      }
                      try {
/*@egen*/ UnaryExpression()/*@bgen(jjtree)*/
                      } catch (Throwable jjte001) {
                        if (jjtc001) {
                          jjtree.clearNodeScope(jjtn001);
                          jjtc001 = false;
                        } else {
                          jjtree.popNode();
                        }
                        if (jjte001 instanceof RuntimeException) {
                          throw (RuntimeException)jjte001;
                        }
                        if (jjte001 instanceof ParseException) {
                          throw (ParseException)jjte001;
                        }
                        throw (Error)jjte001;
                      } finally {
                        if (jjtc001) {
                          jjtree.closeNodeScope(jjtn001,  2);
                        }
                      }
/*@egen*/
	)*
}

void UnaryExpression()       : {}
{
  "(" EqualityExpression() ")"
  |
  Func()
  |
  Var()
  |
  Number()
}

void Var()       :
{
  Token t;
}
{/*@bgen(jjtree) E */
                  {
                    ASTE jjtn001 = new ASTE(JJTE);
                    boolean jjtc001 = true;
                    jjtree.openNodeScope(jjtn001);
                  }
                  try {
/*@egen*/<E>/*@bgen(jjtree)*/
                  } finally {
                    if (jjtc001) {
                      jjtree.closeNodeScope(jjtn001, true);
                    }
                  }
/*@egen*/
	|/*@bgen(jjtree) PI */
                  {
                    ASTPI jjtn002 = new ASTPI(JJTPI);
                    boolean jjtc002 = true;
                    jjtree.openNodeScope(jjtn002);
                  }
                  try {
/*@egen*/<PI>/*@bgen(jjtree)*/
                  } finally {
                    if (jjtc002) {
                      jjtree.closeNodeScope(jjtn002, true);
                    }
                  }
/*@egen*/
	|
  t=<IDENTIFIER>/*@bgen(jjtree) Var */
  {
    ASTVar jjtn003 = new ASTVar(JJTVAR);
    boolean jjtc003 = true;
    jjtree.openNodeScope(jjtn003);
  }
  try {
/*@egen*//*@bgen(jjtree)*/
  {
    jjtree.closeNodeScope(jjtn003, true);
    jjtc003 = false;
  }
/*@egen*/
  {
    jjtn003.setName(t.image);
  }/*@bgen(jjtree)*/
  } finally {
    if (jjtc003) {
      jjtree.closeNodeScope(jjtn003, true);
    }
  }
/*@egen*/
}

void QuotedVar()       : {}
{
	"'" Var() "'"
}

void VarList()         : {/*@bgen(jjtree) VarList */
  ASTVarList jjtn000 = new ASTVarList(JJTVARLIST);
  boolean jjtc000 = true;
  jjtree.openNodeScope(jjtn000);
/*@egen*/}
{/*@bgen(jjtree) VarList */
        try {
/*@egen*/
	Var()
	("," Var()
	)*/*@bgen(jjtree)*/
        } catch (Throwable jjte000) {
          if (jjtc000) {
            jjtree.clearNodeScope(jjtn000);
            jjtc000 = false;
          } else {
            jjtree.popNode();
          }
          if (jjte000 instanceof RuntimeException) {
            throw (RuntimeException)jjte000;
          }
          if (jjte000 instanceof ParseException) {
            throw (ParseException)jjte000;
          }
          throw (Error)jjte000;
        } finally {
          if (jjtc000) {
            jjtree.closeNodeScope(jjtn000, true);
          }
        }
/*@egen*/

}

void Func()       :
{}
{
  (
    <COUNT> "(" VarList()/*@bgen(jjtree) #Count( 1) */
                          {
                            ASTCount jjtn001 = new ASTCount(JJTCOUNT);
                            boolean jjtc001 = true;
                            jjtree.openNodeScope(jjtn001);
                          }
                          try {
/*@egen*/ ")"/*@bgen(jjtree)*/
                          } finally {
                            if (jjtc001) {
                              jjtree.closeNodeScope(jjtn001,  1);
                            }
                          }
/*@egen*/
  |
    <MEAN> "(" EqualityExpression()/*@bgen(jjtree) #Mean( 1) */
                                    {
                                      ASTMean jjtn002 = new ASTMean(JJTMEAN);
                                      boolean jjtc002 = true;
                                      jjtree.openNodeScope(jjtn002);
                                    }
                                    try {
/*@egen*/ ")"/*@bgen(jjtree)*/
                                    } finally {
                                      if (jjtc002) {
                                        jjtree.closeNodeScope(jjtn002,  1);
                                      }
                                    }
/*@egen*/
  
  /*
    <ABS> "(" EqualityExpression() ")" #Abs(1)
  |
    <SQRT> "(" EqualityExpression() ")" #Sqrt(1)
  |
    <SQR> "(" EqualityExpression() ")" #Sqr(1)
  |
    <LOG> "(" EqualityExpression() ")" #Log(1)
  |
    <EXP> "(" EqualityExpression() ")" #Exp(1)
  |
    <LN> "(" EqualityExpression() ")" #Ln(1)
  |
    <SIN> "(" EqualityExpression() ")" #Sin(1)
  |
    <COS> "(" EqualityExpression() ")" #Cos(1)
  |
    <TAN> "(" EqualityExpression() ")" #Tan(1)
  |
    <SIND> "(" EqualityExpression() ")" #Sind(1)
  |
    <COSD> "(" EqualityExpression() ")" #Cosd(1)
  |
    <TAND> "(" EqualityExpression() ")" #Tand(1)
  |
    <SUM> "(" EqualityExpression() ")" #Sum(1)
  |
    <MIN> "(" EqualityExpression() ")" #Min(1)
  |
    <MAX> "(" EqualityExpression() ")" #Max(1)
  |
    <KURTOSIS> "(" EqualityExpression() ")" #Kurtosis(1)
  |
    <PRODUCT> "(" EqualityExpression() ")" #Product(1)
  |
    <SKEWNESS> "(" EqualityExpression() ")" #Skewness(1)
  |
    <STDDEV> "(" EqualityExpression() ")" #Stddev(1)
  |
    <VARIANCE> "(" EqualityExpression() ")" #Variance(1)
  */

  )
}

void Number()       :
{
    Token t;
}
{
    "-"/*@bgen(jjtree) #Neg( 1) */
        {
          ASTNeg jjtn001 = new ASTNeg(JJTNEG);
          boolean jjtc001 = true;
          jjtree.openNodeScope(jjtn001);
        }
        try {
/*@egen*/ Number()/*@bgen(jjtree)*/
        } catch (Throwable jjte001) {
          if (jjtc001) {
            jjtree.clearNodeScope(jjtn001);
            jjtc001 = false;
          } else {
            jjtree.popNode();
          }
          if (jjte001 instanceof RuntimeException) {
            throw (RuntimeException)jjte001;
          }
          if (jjte001 instanceof ParseException) {
            throw (ParseException)jjte001;
          }
          throw (Error)jjte001;
        } finally {
          if (jjtc001) {
            jjtree.closeNodeScope(jjtn001,  1);
          }
        }
/*@egen*/
   |/*@bgen(jjtree) Number */
   {
     ASTNumber jjtn002 = new ASTNumber(JJTNUMBER);
     boolean jjtc002 = true;
     jjtree.openNodeScope(jjtn002);
   }
   try {
/*@egen*/
   ((
        t=<INTEGER_LITERAL>/*@bgen(jjtree)*/
                            {
                              jjtree.closeNodeScope(jjtn002, true);
                              jjtc002 = false;
                            }
/*@egen*/ { jjtn002.setInteger(t.image, 10); }
    )
|   (
        t=<FLOAT>/*@bgen(jjtree)*/
                  {
                    jjtree.closeNodeScope(jjtn002, true);
                    jjtc002 = false;
                  }
/*@egen*/ { jjtn002.setFloat(t.image); }
    ))/*@bgen(jjtree)*/
   } finally {
     if (jjtc002) {
       jjtree.closeNodeScope(jjtn002, true);
     }
   }
/*@egen*/
}

TOKEN :
{
  < IDENTIFIER: "'" (<LETTER> (<LETTER>|<DIGIT>|" ")*) "'" >
|
  < #LETTER: ["_","a"-"z","A"-"Z", "[", "]"] >
|
  < #DIGIT: ["0"-"9"] >
}
