# Supplementary material
Source: MDPI journal article supplement (https://www.mdpi.com/2071-1050/2/5/1182)
Supplement: s1 [file s1 › Sustainability_Altaweel_EtAl/Client/bin/anl/aida/query/query_parser.jjt]

options {
  MULTI=true;
  STATIC=false;
  JDK_VERSION="1.6";
  
}

PARSER_BEGIN(Parser)
 package anl.mifs.query;

 import java.util.*;

public class Parser {

  public static void main(String args[]) {
    System.out.println("Reading from standard input...");
    Parser parser = new Parser(System.in);
    try {
      ASTstart n = parser.start();
      n.dump("");
       /*
      float val = n.evaluate();
      System.out.println("val = " + val);

      if (val == 0) System.out.println("FALSE");
      else if (val == 1) System.out.println("TRUE");
      else System.out.println("Unexpected value: " + val);
      */
      System.out.println("Thank you.");
    } catch (Exception e) {
      System.out.println("Oops.");
      System.out.println(e.getMessage());
      e.printStackTrace();
    }
  }
}

PARSER_END(Parser)


SKIP :
{
  " "
| "\t"
| "\n"
| "\r"
| <"//" (~["\n","\r"])* ("\n"|"\r"|"\r\n")>
| <"/*" (~["*"])* "*" (~["/"] (~["*"])* "*")* "/">
}

TOKEN : /* LITERALS */
{
  < INTEGER_LITERAL:
        <DECIMAL_LITERAL> (["l","L"])?
  >
  |
      < FLOAT:
          (["0"-"9"])+ "." (["0"-"9"])* (<EXPONENT>)? (["f", "F"])?
        | "." (["0"-"9"])+ (<EXPONENT>)? (["f", "F"])?
        | (["0"-"9"])+ <EXPONENT> (["f", "F"])?
        >
  |   < #EXPONENT: ["e","E"] (["+","-"])? (["0"-"9"])+ >

  | < #DECIMAL_LITERAL: ["1"-"9"] (["0"-"9"])* | "0" >
}

TOKEN: /* operators */
{
    < GREATER: ">" >
|   < LESS: "<" >
|   < EQEQUAL: "==" >
|   < EQLESS: "<=" >
|   < EQGREATER: ">=" >
|   < NOT_EQUAL: "!=" >
|   < PLUS: "+" >
|   < MINUS: "-" >
|   < TIMES: "*" >
|   < DIV: "/" >
|   < MOD: "%" >
|   < POW: "**" >
|	<AND: "and">
|	<OR: "or">
}

TOKEN: /* functions */
{

  < COUNT: "count" >
| < MEAN: "mean" >
/*
| < ABS: "abs" >
| < SQRT: "sqrt" >
| < SQR: "sqr" >
| < LOG: "log10" >
| < EXP: "exp" >
| < LN: "log" >
| < SIN: "sin" >
| < COS: "cos" >
| < TAN: "tan" >
| < SIND: "sind" >
| < COSD: "cosd" >
| < TAND: "tand" >
| < SUM: "sum" >
| < MIN: "min" >
| < MAX: "max" >
| < KURTOSIS: "kurtosis" >
| < PRODUCT: "product" >
| < SKEWNESS: "skewness" >
| < STDDEV: "stddev" >
| < VARIANCE: "variance" >
*/
}


TOKEN: /* numerical constants */
{
	< E: "E" >
| < PI: "PI" >
}

ASTstart start() : {}
{
  AndOrExpression() ";"
  { return jjtThis; }
}

void AndOrExpression() #void:
{}
{
	EqualityExpression()
	(
		<AND> EqualityExpression() #And(2)
	|
		<OR> EqualityExpression() #Or(2)
	)*	
}

void EqualityExpression() #void :
{}
{
  RelationalExpression()
  (
     <EQEQUAL> RelationalExpression() #EqEqual(2)
   |
     <NOT_EQUAL> RelationalExpression() #NotEqual(2)
  )*
}

void RelationalExpression() #void :
{}
{
  AdditiveExpression()
  (
    <LESS> AdditiveExpression() #LessThan(2)
   |
    <GREATER> AdditiveExpression() #GreaterThan(2)
   |
    <EQLESS> AdditiveExpression() #LessEq(2)
   |
    <EQGREATER> AdditiveExpression() #GreaterEq(2)
  )*
}

void AdditiveExpression() #void :
{}
{
  MultiplicativeExpression()
  (
    <PLUS> MultiplicativeExpression() #Add(2)
   |
    <MINUS> MultiplicativeExpression() #Subtract(2)
  )*
}

void MultiplicativeExpression() #void :
{}
{
	powExpression()
  (
    <TIMES> powExpression() #Mul(2)
   |
    <DIV> powExpression() #Div(2)
   |
    <MOD> powExpression() #Mod(2)
  )*
}

void powExpression() #void :
{}
{
	UnaryExpression()
	(
		<POW> UnaryExpression() #Pow(2)
	)*
}

void UnaryExpression() #void : {}
{
  "(" EqualityExpression() ")"
  |
  Func()
  |
  Var()
  |
  Number()
}

void Var() #void :
{
  Token t;
}
{
		t=<E> #E
	|
		t=<PI> #PI
	|
  t=<IDENTIFIER>
  {
    jjtThis.setName(t.image);
  } #Var
}

void QuotedVar() #void : {}
{
	"'" Var() "'"
}

void VarList() #VarList: {}
{
	Var()
	("," Var()
	)*

}

void Func() # void:
{}
{
  (
    <COUNT> "(" VarList() ")" #Count(1)
  |
    <MEAN> "(" EqualityExpression() ")" #Mean(1)
  
  /*
    <ABS> "(" EqualityExpression() ")" #Abs(1)
  |
    <SQRT> "(" EqualityExpression() ")" #Sqrt(1)
  |
    <SQR> "(" EqualityExpression() ")" #Sqr(1)
  |
    <LOG> "(" EqualityExpression() ")" #Log(1)
  |
    <EXP> "(" EqualityExpression() ")" #Exp(1)
  |
    <LN> "(" EqualityExpression() ")" #Ln(1)
  |
    <SIN> "(" EqualityExpression() ")" #Sin(1)
  |
    <COS> "(" EqualityExpression() ")" #Cos(1)
  |
    <TAN> "(" EqualityExpression() ")" #Tan(1)
  |
    <SIND> "(" EqualityExpression() ")" #Sind(1)
  |
    <COSD> "(" EqualityExpression() ")" #Cosd(1)
  |
    <TAND> "(" EqualityExpression() ")" #Tand(1)
  |
    <SUM> "(" EqualityExpression() ")" #Sum(1)
  |
    <MIN> "(" EqualityExpression() ")" #Min(1)
  |
    <MAX> "(" EqualityExpression() ")" #Max(1)
  |
    <KURTOSIS> "(" EqualityExpression() ")" #Kurtosis(1)
  |
    <PRODUCT> "(" EqualityExpression() ")" #Product(1)
  |
    <SKEWNESS> "(" EqualityExpression() ")" #Skewness(1)
  |
    <STDDEV> "(" EqualityExpression() ")" #Stddev(1)
  |
    <VARIANCE> "(" EqualityExpression() ")" #Variance(1)
  */

  )
}

void Number() #void :
{
    Token t;
}
{
    "-" Number() #Neg(1)
   |
   ((
        t=<INTEGER_LITERAL> { jjtThis.setInteger(t.image, 10); }
    )
|   (
        t=<FLOAT> { jjtThis.setFloat(t.image); }
    ))#Number
}

TOKEN :
{
  < IDENTIFIER: "'" (<LETTER> (<LETTER>|<DIGIT>|" ")*) "'" >
|
  < #LETTER: ["_","a"-"z","A"-"Z", "[", "]"] >
|
  < #DIGIT: ["0"-"9"] >
}
