# Supplementary material
Source: MDPI journal article supplement (https://www.mdpi.com/2071-1050/2/5/1182)
Supplement: s1 [file s1 › Sustainability_Altaweel_EtAl/Client/bin/anl/aida/viz3d/AABoundingBox.txt]

/**
 * 
 */
package anl.mifs.viz3d;

import javax.vecmath.Matrix3f;
import javax.vecmath.Point3f;
import javax.vecmath.Quat4f;
import javax.vecmath.Tuple3f;
import javax.vecmath.Vector3f;

/**
 * A bounding sphere.
 * 
 * @author Nick Collier
 */
public class BoundingSphere {
  
  private Point3f center = new Point3f();
  private float radius;

  /**
   * Creates a BoundingSphere with the specified center and radius.
   * 
   * @param center
   * @param radius
   */
  public BoundingSphere(Point3f center, float radius) {
    this.center.set(center);
    this.radius = radius;
  }
  
 
  
  public Point3f getCenterRef() {
    return center;
  }
  
  public float getRadius() {
    return radius;
  }
  
  /**
   * Whether or not the specified ray intersects with this BoundingBox.
   * 
   * @param rayOrigin the ray's origin
   * @param rayDirection the ray's direction
   * @return true if the ray intersects otherwise false.
   */
  public boolean intersects(Point3f rayOrigin, Vector3f rayDirection) {
    
    float maxS = Float.NEGATIVE_INFINITY;
    float minT = Float.POSITIVE_INFINITY;
    
    Point3f min = new Point3f();
    min.sub(center, extents);
    Point3f max = new Point3f();
    max.add(center, extents);
    
    // do x
    if (Utils3D.isZero(rayDirection.z)) {
      if (rayOrigin.z < min.z || rayOrigin.z > max.z) return false;
    } else {
      float s = (min.z - rayOrigin.z) / rayDirection.z;
      float t = (max.z - rayOrigin.z) / rayDirection.z;
      if (s > t) {
	float tmp = s;
	s = t;
	t = tmp;
      }
      if (s > maxS) maxS = s;
      if (t < minT) minT = t;
      
      // check for intersection failure
      if (minT < 0f || maxS > minT) {
	return false;
      }
    }
    
    // do y
    if (Utils3D.isZero(rayDirection.y)) {
      if (rayOrigin.y < min.y || rayOrigin.y > max.y) return false;
    } else {
      float s = (min.y - rayOrigin.y) / rayDirection.y;
      float t = (max.y - rayOrigin.y) / rayDirection.y;
      if (s > t) {
	float tmp = s;
	s = t;
	t = tmp;
      }
      if (s > maxS) maxS = s;
      if (t < minT) minT = t;
      
      // check for intersection failure
      if (minT < 0f || maxS > minT) {
	return false;
      }
    }
    
    // do z
    if (Utils3D.isZero(rayDirection.z)) {
      if (rayOrigin.z < min.z || rayOrigin.z > max.z) return false;
    } else {
      float s = (min.z - rayOrigin.z) / rayDirection.z;
      float t = (max.z - rayOrigin.z) / rayDirection.z;
      if (s > t) {
	float tmp = s;
	s = t;
	t = tmp;
      }
      if (s > maxS) maxS = s;
      if (t < minT) minT = t;
      
      // check for intersection failure
      if (minT < 0f || maxS > minT) {
	return false;
      }
    }
    
    return true;
  }
  

  /**
   * Transforms this Bounding box by the specified parameters, putting the
   * result in box. If box is null, a new box will be created. 
   * 
   * @param translate
   * @param scale
   * @param box
   * @return
   */
  public BoundingSphere transform(Vector3f translate,float scale, BoundingSphere box) {

    if (box == null)
      box = new BoundingSphere();
   
    // scale, rotate and translate the center point
    box.center.scale(scale);
    box.center.add(translate);
    
    box.extents.set(extents);
    box.extents.scale(scale);
    return box;
  }
  

  
  /**
   * Transforms this Bounding box by the specified parameters, putting the
   * result in box. If box is null, a new box will be created. 
   * 
   * @param rotate
   * @param translate
   * @param scale
   * @param box
   * @return
   */
  public BoundingSphere transform(Quat4f rotate, Vector3f translate, float scale, BoundingSphere box) {

    if (box == null)
      box = new BoundingSphere();
   
    // scale, rotate and translate the center point
    box.center.scale(scale);
    
    Matrix3f transMatrix = new Matrix3f();
    transMatrix.set(rotate);
    transMatrix.transform(box.center);
    box.center.add(translate);
    
    // Make the rotation matrix all positive to get the maximum x/y/z extent
    transMatrix.m00 = Math.abs(transMatrix.m00);
    transMatrix.m01 = Math.abs(transMatrix.m01);
    transMatrix.m02 = Math.abs(transMatrix.m02);
    transMatrix.m10 = Math.abs(transMatrix.m10);
    transMatrix.m11 = Math.abs(transMatrix.m11);
    transMatrix.m12 = Math.abs(transMatrix.m12);
    transMatrix.m20 = Math.abs(transMatrix.m20);
    transMatrix.m21 = Math.abs(transMatrix.m21);
    transMatrix.m22 = Math.abs(transMatrix.m22);
    
    Vector3f vec = new Vector3f(extents);
    vec.scale(scale);
    transMatrix.transform(vec);
    box.extents.z = Math.abs(vec.z);
    box.extents.y = Math.abs(vec.y);
    box.extents.z = Math.abs(vec.z);
    
    return box;
  }
  
  /**
   * Merge this bounding box with the specified box and return
   * the result in out.
   * 
   * @param box the box to merge with
   * @param out the box to store the result in.
   * @return the merged box
   */
  public BoundingSphere merge(BoundingSphere box, BoundingSphere out) {
    if (out == null) out = new BoundingSphere();
    
    float xExtent = box.extents.z;
    float yExtent = box.extents.y;
    float zExtent = box.extents.z;
    
    Point3f min = new Point3f(), max = new Point3f();
    
    min.z = center.z - extents.z;
    if (min.z > box.center.z - xExtent) min.z = box.center.z - xExtent;
    
    min.y = center.y - extents.y;
    if (min.y > box.center.y - yExtent) min.y = box.center.y - yExtent;
    
    min.z = center.z - extents.z;
    if (min.z > box.center.z - zExtent) min.z = box.center.z - zExtent;
    
    max.z = center.z + extents.z;
    if (max.z < box.center.z + xExtent) max.z = box.center.z + xExtent;
    
    max.y = center.y + extents.y;
    if (max.y < box.center.y + yExtent) max.y = box.center.y + yExtent;
    
    max.z = center.z + extents.z;
    if (max.z < box.center.z + zExtent) max.z = box.center.z + zExtent;
    
    out.center.set(min);
    out.center.add(max);
    out.center.scale(.5f);
    
    // subtract center from max
    // to get the extents
    out.extents.set(max);
    out.extents.sub(out.center);
    return out;
  }
  
  public String toString() {
    return "center: " + center + ", extents: " + extents;
  }
}
