# Supplementary material
Source: MDPI journal article supplement (https://www.mdpi.com/2071-1050/2/5/1182)
Supplement: s1 [file s1 › Sustainability_Altaweel_EtAl/Client/boot.properties]

pluginFolders=./, ./saf_runtime, ./saf_ui

# plugin file name
org.java.plugin.boot.pluginFileName = plugin_jpf.xml
# Plug-in life cycle handler implementation
#org.java.plugin.standard.PluginLifecycleHandler = repast.simphony.plugin.PluginLifecycleHandler

log4j.rootLogger=WARN, console, R

log4j.appender.console = org.apache.log4j.ConsoleAppender
log4j.appender.console.layout = org.apache.log4j.PatternLayout
log4j.appender.console.layout.conversionPattern = %d [%t] %-5p %c %m%n

log4j.appender.R=org.apache.log4j.RollingFileAppender
log4j.appender.R.File=${user.home}/.aida/aida_client.log
log4j.appender.R.MaxFileSize=100KB
log4j.appender.R.MaxBackupIndex=1
log4j.appender.R.layout=org.apache.log4j.PatternLayout
log4j.appender.R.layout.ConversionPattern=%d [%t] %-5p %c %m%n
