# Supplementary material
Source: MDPI journal article supplement (https://www.mdpi.com/2071-1050/2/5/1182)
Supplement: s1 [file s1 › Sustainability_Altaweel_EtAl/Client/build.properties]

projects.dir = ${basedir}/..
wkspace.dir = ${projects.dir}/..
common.dir = ${wkspace.dir}/common
bin.includes = plugin_jpf.xml,\
               lib/,\
               plugin.properties,\
               bin/,\
               plugin.xml,\
               saf_runtime/,\
               saf_ui/,\
               .classpath
src.includes = src/,\
               test/
jars.compile.order = saf_runtime/,\
                     lib/,\
                     saf_ui/
source.saf_runtime/ = 
source.lib/ = 
source.saf_ui/ = 
