# Supplementary material
Source: MDPI journal article supplement (https://www.mdpi.com/2071-1050/2/5/1182)
Supplement: s1 [file s1 › Sustainability_Altaweel_EtAl/Client/cache_Iowa/cache.xml]

<!-- paths are relative to the location of this file -->
<cache lucene_index="index">
	<range>
		<start>1235887200205</start>
		<length>245</length>
		<interval>7</interval>
	</range>
	<cache_items>
		<cache_item>stc_090301_091101.bin</cache_item>
		<cache_item>stc_090301_090308.bin</cache_item>
		<cache_item>stc_090302_090309.bin</cache_item>
		<cache_item>stc_090303_090310.bin</cache_item>
		<cache_item>stc_090304_090311.bin</cache_item>
		<cache_item>stc_090305_090312.bin</cache_item>
		<cache_item>stc_090306_090313.bin</cache_item>
		<cache_item>stc_090307_090314.bin</cache_item>
		<cache_item>stc_090308_090315.bin</cache_item>
		<cache_item>stc_090309_090316.bin</cache_item>
		<cache_item>stc_090310_090317.bin</cache_item>
		<cache_item>stc_090311_090318.bin</cache_item>
		<cache_item>stc_090312_090319.bin</cache_item>
		<cache_item>stc_090313_090320.bin</cache_item>
		<cache_item>stc_090314_090321.bin</cache_item>
		<cache_item>stc_090315_090322.bin</cache_item>
		<cache_item>stc_090316_090323.bin</cache_item>
		<cache_item>stc_090317_090324.bin</cache_item>
		<cache_item>stc_090318_090325.bin</cache_item>
		<cache_item>stc_090319_090326.bin</cache_item>
		<cache_item>stc_090320_090327.bin</cache_item>
		<cache_item>stc_090321_090328.bin</cache_item>
		<cache_item>stc_090322_090329.bin</cache_item>
		<cache_item>stc_090323_090330.bin</cache_item>
		<cache_item>stc_090324_090331.bin</cache_item>
		<cache_item>stc_090325_090401.bin</cache_item>
		<cache_item>stc_090326_090402.bin</cache_item>
		<cache_item>stc_090327_090403.bin</cache_item>
		<cache_item>stc_090328_090404.bin</cache_item>
		<cache_item>stc_090329_090405.bin</cache_item>
		<cache_item>stc_090330_090406.bin</cache_item>
		<cache_item>stc_090331_090407.bin</cache_item>
		<cache_item>stc_090401_090408.bin</cache_item>
		<cache_item>stc_090402_090409.bin</cache_item>
		<cache_item>stc_090403_090410.bin</cache_item>
		<cache_item>stc_090404_090411.bin</cache_item>
		<cache_item>stc_090405_090412.bin</cache_item>
		<cache_item>stc_090406_090413.bin</cache_item>
		<cache_item>stc_090407_090414.bin</cache_item>
		<cache_item>stc_090408_090415.bin</cache_item>
		<cache_item>stc_090409_090416.bin</cache_item>
		<cache_item>stc_090410_090417.bin</cache_item>
		<cache_item>stc_090411_090418.bin</cache_item>
		<cache_item>stc_090412_090419.bin</cache_item>
		<cache_item>stc_090413_090420.bin</cache_item>
		<cache_item>stc_090414_090421.bin</cache_item>
		<cache_item>stc_090415_090422.bin</cache_item>
		<cache_item>stc_090416_090423.bin</cache_item>
		<cache_item>stc_090417_090424.bin</cache_item>
		<cache_item>stc_090418_090425.bin</cache_item>
		<cache_item>stc_090419_090426.bin</cache_item>
		<cache_item>stc_090420_090427.bin</cache_item>
		<cache_item>stc_090421_090428.bin</cache_item>
		<cache_item>stc_090422_090429.bin</cache_item>
		<cache_item>stc_090423_090430.bin</cache_item>
		<cache_item>stc_090424_090501.bin</cache_item>
		<cache_item>stc_090425_090502.bin</cache_item>
		<cache_item>stc_090426_090503.bin</cache_item>
		<cache_item>stc_090427_090504.bin</cache_item>
		<cache_item>stc_090428_090505.bin</cache_item>
		<cache_item>stc_090429_090506.bin</cache_item>
		<cache_item>stc_090430_090507.bin</cache_item>
		<cache_item>stc_090501_090508.bin</cache_item>
		<cache_item>stc_090502_090509.bin</cache_item>
		<cache_item>stc_090503_090510.bin</cache_item>
		<cache_item>stc_090504_090511.bin</cache_item>
		<cache_item>stc_090505_090512.bin</cache_item>
		<cache_item>stc_090506_090513.bin</cache_item>
		<cache_item>stc_090507_090514.bin</cache_item>
		<cache_item>stc_090508_090515.bin</cache_item>
		<cache_item>stc_090509_090516.bin</cache_item>
		<cache_item>stc_090510_090517.bin</cache_item>
		<cache_item>stc_090511_090518.bin</cache_item>
		<cache_item>stc_090512_090519.bin</cache_item>
		<cache_item>stc_090513_090520.bin</cache_item>
		<cache_item>stc_090514_090521.bin</cache_item>
		<cache_item>stc_090515_090522.bin</cache_item>
		<cache_item>stc_090516_090523.bin</cache_item>
		<cache_item>stc_090517_090524.bin</cache_item>
		<cache_item>stc_090518_090525.bin</cache_item>
		<cache_item>stc_090519_090526.bin</cache_item>
		<cache_item>stc_090520_090527.bin</cache_item>
		<cache_item>stc_090521_090528.bin</cache_item>
		<cache_item>stc_090522_090529.bin</cache_item>
		<cache_item>stc_090523_090530.bin</cache_item>
		<cache_item>stc_090524_090531.bin</cache_item>
		<cache_item>stc_090525_090601.bin</cache_item>
		<cache_item>stc_090526_090602.bin</cache_item>
		<cache_item>stc_090527_090603.bin</cache_item>
		<cache_item>stc_090528_090604.bin</cache_item>
		<cache_item>stc_090529_090605.bin</cache_item>
		<cache_item>stc_090530_090606.bin</cache_item>
		<cache_item>stc_090531_090607.bin</cache_item>
		<cache_item>stc_090601_090608.bin</cache_item>
		<cache_item>stc_090602_090609.bin</cache_item>
		<cache_item>stc_090603_090610.bin</cache_item>
		<cache_item>stc_090604_090611.bin</cache_item>
		<cache_item>stc_090605_090612.bin</cache_item>
		<cache_item>stc_090606_090613.bin</cache_item>
		<cache_item>stc_090607_090614.bin</cache_item>
		<cache_item>stc_090608_090615.bin</cache_item>
		<cache_item>stc_090609_090616.bin</cache_item>
		<cache_item>stc_090610_090617.bin</cache_item>
		<cache_item>stc_090611_090618.bin</cache_item>
		<cache_item>stc_090612_090619.bin</cache_item>
		<cache_item>stc_090613_090620.bin</cache_item>
		<cache_item>stc_090614_090621.bin</cache_item>
		<cache_item>stc_090615_090622.bin</cache_item>
		<cache_item>stc_090616_090623.bin</cache_item>
		<cache_item>stc_090617_090624.bin</cache_item>
		<cache_item>stc_090618_090625.bin</cache_item>
		<cache_item>stc_090619_090626.bin</cache_item>
		<cache_item>stc_090620_090627.bin</cache_item>
		<cache_item>stc_090621_090628.bin</cache_item>
		<cache_item>stc_090622_090629.bin</cache_item>
		<cache_item>stc_090623_090630.bin</cache_item>
		<cache_item>stc_090624_090701.bin</cache_item>
		<cache_item>stc_090625_090702.bin</cache_item>
		<cache_item>stc_090626_090703.bin</cache_item>
		<cache_item>stc_090627_090704.bin</cache_item>
		<cache_item>stc_090628_090705.bin</cache_item>
		<cache_item>stc_090629_090706.bin</cache_item>
		<cache_item>stc_090630_090707.bin</cache_item>
		<cache_item>stc_090701_090708.bin</cache_item>
		<cache_item>stc_090702_090709.bin</cache_item>
		<cache_item>stc_090703_090710.bin</cache_item>
		<cache_item>stc_090704_090711.bin</cache_item>
		<cache_item>stc_090705_090712.bin</cache_item>
		<cache_item>stc_090706_090713.bin</cache_item>
		<cache_item>stc_090707_090714.bin</cache_item>
		<cache_item>stc_090708_090715.bin</cache_item>
		<cache_item>stc_090709_090716.bin</cache_item>
		<cache_item>stc_090710_090717.bin</cache_item>
		<cache_item>stc_090711_090718.bin</cache_item>
		<cache_item>stc_090712_090719.bin</cache_item>
		<cache_item>stc_090713_090720.bin</cache_item>
		<cache_item>stc_090714_090721.bin</cache_item>
		<cache_item>stc_090715_090722.bin</cache_item>
		<cache_item>stc_090716_090723.bin</cache_item>
		<cache_item>stc_090717_090724.bin</cache_item>
		<cache_item>stc_090718_090725.bin</cache_item>
		<cache_item>stc_090719_090726.bin</cache_item>
		<cache_item>stc_090720_090727.bin</cache_item>
		<cache_item>stc_090721_090728.bin</cache_item>
		<cache_item>stc_090722_090729.bin</cache_item>
		<cache_item>stc_090723_090730.bin</cache_item>
		<cache_item>stc_090724_090731.bin</cache_item>
		<cache_item>stc_090725_090801.bin</cache_item>
		<cache_item>stc_090726_090802.bin</cache_item>
		<cache_item>stc_090727_090803.bin</cache_item>
		<cache_item>stc_090728_090804.bin</cache_item>
		<cache_item>stc_090729_090805.bin</cache_item>
		<cache_item>stc_090730_090806.bin</cache_item>
		<cache_item>stc_090731_090807.bin</cache_item>
		<cache_item>stc_090801_090808.bin</cache_item>
		<cache_item>stc_090802_090809.bin</cache_item>
		<cache_item>stc_090803_090810.bin</cache_item>
		<cache_item>stc_090804_090811.bin</cache_item>
		<cache_item>stc_090805_090812.bin</cache_item>
		<cache_item>stc_090806_090813.bin</cache_item>
		<cache_item>stc_090807_090814.bin</cache_item>
		<cache_item>stc_090808_090815.bin</cache_item>
		<cache_item>stc_090809_090816.bin</cache_item>
		<cache_item>stc_090810_090817.bin</cache_item>
		<cache_item>stc_090811_090818.bin</cache_item>
		<cache_item>stc_090812_090819.bin</cache_item>
		<cache_item>stc_090813_090820.bin</cache_item>
		<cache_item>stc_090814_090821.bin</cache_item>
		<cache_item>stc_090815_090822.bin</cache_item>
		<cache_item>stc_090816_090823.bin</cache_item>
		<cache_item>stc_090817_090824.bin</cache_item>
		<cache_item>stc_090818_090825.bin</cache_item>
		<cache_item>stc_090819_090826.bin</cache_item>
		<cache_item>stc_090820_090827.bin</cache_item>
		<cache_item>stc_090821_090828.bin</cache_item>
		<cache_item>stc_090822_090829.bin</cache_item>
		<cache_item>stc_090823_090830.bin</cache_item>
		<cache_item>stc_090824_090831.bin</cache_item>
		<cache_item>stc_090825_090901.bin</cache_item>
		<cache_item>stc_090826_090902.bin</cache_item>
		<cache_item>stc_090827_090903.bin</cache_item>
		<cache_item>stc_090828_090904.bin</cache_item>
		<cache_item>stc_090829_090905.bin</cache_item>
		<cache_item>stc_090830_090906.bin</cache_item>
		<cache_item>stc_090831_090907.bin</cache_item>
		<cache_item>stc_090901_090908.bin</cache_item>
		<cache_item>stc_090902_090909.bin</cache_item>
		<cache_item>stc_090903_090910.bin</cache_item>
		<cache_item>stc_090904_090911.bin</cache_item>
		<cache_item>stc_090905_090912.bin</cache_item>
		<cache_item>stc_090906_090913.bin</cache_item>
		<cache_item>stc_090907_090914.bin</cache_item>
		<cache_item>stc_090908_090915.bin</cache_item>
		<cache_item>stc_090909_090916.bin</cache_item>
		<cache_item>stc_090910_090917.bin</cache_item>
		<cache_item>stc_090911_090918.bin</cache_item>
		<cache_item>stc_090912_090919.bin</cache_item>
		<cache_item>stc_090913_090920.bin</cache_item>
		<cache_item>stc_090914_090921.bin</cache_item>
		<cache_item>stc_090915_090922.bin</cache_item>
		<cache_item>stc_090916_090923.bin</cache_item>
		<cache_item>stc_090917_090924.bin</cache_item>
		<cache_item>stc_090918_090925.bin</cache_item>
		<cache_item>stc_090919_090926.bin</cache_item>
		<cache_item>stc_090920_090927.bin</cache_item>
		<cache_item>stc_090921_090928.bin</cache_item>
		<cache_item>stc_090922_090929.bin</cache_item>
		<cache_item>stc_090923_090930.bin</cache_item>
		<cache_item>stc_090924_091001.bin</cache_item>
		<cache_item>stc_090925_091002.bin</cache_item>
		<cache_item>stc_090926_091003.bin</cache_item>
		<cache_item>stc_090927_091004.bin</cache_item>
		<cache_item>stc_090928_091005.bin</cache_item>
		<cache_item>stc_090929_091006.bin</cache_item>
		<cache_item>stc_090930_091007.bin</cache_item>
		<cache_item>stc_091001_091008.bin</cache_item>
		<cache_item>stc_091002_091009.bin</cache_item>
		<cache_item>stc_091003_091010.bin</cache_item>
		<cache_item>stc_091004_091011.bin</cache_item>
		<cache_item>stc_091005_091012.bin</cache_item>
		<cache_item>stc_091006_091013.bin</cache_item>
		<cache_item>stc_091007_091014.bin</cache_item>
		<cache_item>stc_091008_091015.bin</cache_item>
		<cache_item>stc_091009_091016.bin</cache_item>
		<cache_item>stc_091010_091017.bin</cache_item>
		<cache_item>stc_091011_091018.bin</cache_item>
		<cache_item>stc_091012_091019.bin</cache_item>
		<cache_item>stc_091013_091020.bin</cache_item>
		<cache_item>stc_091014_091021.bin</cache_item>
		<cache_item>stc_091015_091022.bin</cache_item>
		<cache_item>stc_091016_091023.bin</cache_item>
		<cache_item>stc_091017_091024.bin</cache_item>
		<cache_item>stc_091018_091025.bin</cache_item>
		<cache_item>stc_091019_091026.bin</cache_item>
		<cache_item>stc_091020_091027.bin</cache_item>
		<cache_item>stc_091021_091028.bin</cache_item>
		<cache_item>stc_091022_091029.bin</cache_item>
		<cache_item>stc_091023_091030.bin</cache_item>
		<cache_item>stc_091024_091031.bin</cache_item>
		<cache_item>stc_091025_091101.bin</cache_item>
	</cache_items>
	<keywords>
		<keyword_set name="Agriculture">
			<keyword>
				<term>vegetables</term>
				<label>Vegetables</label>
			</keyword>
			<keyword>
				<term>sheep</term>
				<label>Sheep</label>
			</keyword>
			<keyword>
				<term>meadow</term>
				<label>Meadow</label>
			</keyword>
			<keyword>
				<term>alfalfa</term>
				<label>Alfalfa</label>
			</keyword>
			<keyword>
				<term>pasture</term>
				<label>Pasture</label>
			</keyword>
			<keyword>
				<term>cultivate</term>
				<label>Cultivate</label>
			</keyword>
			<keyword>
				<term>irrigation</term>
				<label>Irrigation</label>
			</keyword>
			<keyword>
				<term>crops</term>
				<label>Crops</label>
			</keyword>
			<keyword>
				<term>agrarian</term>
				<label>Agrarian</label>
			</keyword>
			<keyword>
				<term>planting</term>
				<label>Planting</label>
			</keyword>
			<keyword>
				<term>corn</term>
				<label>Corn</label>
			</keyword>
			<keyword>
				<term>food production</term>
				<label>Food Production</label>
			</keyword>
			<keyword>
				<term>straw</term>
				<label>Straw</label>
			</keyword>
			<keyword>
				<term>sunflower</term>
				<label>Sunflower</label>
			</keyword>
			<keyword>
				<term>ethanol</term>
				<label>Ethanol</label>
			</keyword>
			<keyword>
				<term>prune</term>
				<label>Prune</label>
			</keyword>
			<keyword>
				<term>sowing</term>
				<label>Sowing</label>
			</keyword>
			<keyword>
				<term>crop</term>
				<label>Crop</label>
			</keyword>
			<keyword>
				<term>rake</term>
				<label>Rake</label>
			</keyword>
			<keyword>
				<term>grazing</term>
				<label>Grazing</label>
			</keyword>
			<keyword>
				<term>farmer</term>
				<label>Farmer</label>
			</keyword>
			<keyword>
				<term>farming</term>
				<label>Farming</label>
			</keyword>
			<keyword>
				<term>fertilizer</term>
				<label>Fertilizer</label>
			</keyword>
			<keyword>
				<term>cattle</term>
				<label>Cattle</label>
			</keyword>
			<keyword>
				<term>sow</term>
				<label>Sow</label>
			</keyword>
			<keyword>
				<term>soy</term>
				<label>Soy</label>
			</keyword>
			<keyword>
				<term>farm</term>
				<label>Farm</label>
			</keyword>
			<keyword>
				<term>tilling</term>
				<label>Tilling</label>
			</keyword>
			<keyword>
				<term>organic</term>
				<label>Organic</label>
			</keyword>
			<keyword>
				<term>ox</term>
				<label>Ox</label>
			</keyword>
			<keyword>
				<term>agriculture</term>
				<label>Agriculture</label>
			</keyword>
			<keyword>
				<term>biofuel</term>
				<label>Biofuel</label>
			</keyword>
			<keyword>
				<term>pesticide</term>
				<label>Pesticide</label>
			</keyword>
			<keyword>
				<term>herb</term>
				<label>Herb</label>
			</keyword>
			<keyword>
				<term>herd</term>
				<label>Herd</label>
			</keyword>
			<keyword>
				<term>glean</term>
				<label>Glean</label>
			</keyword>
			<keyword>
				<term>reap</term>
				<label>Reap</label>
			</keyword>
			<keyword>
				<term>crop yield</term>
				<label>Crop Yield</label>
			</keyword>
			<keyword>
				<term>yield</term>
				<label>Yield</label>
			</keyword>
			<keyword>
				<term>department of agriculture</term>
				<label>Department of Agriculture</label>
			</keyword>
			<keyword>
				<term>agricultural</term>
				<label>Agricultural</label>
			</keyword>
			<keyword>
				<term>plant food</term>
				<label>Plant Food</label>
			</keyword>
			<keyword>
				<term>animal husbandry</term>
				<label>Animal Husbandry</label>
			</keyword>
			<keyword>
				<term>producer</term>
				<label>Producer</label>
			</keyword>
			<keyword>
				<term>range</term>
				<label>Range</label>
			</keyword>
			<keyword>
				<term>herbicide</term>
				<label>Herbicide</label>
			</keyword>
			<keyword>
				<term>countryside</term>
				<label>Countryside</label>
			</keyword>
			<keyword>
				<term>agribusiness</term>
				<label>Agribusiness</label>
			</keyword>
			<keyword>
				<term>insecticide</term>
				<label>Insecticide</label>
			</keyword>
			<keyword>
				<term>seed</term>
				<label>Seed</label>
			</keyword>
			<keyword>
				<term>till</term>
				<label>Till</label>
			</keyword>
			<keyword>
				<term>cereal</term>
				<label>Cereal</label>
			</keyword>
			<keyword>
				<term>horticulture</term>
				<label>Horticulture</label>
			</keyword>
			<keyword>
				<term>livestock</term>
				<label>Livestock</label>
			</keyword>
			<keyword>
				<term>harvest</term>
				<label>Harvest</label>
			</keyword>
			<keyword>
				<term>hey</term>
				<label>Hey</label>
			</keyword>
			<keyword>
				<term>grain</term>
				<label>Grain</label>
			</keyword>
			<keyword>
				<term>free range</term>
				<label>Free Range</label>
			</keyword>
			<keyword>
				<term>wheat</term>
				<label>Wheat</label>
			</keyword>
			<keyword>
				<term>browse</term>
				<label>Browse</label>
			</keyword>
			<keyword>
				<term>cow</term>
				<label>Cow</label>
			</keyword>
			<keyword>
				<term>harvesting</term>
				<label>Harvesting</label>
			</keyword>
		</keyword_set>
		<keyword_set name="Other">
			<keyword>
				<term>land use</term>
				<label>Land Use</label>
			</keyword>
			<keyword>
				<term>desert</term>
				<label>Desert</label>
			</keyword>
			<keyword>
				<term>planning</term>
				<label>Planning</label>
			</keyword>

			<keyword>
				<term>service</term>
				<label>Service</label>
			</keyword>
			<keyword>
				<term>channel</term>
				<label>Channel</label>
			</keyword>
			<keyword>
				<term>growth</term>
				<label>Growth</label>
			</keyword>
			<keyword>
				<term>land</term>
				<label>Land</label>
			</keyword>
			<keyword>
				<term>judicial</term>
				<label>Judicial</label>
			</keyword>
			<keyword>
				<term>rainfall</term>
				<label>Rainfall</label>
			</keyword>
			<keyword>
				<term>ground</term>
				<label>Ground</label>
			</keyword>
			<keyword>
				<term>water supply</term>
				<label>Water Supply</label>
			</keyword>
			<keyword>
				<term>petition</term>
				<label>Petition</label>
			</keyword>
			<keyword>
				<term>territory</term>
				<label>Territory</label>
			</keyword>
			<keyword>
				<term>development</term>
				<label>Development</label>
			</keyword>
			<keyword>
				<term>lawmaker</term>
				<label>Lawmaker</label>
			</keyword>
			<keyword>
				<term>wind energy</term>
				<label>Wind Energy</label>
			</keyword>
			<keyword>
				<term>repair</term>
				<label>Repair</label>
			</keyword>
			<keyword>
				<term>soil</term>
				<label>Soil</label>
			</keyword>
			<keyword>
				<term>emergency</term>
				<label>Emergency</label>
			</keyword>
			<keyword>
				<term>rural</term>
				<label>Rural</label>
			</keyword>
			<keyword>
				<term>dormant</term>
				<label>Dormant</label>
			</keyword>
			<keyword>
				<term>fire</term>
				<label>Fire</label>
			</keyword>
			<keyword>
				<term>board</term>
				<label>Board</label>
			</keyword>
			<keyword>
				<term>zone</term>
				<label>Zone</label>
			</keyword>
			<keyword>
				<term>lake</term>
				<label>Lake</label>
			</keyword>
			<keyword>
				<term>cut down</term>
				<label>Cut Down</label>
			</keyword>
			<keyword>
				<term>fuel</term>
				<label>Fuel</label>
			</keyword>
			<keyword>
				<term>official</term>
				<label>Official</label>
			</keyword>
			<keyword>
				<term>flood</term>
				<label>Flood</label>
			</keyword>
			<keyword>
				<term>committee</term>
				<label>Committee</label>
			</keyword>
			<keyword>
				<term>zoning</term>
				<label>Zoning</label>
			</keyword>
			<keyword>
				<term>raise</term>
				<label>Raise</label>
			</keyword>
			<keyword>
				<term>sewer</term>
				<label>Sewer</label>
			</keyword>
			<keyword>
				<term>ordinance</term>
				<label>Ordinance</label>
			</keyword>
			<keyword>
				<term>disappear</term>
				<label>Disappear</label>
			</keyword>
			<keyword>
				<term>overhaul</term>
				<label>Overhaul</label>
			</keyword>
			<keyword>
				<term>outgrowth</term>
				<label>Outgrowth</label>
			</keyword>
			<keyword>
				<term>canal</term>
				<label>Canal</label>
			</keyword>
			<keyword>
				<term>senator</term>
				<label>Senator</label>
			</keyword>
			<keyword>
				<term>fell</term>
				<label>Fell</label>
			</keyword>
			<keyword>
				<term>produce</term>
				<label>Produce</label>
			</keyword>
			<keyword>
				<term>department of energy</term>
				<label>Department of Energy</label>
			</keyword>
			<keyword>
				<term>district</term>
				<label>District</label>
			</keyword>
			<keyword>
				<term>statute</term>
				<label>Statute</label>
			</keyword>
			<keyword>
				<term>policy</term>
				<label>Policy</label>
			</keyword>
			<keyword>
				<term>legislation</term>
				<label>Legislation</label>
			</keyword>
			<keyword>
				<term>council</term>
				<label>Council</label>
			</keyword>
			<keyword>
				<term>abandonment</term>
				<label>Abandonment</label>
			</keyword>
			<keyword>
				<term>update</term>
				<label>Update</label>
			</keyword>
			<keyword>
				<term>land purchase</term>
				<label>Land Purchase</label>
			</keyword>
			<keyword>
				<term>trim</term>
				<label>Trim</label>
			</keyword>
			<keyword>
				<term>drought</term>
				<label>Drought</label>
			</keyword>
			<keyword>
				<term>expansion</term>
				<label>Expansion</label>
			</keyword>
			<keyword>
				<term>water</term>
				<label>Water</label>
			</keyword>
			<keyword>
				<term>clean up</term>
				<label>Clean Up</label>
			</keyword>
			<keyword>
				<term>partition</term>
				<label>Partition</label>
			</keyword>
			<keyword>
				<term>knock down</term>
				<label>Knock Down</label>
			</keyword>
			<keyword>
				<term>downpour</term>
				<label>Downpour</label>
			</keyword>
			<keyword>
				<term>plot</term>
				<label>Plot</label>
			</keyword>
			<keyword>
				<term>patch</term>
				<label>Patch</label>
			</keyword>
			<keyword>
				<term>waterworks</term>
				<label>Waterworks</label>
			</keyword>
			<keyword>
				<term>barren</term>
				<label>Barren</label>
			</keyword>
			<keyword>
				<term>mow</term>
				<label>Mow</label>
			</keyword>
			<keyword>
				<term>unproductive</term>
				<label>Unproductive</label>
			</keyword>
			<keyword>
				<term>wind farm</term>
				<label>Wind Farm</label>
			</keyword>
			<keyword>
				<term>referendum</term>
				<label>Referendum</label>
			</keyword>
			<keyword>
				<term>stimulus</term>
				<label>Stimulus</label>
			</keyword>
			<keyword>
				<term>dry</term>
				<label>Dry</label>
			</keyword>
			<keyword>
				<term>burn</term>
				<label>Burn</label>
			</keyword>
			<keyword>
				<term>river</term>
				<label>River</label>
			</keyword>
			<keyword>
				<term>congressman</term>
				<label>Congressman</label>
			</keyword>
			<keyword>
				<term>pipes</term>
				<label>Pipes</label>
			</keyword>
			<keyword>
				<term>reduce</term>
				<label>Reduce</label>
			</keyword>
			<keyword>
				<term>temperature</term>
				<label>Temperature</label>
			</keyword>
			<keyword>
				<term>wind turbine</term>
				<label>Wind Turbine</label>
			</keyword>
			<keyword>
				<term>land sale</term>
				<label>Land Sale</label>
			</keyword>
			<keyword>
				<term>maintenance</term>
				<label>Maintenance</label>
			</keyword>
			<keyword>
				<term>bill</term>
				<label>Bill</label>
			</keyword>
			<keyword>
				<term>commission</term>
				<label>Commission</label>
			</keyword>
			<keyword>
				<term>aquatic</term>
				<label>Aquatic</label>
			</keyword>
			<keyword>
				<term>license</term>
				<label>License</label>
			</keyword>
			<keyword>
				<term>governor</term>
				<label>Governor</label>
			</keyword>
			<keyword>
				<term>deluge</term>
				<label>Deluge</label>
			</keyword>
			<keyword>
				<term>energy</term>
				<label>Energy</label>
			</keyword>
			<keyword>
				<term>bulldoze</term>
				<label>Bulldoze</label>
			</keyword>
			<keyword>
				<term>waterways</term>
				<label>Waterways</label>
			</keyword>
			<keyword>
				<term>develop</term>
				<label>Develop</label>
			</keyword>
			<keyword>
				<term>rain</term>
				<label>Rain</label>
			</keyword>
			<keyword>
				<term>hearing</term>
				<label>Hearing</label>
			</keyword>
			<keyword>
				<term>slash</term>
				<label>Slash</label>
			</keyword>
			<keyword>
				<term>vacant</term>
				<label>Vacant</label>
			</keyword>
			<keyword>
				<term>evolution</term>
				<label>Evolution</label>
			</keyword>
		</keyword_set>
		<keyword_set name="Urban and Transportation">
			<keyword>
				<term>townspeople</term>
				<label>Townspeople</label>
			</keyword>
			<keyword>
				<term>walk</term>
				<label>Walk</label>
			</keyword>
			<keyword>
				<term>metropolis</term>
				<label>Metropolis</label>
			</keyword>
			<keyword>
				<term>small town</term>
				<label>Small Town</label>
			</keyword>
			<keyword>
				<term>municipal</term>
				<label>Municipal</label>
			</keyword>
			<keyword>
				<term>building</term>
				<label>Building</label>
			</keyword>
			<keyword>
				<term>railroad</term>
				<label>Railroad</label>
			</keyword>
			<keyword>
				<term>rail</term>
				<label>Rail</label>
			</keyword>
			<keyword>
				<term>lodging</term>
				<label>Lodging</label>
			</keyword>
			<keyword>
				<term>transportation</term>
				<label>Transportation</label>
			</keyword>
			<keyword>
				<term>shipping</term>
				<label>Shipping</label>
			</keyword>
			<keyword>
				<term>route</term>
				<label>Route</label>
			</keyword>
			<keyword>
				<term>aviation</term>
				<label>Aviation</label>
			</keyword>
			<keyword>
				<term>highway</term>
				<label>Highway</label>
			</keyword>
			<keyword>
				<term>metro</term>
				<label>Metro</label>
			</keyword>
			<keyword>
				<term>commute</term>
				<label>Commute</label>
			</keyword>
			<keyword>
				<term>sprawl</term>
				<label>Sprawl</label>
			</keyword>
			<keyword>
				<term>movement</term>
				<label>Movement</label>
			</keyword>
			<keyword>
				<term>built up</term>
				<label>Built Up</label>
			</keyword>
			<keyword>
				<term>town</term>
				<label>Town</label>
			</keyword>
			<keyword>
				<term>road work</term>
				<label>Road Work</label>
			</keyword>
			<keyword>
				<term>population</term>
				<label>Population</label>
			</keyword>
			<keyword>
				<term>real estate</term>
				<label>Real Estate</label>
			</keyword>
			<keyword>
				<term>planner</term>
				<label>Planner</label>
			</keyword>
			<keyword>
				<term>civic</term>
				<label>Civic</label>
			</keyword>
			<keyword>
				<term>travel</term>
				<label>Travel</label>
			</keyword>
			<keyword>
				<term>street</term>
				<label>Street</label>
			</keyword>
			<keyword>
				<term>runway</term>
				<label>Runway</label>
			</keyword>
			<keyword>
				<term>housing</term>
				<label>Housing</label>
			</keyword>
			<keyword>
				<term>lot</term>
				<label>Lot</label>
			</keyword>
			<keyword>
				<term>mayor</term>
				<label>Mayor</label>
			</keyword>
			<keyword>
				<term>settlement</term>
				<label>Settlement</label>
			</keyword>
			<keyword>
				<term>village</term>
				<label>Village</label>
			</keyword>
			<keyword>
				<term>urban</term>
				<label>Urban</label>
			</keyword>
			<keyword>
				<term>passenger</term>
				<label>Passenger</label>
			</keyword>
			<keyword>
				<term>blight</term>
				<label>Blight</label>
			</keyword>
			<keyword>
				<term>traveler</term>
				<label>Traveler</label>
			</keyword>
			<keyword>
				<term>road</term>
				<label>Road</label>
			</keyword>
			<keyword>
				<term>congestion</term>
				<label>Congestion</label>
			</keyword>
			<keyword>
				<term>main road</term>
				<label>Main Road</label>
			</keyword>
			<keyword>
				<term>community</term>
				<label>Community</label>
			</keyword>
			<keyword>
				<term>underdeveloped</term>
				<label>Underdeveloped</label>
			</keyword>
			<keyword>
				<term>downtown</term>
				<label>Downtown</label>
			</keyword>
			<keyword>
				<term>construction</term>
				<label>Construction</label>
			</keyword>
			<keyword>
				<term>township</term>
				<label>Township</label>
			</keyword>
			<keyword>
				<term>transit</term>
				<label>Transit</label>
			</keyword>
			<keyword>
				<term>roadway</term>
				<label>Roadway</label>
			</keyword>
			<keyword>
				<term>commuter</term>
				<label>Commuter</label>
			</keyword>
			<keyword>
				<term>city</term>
				<label>City</label>
			</keyword>
			<keyword>
				<term>traffic</term>
				<label>Traffic</label>
			</keyword>
			<keyword>
				<term>walkway</term>
				<label>Walkway</label>
			</keyword>
			<keyword>
				<term>airport</term>
				<label>Airport</label>
			</keyword>
			<keyword>
				<term>airfield</term>
				<label>Airfield</label>
			</keyword>
			<keyword>
				<term>department of transportation</term>
				<label>Department of Transportation</label>
			</keyword>
		</keyword_set>
		<keyword_set name="Forestry and Grassland">
			<keyword>
				<term>logging</term>
				<label>Logging</label>
			</keyword>
			<keyword>
				<term>woodland</term>
				<label>Woodland</label>
			</keyword>
			<keyword>
				<term>forest</term>
				<label>Forest</label>
			</keyword>
			<keyword>
				<term>timber</term>
				<label>Timber</label>
			</keyword>
			<keyword>
				<term>field</term>
				<label>Field</label>
			</keyword>
			<keyword>
				<term>prairie</term>
				<label>Prairie</label>
			</keyword>
			<keyword>
				<term>great plains</term>
				<label>Great Plains</label>
			</keyword>
			<keyword>
				<term>wood</term>
				<label>Wood</label>
			</keyword>
			<keyword>
				<term>plain</term>
				<label>Plain</label>
			</keyword>
			<keyword>
				<term>grassland</term>
				<label>Grassland</label>
			</keyword>
			<keyword>
				<term>forestry</term>
				<label>Forestry</label>
			</keyword>
		</keyword_set>
	</keywords>
</cache>
