# Supplementary material
Source: MDPI journal article supplement (https://www.mdpi.com/2071-1050/2/5/1182)
Supplement: s1 [file s1 › Sustainability_Altaweel_EtAl/Client/Client.eml]

<?xml version="1.0" encoding="UTF-8"?>
<component inherit-compiler-output="false">
    <output url="file://$MODULE_DIR$/bin" />
    <exclude-output />
    <output-test url="file://$MODULE_DIR$/bin" />
    <testFolder url="file://$MODULE_DIR$/test" />
</component>
