# Supplementary material
Source: MDPI journal article supplement (https://www.mdpi.com/2071-1050/2/5/1182)
Supplement: s1 [file s1 › Sustainability_Altaweel_EtAl/Client/Client.iml]

<?xml version="1.0" encoding="UTF-8"?>
<module relativePaths="false" classpath="eclipse" type="JAVA_MODULE" version="4" />
