# Supplementary material
Source: MDPI journal article supplement (https://www.mdpi.com/2071-1050/2/5/1182)
Supplement: s1 [file s1 › Sustainability_Altaweel_EtAl/Client/docs/allclasses-frame.html]

All Classes


**All Classes**
  

|  |
| --- |
| AbstractAxis   AbstractCircleNodeStyler   AbstractDataFrameTableModel   AbstractDocumentsModel   AbstractDomainAxis   AbstractEdgeStyler   AbstractLayout2D   AbstractMarqueeHandler   AbstractMarqueeZoomer   *Accumulator*   AddDocSetDialog   *AIDA2DLayer*   AIDAClient   AIDAClientConfigurator   AIDAClientPlugin   AIDADatasetProducer   AIDADatasetProducer.AFDataFrame   AIDADatasetProducer.AFDataset   AIDADockableHelper   AIDAGui   *AIDAGuiConstants*   *AIDAVisualization*   AIDAVisualizationAdapter   AlertFileIO   AnimationConfigDialog   Animator   AnimatorPropertyBean   AppearanceFactory   AppearanceFactory.PolygonDraw   AppearenceFactory   AppStarter   ASTAdd   ASTAnd   ASTCount   ASTDiv   ASTE   ASTEqEqual   ASTGreaterEq   ASTGreaterThan   ASTLessEq   ASTLessThan   ASTMean   ASTMod   ASTMul   ASTNeg   ASTNotEqual   ASTNumber   ASTOr   ASTPI   ASTPow   ASTstart   ASTSubtract   ASTVar   ASTVarList   Axis   AxisHighlight   *BooleanOp*   BoundingSphere   Box   Bubble   Bubble.State   BubbleChart   BubbleChart.Category   BubbleChart.CategoryComparator   BubbleConfigBean   BubbleConfigBean.AxisType   *BubbleConstants*   BubbleData   *BubbleDataset*   BubbleDialog   BubbleDialog.SourceItem   BubbleExperiments   BubbleLayer   BubblePlot   *BubblePlot.Updater*   BubblePlotCreator   *BubbleRenderer*   *BubbleSelectionListener*   BubbleSlider   BubbleTooltip   Cache   *CacheDocumentSet*   CacheElement   CacheElement.AllDocs   CacheElement.DIIter   CacheElementNode   CacheFileReader   *CacheFileReader.XMLEventProcessor*   CacheNode   CachePanel   CachePanel.CacheRenderer   CachePropsPanel   CacheReaderTests   CacheTimeSeriesParams   CacheTreePanel   CacheTSPanel   Canvas2D   Canvas3D   Canvas3D   Canvas3D.Mode   Canvas3D.Mode   *CanvasListener*   *CGEdge*   CircleLayout   CircleLayout   ClientDocument   ClientUtils   *Cluster*   ClusterCentroidDragHandler   ClusterCentroidDragHandler.CentroidFilter   *Clusterer*   ClustererSVTest   ClusterPanel   *ClusterResults*   *Clusters*   ClustersBuilder   ClustersBuilder.DefClusters   ClusterTableModel   ColorMap   ColorMap.IntervalType   ColorMap.PaletteType   ColorMapLoader   ColorMapper   ColorMapTableModel   *Colors*   CompositeGeometry   ConceptClusterer   *ConceptGenerator*   *ConceptGeneratorProducer*   ConceptGraph   ConceptGraphBuilder   ConceptPanel   ConstantQuery   CreateTSWorker   Dashboard   DataFrameCategoryDataset   DataFrameCategoryDataset.DateColumnKey   DataTest   DatedDocumentId   *DateRangeChangedListener*   DateRangeColumnKey   DefaultAccumulator   DefaultBubbleDataset   DefaultBubbleDataset.CategoryEntry   DefaultBubbleRenderer   DefaultCGEdge   DefaultConceptGenerator   DefaultConceptGenerator.ScoredKeywordImpl   DefaultDocumentsModel   DefaultKeyword   DefaultNodeStyler   DefaultScoredKeyword   DFTimeSeriesParams   DocOpsCanvasListener   DocOpsWidget   DocSetID   DocSetNode   *DocSetOperation*   *DocSets*   DocsTabPanel   DocTests   *DocumentContainer*   *DocumentsModel*   DocumentsView   DocumentsView.CopyAction   DomainAxis   DragHandler   *EdgeCreator*   *EdgeCreatorCreator*   EdgeSelectionHandler   *EdgeStyler*   EdgeStyler   ElevatedTextLayer   Emailer   ERDataFeed   FeatureOverlay   FeaturePropertyFinder   FeatureSpatialMap   FormulaListElement   Frame   FrequencyCountQuery   FRLayout   GapMinderCSVReader   GapMinderCSVReader.Indicator   GapMinderCSVReader.Row   GapMinderCSVReader.Value   GeometryData   GIS3DDisplay   GIS3DTest   GIS3DUtils   GISDisplay   GisDisplayMediator2   GISPanelTest   GISTimeStepStyler   GraphOptionsPanel   GraphPlotRenderer   GraphRenderer   *GraphSwapable*   GrayScaleEdgeStyler   GreaterThan   GroupScatterPlot   GroupScatterPlot.LabelGenerator   H2CasCSVReader   *Imageable*   ImageableComponent   ImageExportAction   ImageExporter   ImageUtilities   InfoDragger   InfoDragger   InfoOverlay   InputHandler   ISOMLayout   ItemSelectionHandler   JJTParserState   *Keyword*   KeywordDocCountFilter   Keywords   KeywordsConceptGeneratorProducer   KeywordTableModel   KeywordTipper   KKLayout   LabeledShape   *Layout2D*   LegendAxis   LegendPanel   LensHandler   LessThan   *LocationChangedListener*   LogDomainAxis   LuceneSearcher   LuceneSearchTest   Map3DPlotCreator   Map3DPlotCreator.TimeStepListener   MapMenuMaker   MapPlotCreator   MapPlotCreator.TimeStepListener   MapToolTipper   MaterialAppearence   MouseRotate   MouseTranslate   MouseWheelZoom   MouseZoom   MTaskPaneGroup   MTaskPaneGroupUI   NetTests   NetworkDisplay   NetworkOutputter   NetworkPlotCreator   NetworkTimeSlider   NetworkTimeSlider2   NetworkVizCreator   *Node*   NodeDragSelectionHandler   NodeSelector   NodeSelector   *NodeStyler*   NodeStyler   NodeUtils   NodeUtils   NumericRange   OccurenceEdgeCC   OccurrenceEdgeCreator   OccurrenceFilterCreator   OpenCacheAction   OpenTriggerDialog   OptionsWidget   OptionsWidget.LayerEnableAction   Palette   PaletteCreator   PaletteIcon   PaletteIcon.Orientation   PaletteList   PalettePanel   PaletteSelectionPanel   ParseException   Parser   *ParserConstants*   ParserTokenManager   *ParserTreeConstants*   PathFilter   PGISCanvas   PGISLayer   PGISLayer.BoundsListener   PGISLayer.RenderEnum   PGISPanTool   PiccoloMapPanel   Plot3DTest   *PlotConstants*   PlotCreationException   PlotData   PlotModel   PlotRowKey   PlotType   PMarqueeZoomIn   PMarqueeZoomOut   PositionTool   *ProbeHandler*   ProgressLayer   *ProgressListener*   Project   ProjectReader   ProjectReaderTests   *Query*   QueryRunner   QueryTests   RangeAxis   *RangeChangedListener*   RangeChangeEvent   RangeEvent   RangeSlider   RangeSliderUI   Ray3f   RayCreator   RotatedSlider   ScaledNodeStyler   ScatterDialog   ScatterGroupDataset   ScatterGroupDataset.SeriesData   ScatterPlotTest   *ScoredKeyword*   ScorerThresholdEdgeCreator   SectorCreator   SelectionHandler   *SelectionListener*   *SelectionListener*   SelectionManager   SelectionManager   SelectionManager.Iter   SelectionManager.Iter   ShapeFactory   ShapefileSimplifier   ShapeIcon   ShowDocViewOp   SimilarityCluster   SimilarityClusterDisplay   SimilarityClusterLayout   SimilarityClusterLayout.Points   SimilarityClusterLayout.PointScore   SimilarityFilterCreator   SimpleCharStream   SimpleNode   SimplifierTest   Slice   SpringLayout   SquareIcon   *StackDrawable*   StackDrawable2   StackItem   StackItem2   StackItemDateFormatter   *StackItemTextFormatter*   StackKeyHandler   StackRenderer   StackRenderer2   StackSorter   StackSorter.Asc   StackSorter.Desc   StackSorter.SortOrder   StackTester   StreamingRenderer   StringNumberComparator   StructuredDataPanel   StructuredDataPanel.FeedRenderer   StructuredDataPanel.VariableRenderer   *Styler*   SubsetDocumentsModel   SVConceptGenerator   SVConceptGeneratorProducer   SVEdgeCC   TableCreator   TableCreator.DateRenderer   TableTest   TCategoryDataFrameTableModel   TempCacheDocSet   TermNode   Test   Test3D   TextureDrawable   TFEdgeCC   TFFilterCreator   TFIDFEdgeCC   TFIDFFilterCreator   TickLocator   TimeSeriesMinMax   *TimeSeriesParameters*   TimeSeriesPlot   TimeSeriesPlotWidget   TimeSeriesTableModel   TimeSeriesTableModel   TimeSeriesTest   TimeSliceSlider   TimeSliceSlider2   TimeSliderInitializer   TimeSliderTest   TimeStepWidget   Token   TokenMgrError   ToolManager   ToolTipper   Trigger   TriggerDialog   TriggerOp   TriggerPanel   TriggerPanel.TriggerNameRenderer   TriggerResult   TriggerRunnerWorker   *TriggerUpdateListener*   TSConceptGraphs   *TSFilterCreator*   TSGraphCanvasListener   TSGraphPlotCanvasListener   TSGraphPlotCanvasListener.ItemFormatter   TSGraphVNode   TVDataFrameTableModel   Utils3D   Utils3D.Location   ValueGraphCreator   ValueNode   VGeometry   Viz3DTests   VizDialog   VizPropertyBean   VizPropertyBean.Type   VLabel   VLine   VNode   VShapeFactory   VShapeTF   VShapeTS   VSpatial   WekaTester   WIDataFeed   WIHealthEmployeeFeed   WIPCRFeed   WrappedDocSet   WrappedDocumentsModel   Zoomer |
