# Supplementary material
Source: MDPI journal article supplement (https://www.mdpi.com/2071-1050/2/5/1182)
Supplement: s1 [file s1 › Sustainability_Altaweel_EtAl/Client/docs/anl/aida/AIDADatasetProducer.AFDataFrame.html]

AIDADatasetProducer.AFDataFrame


---


|  |  |  |  |  |  |  |  |  |  |  |
| --- | --- | --- | --- | --- | --- | --- | --- | --- | --- | --- |
| |  |  |  |  |  |  |  |  | | --- | --- | --- | --- | --- | --- | --- | --- | | **Overview** | **Package** | **Class** | **Use** | **Tree** | **Deprecated** | **Index** | **Help** | | |  |
| **PREV CLASS**   **NEXT CLASS** | **FRAMES**    **NO FRAMES**     **All Classes** |
| SUMMARY: NESTED | FIELD | CONSTR | METHOD | DETAIL: FIELD | CONSTR | METHOD |


---


## anl.aida Class AIDADatasetProducer.AFDataFrame

```
java.lang.Object
  anl.aida.data.AbstractDataFrame
      anl.aida.AIDADatasetProducer.AFDataFrame
```

**All Implemented Interfaces:**: anl.aida.data.DataFrame

**Enclosing class:**: AIDADatasetProducer

---

``` private static class AIDADatasetProducer.AFDataFrame extends anl.aida.data.AbstractDataFrame ```

---

| **Field Summary** | |
| --- | --- |
| `private  int` | `dataCount` |
| `private  java.io.File` | `file` |
| `private  long` | `offset` |

| **Fields inherited from class anl.aida.data.AbstractDataFrame** |
| --- |
| `array, axes, datasets, max, min, variable` |


| **Constructor Summary** | |
| --- | --- |
| `AIDADatasetProducer.AFDataFrame(anl.aida.data.Variable var, anl.aida.data.Dataset data, anl.aida.data.Axes<anl.aida.data.DataFrameAxis> axes)` |


| **Method Summary** | |
| --- | --- |
| `ucar.ma2.Array` | `getArray()` |
| `java.lang.Class<?>` | `getArrayType()` |
| `double` | `getDouble(anl.aida.data.DataFrameIndex index)` |
| `float` | `getFloat(anl.aida.data.DataFrameIndex index)` |
| `anl.aida.data.DataFrameIndex` | `getIndex()` |
| `int` | `getInt(anl.aida.data.DataFrameIndex index)` |
| `long` | `getLong(anl.aida.data.DataFrameIndex index)` |
| `int[]` | `getShape()` |
| `long` | `getSize()` |
| `private  void` | `init()` |
| `private  int` | `interpolate(ucar.ma2.ArrayFloat.D2 farray, int category, int start)` |
| `private  int` | `skipToFirstGoodValue(ucar.ma2.ArrayFloat.D2 farray, int category)` |
| `anl.aida.data.DataFrame` | `slice(anl.aida.data.Slice slice)` |

| **Methods inherited from class anl.aida.data.AbstractDataFrame** |
| --- |
| `getAxes, getDataset, getVariable` |

| **Methods inherited from class java.lang.Object** |
| --- |
| `clone, equals, finalize, getClass, hashCode, notify, notifyAll, toString, wait, wait, wait` |

| **Field Detail** |
| --- |

### file

```
private java.io.File file
```

---


### dataCount

```
private int dataCount
```

---


### offset

```
private long offset
```


| **Constructor Detail** |
| --- |

### AIDADatasetProducer.AFDataFrame

```
public AIDADatasetProducer.AFDataFrame(anl.aida.data.Variable var,
                                       anl.aida.data.Dataset data,
                                       anl.aida.data.Axes<anl.aida.data.DataFrameAxis> axes)
```


| **Method Detail** |
| --- |

### init

```
private void init()
```

---


### interpolate

```
private int interpolate(ucar.ma2.ArrayFloat.D2 farray,
                        int category,
                        int start)
```

---


### skipToFirstGoodValue

```
private int skipToFirstGoodValue(ucar.ma2.ArrayFloat.D2 farray,
                                 int category)
```

---


### getArray

```
public ucar.ma2.Array getArray()
```

:   **Specified by:**: `getArray` in interface `anl.aida.data.DataFrame` **Overrides:**: `getArray` in class `anl.aida.data.AbstractDataFrame`

---


### getArrayType

```
public java.lang.Class<?> getArrayType()
```

:   **Specified by:**: `getArrayType` in interface `anl.aida.data.DataFrame` **Overrides:**: `getArrayType` in class `anl.aida.data.AbstractDataFrame`

---


### getDouble

```
public double getDouble(anl.aida.data.DataFrameIndex index)
```

:   **Specified by:**: `getDouble` in interface `anl.aida.data.DataFrame` **Overrides:**: `getDouble` in class `anl.aida.data.AbstractDataFrame`

---


### getFloat

```
public float getFloat(anl.aida.data.DataFrameIndex index)
```

:   **Specified by:**: `getFloat` in interface `anl.aida.data.DataFrame` **Overrides:**: `getFloat` in class `anl.aida.data.AbstractDataFrame`

---


### getIndex

```
public anl.aida.data.DataFrameIndex getIndex()
```

:   **Specified by:**: `getIndex` in interface `anl.aida.data.DataFrame` **Overrides:**: `getIndex` in class `anl.aida.data.AbstractDataFrame`

---


### getInt

```
public int getInt(anl.aida.data.DataFrameIndex index)
```

:   **Specified by:**: `getInt` in interface `anl.aida.data.DataFrame` **Overrides:**: `getInt` in class `anl.aida.data.AbstractDataFrame`

---


### getLong

```
public long getLong(anl.aida.data.DataFrameIndex index)
```

:   **Specified by:**: `getLong` in interface `anl.aida.data.DataFrame` **Overrides:**: `getLong` in class `anl.aida.data.AbstractDataFrame`

---


### getShape

```
public int[] getShape()
```

:   **Specified by:**: `getShape` in interface `anl.aida.data.DataFrame` **Overrides:**: `getShape` in class `anl.aida.data.AbstractDataFrame`

---


### getSize

```
public long getSize()
```

:   **Specified by:**: `getSize` in interface `anl.aida.data.DataFrame` **Overrides:**: `getSize` in class `anl.aida.data.AbstractDataFrame`

---


### slice

```
public anl.aida.data.DataFrame slice(anl.aida.data.Slice slice)
                              throws ucar.ma2.InvalidRangeException
```

:   **Specified by:**: `slice` in interface `anl.aida.data.DataFrame` **Overrides:**: `slice` in class `anl.aida.data.AbstractDataFrame`
:   **Throws:**: `ucar.ma2.InvalidRangeException`


---


|  |  |  |  |  |  |  |  |  |  |  |
| --- | --- | --- | --- | --- | --- | --- | --- | --- | --- | --- |
| |  |  |  |  |  |  |  |  | | --- | --- | --- | --- | --- | --- | --- | --- | | **Overview** | **Package** | **Class** | **Use** | **Tree** | **Deprecated** | **Index** | **Help** | | |  |
| **PREV CLASS**   **NEXT CLASS** | **FRAMES**    **NO FRAMES**     **All Classes** |
| SUMMARY: NESTED | FIELD | CONSTR | METHOD | DETAIL: FIELD | CONSTR | METHOD |


---
