# Supplementary material
Source: MDPI journal article supplement (https://www.mdpi.com/2071-1050/2/5/1182)
Supplement: s1 [file s1 › Sustainability_Altaweel_EtAl/Client/docs/anl/aida/AIDADatasetProducer.AFDataset.html]

AIDADatasetProducer.AFDataset


---


|  |  |  |  |  |  |  |  |  |  |  |
| --- | --- | --- | --- | --- | --- | --- | --- | --- | --- | --- |
| |  |  |  |  |  |  |  |  | | --- | --- | --- | --- | --- | --- | --- | --- | | **Overview** | **Package** | **Class** | **Use** | **Tree** | **Deprecated** | **Index** | **Help** | | |  |
| **PREV CLASS**   NEXT CLASS | **FRAMES**    **NO FRAMES**     **All Classes** |
| SUMMARY: NESTED | FIELD | CONSTR | METHOD | DETAIL: FIELD | CONSTR | METHOD |


---


## anl.aida Class AIDADatasetProducer.AFDataset

```
java.lang.Object
  anl.aida.data.AbstractDataset
      anl.aida.AIDADatasetProducer.AFDataset
```

**All Implemented Interfaces:**: anl.aida.data.Dataset

**Enclosing class:**: AIDADatasetProducer

---

``` private static class AIDADatasetProducer.AFDataset extends anl.aida.data.AbstractDataset ```

---

| **Field Summary** | |
| --- | --- |
| `private  java.lang.String` | `name` |

| **Fields inherited from class anl.aida.data.AbstractDataset** |
| --- |
| `alias, frames, varsByName` |


| **Constructor Summary** | |
| --- | --- |
| `AIDADatasetProducer.AFDataset(java.lang.String name)` |


| **Method Summary** | |
| --- | --- |
| `private  void` | `addDataFrame(anl.aida.data.DataFrame frame)` |
| `private  void` | `addVar(anl.aida.data.Variable var)` |
| `java.lang.String` | `getName()` |

| **Methods inherited from class anl.aida.data.AbstractDataset** |
| --- |
| `addVariable, getAlias, getAxes, getDataFrame, getVariable, getVariables, setAlias` |

| **Methods inherited from class java.lang.Object** |
| --- |
| `clone, equals, finalize, getClass, hashCode, notify, notifyAll, toString, wait, wait, wait` |

| **Field Detail** |
| --- |

### name

```
private java.lang.String name
```


| **Constructor Detail** |
| --- |

### AIDADatasetProducer.AFDataset

```
AIDADatasetProducer.AFDataset(java.lang.String name)
```


| **Method Detail** |
| --- |

### addVar

```
private void addVar(anl.aida.data.Variable var)
```

---


### addDataFrame

```
private void addDataFrame(anl.aida.data.DataFrame frame)
```

---


### getName

```
public java.lang.String getName()
```


---


|  |  |  |  |  |  |  |  |  |  |  |
| --- | --- | --- | --- | --- | --- | --- | --- | --- | --- | --- |
| |  |  |  |  |  |  |  |  | | --- | --- | --- | --- | --- | --- | --- | --- | | **Overview** | **Package** | **Class** | **Use** | **Tree** | **Deprecated** | **Index** | **Help** | | |  |
| **PREV CLASS**   NEXT CLASS | **FRAMES**    **NO FRAMES**     **All Classes** |
| SUMMARY: NESTED | FIELD | CONSTR | METHOD | DETAIL: FIELD | CONSTR | METHOD |


---
