# Supplementary material
Source: MDPI journal article supplement (https://www.mdpi.com/2071-1050/2/5/1182)
Supplement: s1 [file s1 › Sustainability_Altaweel_EtAl/Client/docs/anl/aida/AIDADatasetProducer.html]

AIDADatasetProducer


---


|  |  |  |  |  |  |  |  |  |  |  |
| --- | --- | --- | --- | --- | --- | --- | --- | --- | --- | --- |
| |  |  |  |  |  |  |  |  | | --- | --- | --- | --- | --- | --- | --- | --- | | **Overview** | **Package** | **Class** | **Use** | **Tree** | **Deprecated** | **Index** | **Help** | | |  |
| PREV CLASS   **NEXT CLASS** | **FRAMES**    **NO FRAMES**     **All Classes** |
| SUMMARY: NESTED | FIELD | CONSTR | METHOD | DETAIL: FIELD | CONSTR | METHOD |


---


## anl.aida Class AIDADatasetProducer

```
java.lang.Object
  anl.aida.AIDADatasetProducer
```

---

``` public class AIDADatasetProducer extends java.lang.Object ```

Creates a Dataset from an "AIDA Format" data file.

---

| **Nested Class Summary** | |
| --- | --- |
| `private static class` | `AIDADatasetProducer.AFDataFrame` |
| `private static class` | `AIDADatasetProducer.AFDataset` |


| **Field Summary** | |
| --- | --- |
| `private  java.lang.String` | `catAxisDescription` |
| `private  anl.aida.data.AxisType` | `catAxisType` |
| `private  javax.measure.unit.Unit<?>` | `timeAxisUnit` |


| **Constructor Summary** | |
| --- | --- |
| `AIDADatasetProducer(anl.aida.data.AxisType catAxisType, java.lang.String catAxisDescription, javax.measure.unit.Unit<?> timeAxisUnit)` |


| **Method Summary** | |
| --- | --- |
| `anl.aida.data.Dataset` | `createDataset(java.lang.String file, java.lang.String name)` |

| **Methods inherited from class java.lang.Object** |
| --- |
| `clone, equals, finalize, getClass, hashCode, notify, notifyAll, toString, wait, wait, wait` |

| **Field Detail** |
| --- |

### catAxisType

```
private anl.aida.data.AxisType catAxisType
```

---


### catAxisDescription

```
private java.lang.String catAxisDescription
```

---


### timeAxisUnit

```
private javax.measure.unit.Unit<?> timeAxisUnit
```


| **Constructor Detail** |
| --- |

### AIDADatasetProducer

```
public AIDADatasetProducer(anl.aida.data.AxisType catAxisType,
                           java.lang.String catAxisDescription,
                           javax.measure.unit.Unit<?> timeAxisUnit)
```

**Parameters:**: `catAxisType` -: `catAxisDescription` -: `timeAxisUnit` -


| **Method Detail** |
| --- |

### createDataset

```
public anl.aida.data.Dataset createDataset(java.lang.String file,
                                           java.lang.String name)
                                    throws java.io.IOException
```

:   **Throws:**: `java.io.IOException`


---


|  |  |  |  |  |  |  |  |  |  |  |
| --- | --- | --- | --- | --- | --- | --- | --- | --- | --- | --- |
| |  |  |  |  |  |  |  |  | | --- | --- | --- | --- | --- | --- | --- | --- | | **Overview** | **Package** | **Class** | **Use** | **Tree** | **Deprecated** | **Index** | **Help** | | |  |
| PREV CLASS   **NEXT CLASS** | **FRAMES**    **NO FRAMES**     **All Classes** |
| SUMMARY: NESTED | FIELD | CONSTR | METHOD | DETAIL: FIELD | CONSTR | METHOD |


---
