# Supplementary material
Source: MDPI journal article supplement (https://www.mdpi.com/2071-1050/2/5/1182)
Supplement: s1 [file s1 › Sustainability_Altaweel_EtAl/Client/docs/anl/aida/algo/class-use/Cluster.html]

Uses of Interface anl.aida.algo.Cluster


---


|  |  |  |  |  |  |  |  |  |  |  |
| --- | --- | --- | --- | --- | --- | --- | --- | --- | --- | --- |
| |  |  |  |  |  |  |  |  | | --- | --- | --- | --- | --- | --- | --- | --- | | **Overview** | **Package** | **Class** | **Use** | **Tree** | **Deprecated** | **Index** | **Help** | | |  |
| PREV   NEXT | **FRAMES**    **NO FRAMES**     **All Classes** |


---


## **Uses of Interface anl.aida.algo.Cluster**

| Packages that use Cluster | |
| --- | --- |
| **anl.aida.algo** |  |

| Uses of Cluster in anl.aida.algo | |
| --- | --- |

| Classes in anl.aida.algo that implement Cluster | |
| --- | --- |
| `class` | `SimilarityCluster<T>`             Encapsulates a centroid vector and a collection of items of type T and their similarity (0 to 1) with that centroid vector. |

| Methods in anl.aida.algo that return Cluster | |
| --- | --- |
| `Cluster<T>` | `ClustersBuilder.DefClusters.getCluster(int index)`             Gets the cluster at the specified index. |
| `Cluster<T>` | `Clusters.getCluster(int index)`             Gets the cluster at the specified index. |

| Methods in anl.aida.algo that return types with arguments of type Cluster | |
| --- | --- |
| `java.lang.Iterable<? extends Cluster<T>>` | `ClustersBuilder.DefClusters.clusters()`             Gets an iterable over all the Clusters contained by this collection. |
| `java.lang.Iterable<? extends Cluster<T>>` | `Clusters.clusters()`             Gets an iterable over all the Clusters contained by this collection. |
| `java.lang.Iterable<? extends Cluster>` | `ClusterResults.clusters()` |

---


|  |  |  |  |  |  |  |  |  |  |  |
| --- | --- | --- | --- | --- | --- | --- | --- | --- | --- | --- |
| |  |  |  |  |  |  |  |  | | --- | --- | --- | --- | --- | --- | --- | --- | | **Overview** | **Package** | **Class** | **Use** | **Tree** | **Deprecated** | **Index** | **Help** | | |  |
| PREV   NEXT | **FRAMES**    **NO FRAMES**     **All Classes** |


---
