# Supplementary material
Source: MDPI journal article supplement (https://www.mdpi.com/2071-1050/2/5/1182)
Supplement: s1 [file s1 › Sustainability_Altaweel_EtAl/Client/docs/anl/aida/algo/class-use/Clusterer.html]

Uses of Interface anl.aida.algo.Clusterer


---


|  |  |  |  |  |  |  |  |  |  |  |
| --- | --- | --- | --- | --- | --- | --- | --- | --- | --- | --- |
| |  |  |  |  |  |  |  |  | | --- | --- | --- | --- | --- | --- | --- | --- | | **Overview** | **Package** | **Class** | **Use** | **Tree** | **Deprecated** | **Index** | **Help** | | |  |
| PREV   NEXT | **FRAMES**    **NO FRAMES**     **All Classes** |


---


## **Uses of Interface anl.aida.algo.Clusterer**

| Packages that use Clusterer | |
| --- | --- |
| **anl.aida.client** |  |
| **anl.aida.client.gui** |  |

| Uses of Clusterer in anl.aida.client | |
| --- | --- |

| Fields in anl.aida.client declared as Clusterer | |
| --- | --- |
| `private  Clusterer<anl.aida.core.DocumentID>` | `CacheElement.AllDocs.clusterer` |

| Methods in anl.aida.client that return Clusterer | |
| --- | --- |
| `Clusterer<anl.aida.core.DocumentID>` | `WrappedDocSet.getClusterer()`             Gets the Clusterer that should be used to Cluster this document set. |
| `Clusterer<anl.aida.core.DocumentID>` | `CacheDocumentSet.getClusterer()`             Gets the Clusterer that should be used to Cluster this document set. |
| `Clusterer<anl.aida.core.DocumentID>` | `TempCacheDocSet.getClusterer()`             Gets the Clusterer that should be used to Cluster this document set. |
| `Clusterer<anl.aida.core.DocumentID>` | `CacheElement.AllDocs.getClusterer()`             Gets the Clusterer that should be used to Cluster this document set. |

| Uses of Clusterer in anl.aida.client.gui | |
| --- | --- |

| Fields in anl.aida.client.gui declared as Clusterer | |
| --- | --- |
| `private  Clusterer<anl.aida.core.DocumentID>` | `ClusterPanel.clusterer` |

---


|  |  |  |  |  |  |  |  |  |  |  |
| --- | --- | --- | --- | --- | --- | --- | --- | --- | --- | --- |
| |  |  |  |  |  |  |  |  | | --- | --- | --- | --- | --- | --- | --- | --- | | **Overview** | **Package** | **Class** | **Use** | **Tree** | **Deprecated** | **Index** | **Help** | | |  |
| PREV   NEXT | **FRAMES**    **NO FRAMES**     **All Classes** |


---
