# Supplementary material
Source: MDPI journal article supplement (https://www.mdpi.com/2071-1050/2/5/1182)
Supplement: s1 [file s1 › Sustainability_Altaweel_EtAl/Client/docs/anl/aida/algo/class-use/Clusters.html]

Uses of Interface anl.aida.algo.Clusters


---


|  |  |  |  |  |  |  |  |  |  |  |
| --- | --- | --- | --- | --- | --- | --- | --- | --- | --- | --- |
| |  |  |  |  |  |  |  |  | | --- | --- | --- | --- | --- | --- | --- | --- | | **Overview** | **Package** | **Class** | **Use** | **Tree** | **Deprecated** | **Index** | **Help** | | |  |
| PREV   NEXT | **FRAMES**    **NO FRAMES**     **All Classes** |


---


## **Uses of Interface anl.aida.algo.Clusters**

| Packages that use Clusters | |
| --- | --- |
| **anl.aida.algo** |  |
| **anl.aida.client.gui** |  |
| **anl.aida.viz** |  |

| Uses of Clusters in anl.aida.algo | |
| --- | --- |

| Classes in anl.aida.algo that implement Clusters | |
| --- | --- |
| `private static class` | `ClustersBuilder.DefClusters<T>` |

| Methods in anl.aida.algo that return Clusters | |
| --- | --- |
| `Clusters<T>` | `ClustersBuilder.buildClusters()`             Builds a Clusters instance out of the data that has been added between any calls to buildCluster. |
| `Clusters<T>` | `Clusterer.cluster(int numClusters)`             Calculate the specified number of clusters and return the results. |
| `Clusters<anl.aida.core.DocumentID>` | `ConceptClusterer.generateClusters(java.util.List<java.lang.String> concepts)` |

| Uses of Clusters in anl.aida.client.gui | |
| --- | --- |

| Fields in anl.aida.client.gui declared as Clusters | |
| --- | --- |
| `private  Clusters<anl.aida.core.DocumentID>` | `ClusterTableModel.clusters` |

| Methods in anl.aida.client.gui that return Clusters | |
| --- | --- |
| `protected  Clusters<anl.aida.core.DocumentID>` | `ClusterPanel.ClusterWorker.doInBackground()` |
| `Clusters<anl.aida.core.DocumentID>` | `ClusterTableModel.getClusters()` |

| Methods in anl.aida.client.gui with parameters of type Clusters | |
| --- | --- |
| `void` | `AIDAGui.addClusterDisplay(DocSetID id, Clusters<anl.aida.core.DocumentID> clusters, java.lang.String title)`             Adds a cluster display to the gui. |
| `void` | `ClusterTableModel.reset(Clusters<anl.aida.core.DocumentID> clusters)` |

| Uses of Clusters in anl.aida.viz | |
| --- | --- |

| Fields in anl.aida.viz declared as Clusters | |
| --- | --- |
| `private  Clusters<T>` | `SimilarityClusterLayout.clusters` |
| `private  Clusters<T>` | `SimilarityClusterDisplay.clusters` |

| Constructors in anl.aida.viz with parameters of type Clusters | |
| --- | --- |
| `SimilarityClusterDisplay(Clusters<T> clusters, java.awt.Dimension size)` |
| `SimilarityClusterLayout(Clusters<T> clusters, java.awt.Dimension size)` |

---


|  |  |  |  |  |  |  |  |  |  |  |
| --- | --- | --- | --- | --- | --- | --- | --- | --- | --- | --- |
| |  |  |  |  |  |  |  |  | | --- | --- | --- | --- | --- | --- | --- | --- | | **Overview** | **Package** | **Class** | **Use** | **Tree** | **Deprecated** | **Index** | **Help** | | |  |
| PREV   NEXT | **FRAMES**    **NO FRAMES**     **All Classes** |


---
