# Supplementary material
Source: MDPI journal article supplement (https://www.mdpi.com/2071-1050/2/5/1182)
Supplement: s1 [file s1 › Sustainability_Altaweel_EtAl/Client/docs/anl/aida/algo/class-use/ConceptGenerator.html]

Uses of Interface anl.aida.algo.ConceptGenerator


---


|  |  |  |  |  |  |  |  |  |  |  |
| --- | --- | --- | --- | --- | --- | --- | --- | --- | --- | --- |
| |  |  |  |  |  |  |  |  | | --- | --- | --- | --- | --- | --- | --- | --- | | **Overview** | **Package** | **Class** | **Use** | **Tree** | **Deprecated** | **Index** | **Help** | | |  |
| PREV   NEXT | **FRAMES**    **NO FRAMES**     **All Classes** |


---


## **Uses of Interface anl.aida.algo.ConceptGenerator**

| Packages that use ConceptGenerator | |
| --- | --- |
| **anl.aida.algo** |  |

| Uses of ConceptGenerator in anl.aida.algo | |
| --- | --- |

| Classes in anl.aida.algo that implement ConceptGenerator | |
| --- | --- |
| `class` | `DefaultConceptGenerator`             Generates scored concepts from a predetermined list of concepts. |
| `class` | `SVConceptGenerator`             Generates concepts based on Semantic Vector scores. |

| Methods in anl.aida.algo that return ConceptGenerator | |
| --- | --- |
| `ConceptGenerator` | `SVConceptGeneratorProducer.createGenerator(CacheElement element)` |
| `ConceptGenerator` | `KeywordsConceptGeneratorProducer.createGenerator(CacheElement element)` |
| `ConceptGenerator` | `ConceptGeneratorProducer.createGenerator(CacheElement element)`             Creates a concept generator, optionally using the cache element. |

---


|  |  |  |  |  |  |  |  |  |  |  |
| --- | --- | --- | --- | --- | --- | --- | --- | --- | --- | --- |
| |  |  |  |  |  |  |  |  | | --- | --- | --- | --- | --- | --- | --- | --- | | **Overview** | **Package** | **Class** | **Use** | **Tree** | **Deprecated** | **Index** | **Help** | | |  |
| PREV   NEXT | **FRAMES**    **NO FRAMES**     **All Classes** |


---
