# Supplementary material
Source: MDPI journal article supplement (https://www.mdpi.com/2071-1050/2/5/1182)
Supplement: s1 [file s1 › Sustainability_Altaweel_EtAl/Client/docs/anl/aida/algo/class-use/ScoredKeyword.html]

Uses of Interface anl.aida.algo.ScoredKeyword


---


|  |  |  |  |  |  |  |  |  |  |  |
| --- | --- | --- | --- | --- | --- | --- | --- | --- | --- | --- |
| |  |  |  |  |  |  |  |  | | --- | --- | --- | --- | --- | --- | --- | --- | | **Overview** | **Package** | **Class** | **Use** | **Tree** | **Deprecated** | **Index** | **Help** | | |  |
| PREV   NEXT | **FRAMES**    **NO FRAMES**     **All Classes** |


---


## **Uses of Interface anl.aida.algo.ScoredKeyword**

| Packages that use ScoredKeyword | |
| --- | --- |
| **anl.aida.algo** |  |
| **anl.aida.client.gui** |  |

| Uses of ScoredKeyword in anl.aida.algo | |
| --- | --- |

| Classes in anl.aida.algo that implement ScoredKeyword | |
| --- | --- |
| `private static class` | `DefaultConceptGenerator.ScoredKeywordImpl` |
| `class` | `DefaultScoredKeyword`             Default implementation of Concept |

| Methods in anl.aida.algo that return types with arguments of type ScoredKeyword | |
| --- | --- |
| `java.lang.Iterable<ScoredKeyword>` | `SVConceptGenerator.generateConcepts(int count)` |
| `java.lang.Iterable<ScoredKeyword>` | `DefaultConceptGenerator.generateConcepts(int count)` |
| `java.lang.Iterable<ScoredKeyword>` | `ConceptGenerator.generateConcepts(int count)`             Generate the specified number of concepts. |

| Uses of ScoredKeyword in anl.aida.client.gui | |
| --- | --- |

| Fields in anl.aida.client.gui declared as ScoredKeyword | |
| --- | --- |
| `private  ScoredKeyword` | `KeywordTableModel.Item.concept` |

| Fields in anl.aida.client.gui with type parameters of type ScoredKeyword | |
| --- | --- |
| `private  java.util.Set<ScoredKeyword>` | `KeywordTableModel.selectedTerms` |

| Methods in anl.aida.client.gui that return types with arguments of type ScoredKeyword | |
| --- | --- |
| `protected  java.lang.Iterable<ScoredKeyword>` | `ConceptPanel.ClusterWorker.doInBackground()` |
| `java.util.List<ScoredKeyword>` | `KeywordTableModel.getSelectedTerms()` |

| Methods in anl.aida.client.gui with parameters of type ScoredKeyword | |
| --- | --- |
| `void` | `KeywordTableModel.addItem(ScoredKeyword term)` |

| Constructors in anl.aida.client.gui with parameters of type ScoredKeyword | |
| --- | --- |
| `KeywordTableModel.Item(ScoredKeyword term)` |

---


|  |  |  |  |  |  |  |  |  |  |  |
| --- | --- | --- | --- | --- | --- | --- | --- | --- | --- | --- |
| |  |  |  |  |  |  |  |  | | --- | --- | --- | --- | --- | --- | --- | --- | | **Overview** | **Package** | **Class** | **Use** | **Tree** | **Deprecated** | **Index** | **Help** | | |  |
| PREV   NEXT | **FRAMES**    **NO FRAMES**     **All Classes** |


---
