# Supplementary material
Source: MDPI journal article supplement (https://www.mdpi.com/2071-1050/2/5/1182)
Supplement: s1 [file s1 › Sustainability_Altaweel_EtAl/Client/docs/anl/aida/algo/class-use/SimilarityCluster.html]

Uses of Class anl.aida.algo.SimilarityCluster


---


|  |  |  |  |  |  |  |  |  |  |  |
| --- | --- | --- | --- | --- | --- | --- | --- | --- | --- | --- |
| |  |  |  |  |  |  |  |  | | --- | --- | --- | --- | --- | --- | --- | --- | | **Overview** | **Package** | **Class** | **Use** | **Tree** | **Deprecated** | **Index** | **Help** | | |  |
| PREV   NEXT | **FRAMES**    **NO FRAMES**     **All Classes** |


---


## **Uses of Class anl.aida.algo.SimilarityCluster**

| Packages that use SimilarityCluster | |
| --- | --- |
| **anl.aida.algo** |  |

| Uses of SimilarityCluster in anl.aida.algo | |
| --- | --- |

| Fields in anl.aida.algo with type parameters of type SimilarityCluster | |
| --- | --- |
| `private  java.util.List<SimilarityCluster<T>>` | `ClustersBuilder.clusters` |
| `private  java.util.List<SimilarityCluster<T>>` | `ClustersBuilder.DefClusters.clusters` |

---


|  |  |  |  |  |  |  |  |  |  |  |
| --- | --- | --- | --- | --- | --- | --- | --- | --- | --- | --- |
| |  |  |  |  |  |  |  |  | | --- | --- | --- | --- | --- | --- | --- | --- | | **Overview** | **Package** | **Class** | **Use** | **Tree** | **Deprecated** | **Index** | **Help** | | |  |
| PREV   NEXT | **FRAMES**    **NO FRAMES**     **All Classes** |


---
