# Supplementary material
Source: MDPI journal article supplement (https://www.mdpi.com/2071-1050/2/5/1182)
Supplement: s1 [file s1 › Sustainability_Altaweel_EtAl/Client/docs/anl/aida/algo/Cluster.html]

Cluster


---


|  |  |  |  |  |  |  |  |  |  |  |
| --- | --- | --- | --- | --- | --- | --- | --- | --- | --- | --- |
| |  |  |  |  |  |  |  |  | | --- | --- | --- | --- | --- | --- | --- | --- | | **Overview** | **Package** | **Class** | **Use** | **Tree** | **Deprecated** | **Index** | **Help** | | |  |
| PREV CLASS   **NEXT CLASS** | **FRAMES**    **NO FRAMES**     **All Classes** |
| SUMMARY: NESTED | FIELD | CONSTR | METHOD | DETAIL: FIELD | CONSTR | METHOD |


---


## anl.aida.algo Interface Cluster<T>

**All Known Implementing Classes:**: SimilarityCluster

---

``` public interface Cluster<T> ```

Interface for a Cluster as produced from a Clustering algorithm.
The cluster should contain items of type T.

---

| **Method Summary** | |
| --- | --- |
| `float[]` | `getCentroid()`             Gets the vector for the cluster centroid. |
| `java.lang.String` | `getCentroidLabel()`             Gets the label for this cluster. |
| `int` | `getItemCount()`             The number of items in this cluster. |
| `float` | `getSimilarity(T item)`             Gets the similarity score of the specified item with the centroid of this cluster. |
| `java.lang.Iterable<anl.aida.util.ObjScore<T>>` | `items()`             Gets an iterable over all the items and score in this cluster. |

| **Method Detail** |
| --- |

### getCentroidLabel

```
java.lang.String getCentroidLabel()
```

:   Gets the label for this cluster. This can be a list of keywords
    or a descriptive label, etc.

    :   **Returns:**: the label for this cluster

---


### getItemCount

```
int getItemCount()
```

:   The number of items in this cluster.

    :   **Returns:**: the number of items in this cluster

---


### getCentroid

```
float[] getCentroid()
```

:   Gets the vector for the cluster centroid.

    :   **Returns:**

---


### getSimilarity

```
float getSimilarity(T item)
```

:   Gets the similarity score of the specified item with the centroid of this
    cluster.

    :   **Parameters:**: `item` - the item whose score we want **Returns:**: the similarity score of the specified item with the centroid of this cluster.

---


### items

```
java.lang.Iterable<anl.aida.util.ObjScore<T>> items()
```

:   Gets an iterable over all the items and score in this cluster.

    :   **Returns:**: an iterable over all the items and score in this cluster.


---


|  |  |  |  |  |  |  |  |  |  |  |
| --- | --- | --- | --- | --- | --- | --- | --- | --- | --- | --- |
| |  |  |  |  |  |  |  |  | | --- | --- | --- | --- | --- | --- | --- | --- | | **Overview** | **Package** | **Class** | **Use** | **Tree** | **Deprecated** | **Index** | **Help** | | |  |
| PREV CLASS   **NEXT CLASS** | **FRAMES**    **NO FRAMES**     **All Classes** |
| SUMMARY: NESTED | FIELD | CONSTR | METHOD | DETAIL: FIELD | CONSTR | METHOD |


---
