# Supplementary material
Source: MDPI journal article supplement (https://www.mdpi.com/2071-1050/2/5/1182)
Supplement: s1 [file s1 › Sustainability_Altaweel_EtAl/Client/docs/anl/aida/algo/Clusterer.html]

Clusterer


---


|  |  |  |  |  |  |  |  |  |  |  |
| --- | --- | --- | --- | --- | --- | --- | --- | --- | --- | --- |
| |  |  |  |  |  |  |  |  | | --- | --- | --- | --- | --- | --- | --- | --- | | **Overview** | **Package** | **Class** | **Use** | **Tree** | **Deprecated** | **Index** | **Help** | | |  |
| **PREV CLASS**   **NEXT CLASS** | **FRAMES**    **NO FRAMES**     **All Classes** |
| SUMMARY: NESTED | FIELD | CONSTR | METHOD | DETAIL: FIELD | CONSTR | METHOD |


---


## anl.aida.algo Interface Clusterer<T>

---

``` public interface Clusterer<T> ```

Date: Feb 13, 2009 10:15:34 AM

---

| **Method Summary** | |
| --- | --- |
| `Clusters<T>` | `cluster(int numClusters)`             Calculate the specified number of clusters and return the results. |
| `void` | `reset(java.lang.String label)`             Resets the clusterer for another run. |

| **Method Detail** |
| --- |

### reset

```
void reset(java.lang.String label)
```

:   Resets the clusterer for another run.

    :   **Parameters:**: `label` - the label of the clustering instances

---


### cluster

```
Clusters<T> cluster(int numClusters)
```

:   Calculate the specified number of clusters and return
    the results.

    :   **Parameters:**: `numClusters` - the number of clusters to caclulate **Returns:**: the cluster results


---


|  |  |  |  |  |  |  |  |  |  |  |
| --- | --- | --- | --- | --- | --- | --- | --- | --- | --- | --- |
| |  |  |  |  |  |  |  |  | | --- | --- | --- | --- | --- | --- | --- | --- | | **Overview** | **Package** | **Class** | **Use** | **Tree** | **Deprecated** | **Index** | **Help** | | |  |
| **PREV CLASS**   **NEXT CLASS** | **FRAMES**    **NO FRAMES**     **All Classes** |
| SUMMARY: NESTED | FIELD | CONSTR | METHOD | DETAIL: FIELD | CONSTR | METHOD |


---
