# Supplementary material
Source: MDPI journal article supplement (https://www.mdpi.com/2071-1050/2/5/1182)
Supplement: s1 [file s1 › Sustainability_Altaweel_EtAl/Client/docs/anl/aida/algo/Clusters.html]

Clusters


---


|  |  |  |  |  |  |  |  |  |  |  |
| --- | --- | --- | --- | --- | --- | --- | --- | --- | --- | --- |
| |  |  |  |  |  |  |  |  | | --- | --- | --- | --- | --- | --- | --- | --- | | **Overview** | **Package** | **Class** | **Use** | **Tree** | **Deprecated** | **Index** | **Help** | | |  |
| **PREV CLASS**   **NEXT CLASS** | **FRAMES**    **NO FRAMES**     **All Classes** |
| SUMMARY: NESTED | FIELD | CONSTR | METHOD | DETAIL: FIELD | CONSTR | METHOD |


---


## anl.aida.algo Interface Clusters<T>

**All Known Implementing Classes:**: ClustersBuilder.DefClusters

---

``` public interface Clusters<T> ```

Date: Feb 16, 2009 11:56:53 AM

---

| **Method Summary** | |
| --- | --- |
| `java.lang.Iterable<? extends Cluster<T>>` | `clusters()`             Gets an iterable over all the Clusters contained by this collection. |
| `Cluster<T>` | `getCluster(int index)`             Gets the cluster at the specified index. |
| `float` | `getScore(T item, int clusterIndex)`             Gets the similarity score of the specified item with the specified cluster centriod. |
| `int` | `itemCount()`             Gets the total number of clustered items. |
| `java.lang.Iterable<T>` | `items()`             Gets an iterable over all the clustered items in this collection. |
| `int` | `size()`             Gets the number of clusters in this collection. |

| **Method Detail** |
| --- |

### getScore

```
float getScore(T item,
               int clusterIndex)
```

:   Gets the similarity score of the specified item
    with the specified cluster centriod.

    :   **Parameters:**: `item` - the item whose score we want: `clusterIndex` - the index of the cluster containing the relevant centroid **Returns:**: the similarity score of the specified item with the specified cluster centriod.

---


### size

```
int size()
```

:   Gets the number of clusters in this collection.

    :   **Returns:**: the number of clusters in this collection.

---


### itemCount

```
int itemCount()
```

:   Gets the total number of clustered items.

    :   **Returns:**: the total number of clustered items.

---


### items

```
java.lang.Iterable<T> items()
```

:   Gets an iterable over all the clustered items in this collection.
    Each item is contained by one or more clusters.

    :   **Returns:**: an iterable over all the clustered items in this collection.

---


### clusters

```
java.lang.Iterable<? extends Cluster<T>> clusters()
```

:   Gets an iterable over all the Clusters contained by this collection.

    :   **Returns:**: an iterable over all the Clusters contained by this collection.

---


### getCluster

```
Cluster<T> getCluster(int index)
```

:   Gets the cluster at the specified index.

    :   **Parameters:**: `index` - the index of the cluster **Returns:**: the cluster at the specified index.


---


|  |  |  |  |  |  |  |  |  |  |  |
| --- | --- | --- | --- | --- | --- | --- | --- | --- | --- | --- |
| |  |  |  |  |  |  |  |  | | --- | --- | --- | --- | --- | --- | --- | --- | | **Overview** | **Package** | **Class** | **Use** | **Tree** | **Deprecated** | **Index** | **Help** | | |  |
| **PREV CLASS**   **NEXT CLASS** | **FRAMES**    **NO FRAMES**     **All Classes** |
| SUMMARY: NESTED | FIELD | CONSTR | METHOD | DETAIL: FIELD | CONSTR | METHOD |


---
