# Supplementary material
Source: MDPI journal article supplement (https://www.mdpi.com/2071-1050/2/5/1182)
Supplement: s1 [file s1 › Sustainability_Altaweel_EtAl/Client/docs/anl/aida/algo/ClustersBuilder.html]

ClustersBuilder


---


|  |  |  |  |  |  |  |  |  |  |  |
| --- | --- | --- | --- | --- | --- | --- | --- | --- | --- | --- |
| |  |  |  |  |  |  |  |  | | --- | --- | --- | --- | --- | --- | --- | --- | | **Overview** | **Package** | **Class** | **Use** | **Tree** | **Deprecated** | **Index** | **Help** | | |  |
| **PREV CLASS**   **NEXT CLASS** | **FRAMES**    **NO FRAMES**     **All Classes** |
| SUMMARY: NESTED | FIELD | CONSTR | METHOD | DETAIL: FIELD | CONSTR | METHOD |


---


## anl.aida.algo Class ClustersBuilder<T>

```
java.lang.Object
  anl.aida.algo.ClustersBuilder<T>
```

---

``` public class ClustersBuilder<T> extends java.lang.Object ```

Builder for clusters.

---

| **Nested Class Summary** | |
| --- | --- |
| `private static class` | `ClustersBuilder.DefClusters<T>` |


| **Field Summary** | |
| --- | --- |
| `private  java.util.List<SimilarityCluster<T>>` | `clusters` |
| `private  java.util.Map<T,float[]>` | `itemScores` |


| **Constructor Summary** | |
| --- | --- |
| `ClustersBuilder()` |


| **Method Summary** | |
| --- | --- |
| `void` | `addCluster(float[] vals, java.lang.String... labels)` |
| `private  void` | `addItemScore(T item, int cluster, float score)` |
| `void` | `addItemToCluster(T item, int clusterIndex, double[] itemVector)`             Adds an item to the specified cluster. |
| `void` | `addItemToCluster(T item, int clusterIndex, float score)`             Adds an item to the specified cluster. |
| `Clusters<T>` | `buildClusters()`             Builds a Clusters instance out of the data that has been added between any calls to buildCluster. |
| `int` | `clusterCount()` |
| `void` | `itemScore(T item, int clusterIndex, double[] itemVector)`             Calculates the specified items similarity score for the specified cluster. |

| **Methods inherited from class java.lang.Object** |
| --- |
| `clone, equals, finalize, getClass, hashCode, notify, notifyAll, toString, wait, wait, wait` |

| **Field Detail** |
| --- |

### clusters

```
private java.util.List<SimilarityCluster<T>> clusters
```

---


### itemScores

```
private java.util.Map<T,float[]> itemScores
```


| **Constructor Detail** |
| --- |

### ClustersBuilder

```
public ClustersBuilder()
```


| **Method Detail** |
| --- |

### addCluster

```
public void addCluster(float[] vals,
                       java.lang.String... labels)
```

---


### addItemToCluster

```
public void addItemToCluster(T item,
                             int clusterIndex,
                             double[] itemVector)
```

:   Adds an item to the specified cluster. The items similarity with that cluster
    will be calculated using the itemVector and the cluster's centroid.

    :   **Parameters:**: `item` - the item to add: `clusterIndex` - the index of the cluster to add the item to: `itemVector` - the item's vector

---


### addItemToCluster

```
public void addItemToCluster(T item,
                             int clusterIndex,
                             float score)
```

:   Adds an item to the specified cluster. The items similarity with that cluster
    will be calculated using the itemVector and the cluster's centroid.

    :   **Parameters:**: `item` - the item to add: `clusterIndex` - the index of the cluster to add the item to: `score` - the item's score

---


### clusterCount

```
public int clusterCount()
```

---


### itemScore

```
public void itemScore(T item,
                      int clusterIndex,
                      double[] itemVector)
```

:   Calculates the specified items similarity score for the specified cluster.

    :   **Parameters:**: `item` - the item to add: `clusterIndex` - the index of the cluster to add the item to: `itemVector` - the item's vector

---


### addItemScore

```
private void addItemScore(T item,
                          int cluster,
                          float score)
```

---


### buildClusters

```
public Clusters<T> buildClusters()
```

:   Builds a Clusters instance out of the data that has been added
    between any calls to buildCluster.

    :   **Returns:**: the built Clusters instance


---


|  |  |  |  |  |  |  |  |  |  |  |
| --- | --- | --- | --- | --- | --- | --- | --- | --- | --- | --- |
| |  |  |  |  |  |  |  |  | | --- | --- | --- | --- | --- | --- | --- | --- | | **Overview** | **Package** | **Class** | **Use** | **Tree** | **Deprecated** | **Index** | **Help** | | |  |
| **PREV CLASS**   **NEXT CLASS** | **FRAMES**    **NO FRAMES**     **All Classes** |
| SUMMARY: NESTED | FIELD | CONSTR | METHOD | DETAIL: FIELD | CONSTR | METHOD |


---
