# Supplementary material
Source: MDPI journal article supplement (https://www.mdpi.com/2071-1050/2/5/1182)
Supplement: s1 [file s1 › Sustainability_Altaweel_EtAl/Client/docs/anl/aida/algo/ConceptClusterer.html]

ConceptClusterer


---


|  |  |  |  |  |  |  |  |  |  |  |
| --- | --- | --- | --- | --- | --- | --- | --- | --- | --- | --- |
| |  |  |  |  |  |  |  |  | | --- | --- | --- | --- | --- | --- | --- | --- | | **Overview** | **Package** | **Class** | **Use** | **Tree** | **Deprecated** | **Index** | **Help** | | |  |
| **PREV CLASS**   **NEXT CLASS** | **FRAMES**    **NO FRAMES**     **All Classes** |
| SUMMARY: NESTED | FIELD | CONSTR | METHOD | DETAIL: FIELD | CONSTR | METHOD |


---


## anl.aida.algo Class ConceptClusterer

```
java.lang.Object
  anl.aida.algo.ConceptClusterer
```

---

``` public class ConceptClusterer extends java.lang.Object ```

---

| **Field Summary** | |
| --- | --- |
| `private  java.lang.Iterable<anl.aida.core.MIFSDocument>` | `docIterator` |
| `private  anl.aida.sv.SemanticVectorStore` | `vecStore` |


| **Constructor Summary** | |
| --- | --- |
| `ConceptClusterer(java.lang.Iterable<anl.aida.core.MIFSDocument> docIterator, anl.aida.sv.SemanticVectorStore vecStore)` |


| **Method Summary** | |
| --- | --- |
| `Clusters<anl.aida.core.DocumentID>` | `generateClusters(java.util.List<java.lang.String> concepts)` |

| **Methods inherited from class java.lang.Object** |
| --- |
| `clone, equals, finalize, getClass, hashCode, notify, notifyAll, toString, wait, wait, wait` |

| **Field Detail** |
| --- |

### docIterator

```
private java.lang.Iterable<anl.aida.core.MIFSDocument> docIterator
```

---


### vecStore

```
private anl.aida.sv.SemanticVectorStore vecStore
```


| **Constructor Detail** |
| --- |

### ConceptClusterer

```
public ConceptClusterer(java.lang.Iterable<anl.aida.core.MIFSDocument> docIterator,
                        anl.aida.sv.SemanticVectorStore vecStore)
```


| **Method Detail** |
| --- |

### generateClusters

```
public Clusters<anl.aida.core.DocumentID> generateClusters(java.util.List<java.lang.String> concepts)
                                                    throws java.io.IOException
```

:   **Throws:**: `java.io.IOException`


---


|  |  |  |  |  |  |  |  |  |  |  |
| --- | --- | --- | --- | --- | --- | --- | --- | --- | --- | --- |
| |  |  |  |  |  |  |  |  | | --- | --- | --- | --- | --- | --- | --- | --- | | **Overview** | **Package** | **Class** | **Use** | **Tree** | **Deprecated** | **Index** | **Help** | | |  |
| **PREV CLASS**   **NEXT CLASS** | **FRAMES**    **NO FRAMES**     **All Classes** |
| SUMMARY: NESTED | FIELD | CONSTR | METHOD | DETAIL: FIELD | CONSTR | METHOD |


---
