# Supplementary material
Source: MDPI journal article supplement (https://www.mdpi.com/2071-1050/2/5/1182)
Supplement: s1 [file s1 › Sustainability_Altaweel_EtAl/Client/docs/anl/aida/algo/ConceptGenerator.html]

ConceptGenerator


---


|  |  |  |  |  |  |  |  |  |  |  |
| --- | --- | --- | --- | --- | --- | --- | --- | --- | --- | --- |
| |  |  |  |  |  |  |  |  | | --- | --- | --- | --- | --- | --- | --- | --- | | **Overview** | **Package** | **Class** | **Use** | **Tree** | **Deprecated** | **Index** | **Help** | | |  |
| **PREV CLASS**   **NEXT CLASS** | **FRAMES**    **NO FRAMES**     **All Classes** |
| SUMMARY: NESTED | FIELD | CONSTR | METHOD | DETAIL: FIELD | CONSTR | METHOD |


---


## anl.aida.algo Interface ConceptGenerator

**All Known Implementing Classes:**: DefaultConceptGenerator, SVConceptGenerator

---

``` public interface ConceptGenerator ```

Interface for classes that generate a scored list of concepts.

---

| **Method Summary** | |
| --- | --- |
| `java.lang.Iterable<ScoredKeyword>` | `generateConcepts(int count)`             Generate the specified number of concepts. |

| **Method Detail** |
| --- |

### generateConcepts

```
java.lang.Iterable<ScoredKeyword> generateConcepts(int count)
                                                   throws anl.aida.util.AIDAException,
                                                          java.io.IOException
```

:   Generate the specified number of concepts.

    :   **Parameters:**: `count` - the suggested number of concepts to generate. **Returns:**: the concepts as MIFSTerms **Throws:**: `anl.aida.util.AIDAException` - if there is an error during generation: `java.io.IOException` - if there is an error during generation


---


|  |  |  |  |  |  |  |  |  |  |  |
| --- | --- | --- | --- | --- | --- | --- | --- | --- | --- | --- |
| |  |  |  |  |  |  |  |  | | --- | --- | --- | --- | --- | --- | --- | --- | | **Overview** | **Package** | **Class** | **Use** | **Tree** | **Deprecated** | **Index** | **Help** | | |  |
| **PREV CLASS**   **NEXT CLASS** | **FRAMES**    **NO FRAMES**     **All Classes** |
| SUMMARY: NESTED | FIELD | CONSTR | METHOD | DETAIL: FIELD | CONSTR | METHOD |


---
