# Supplementary material
Source: MDPI journal article supplement (https://www.mdpi.com/2071-1050/2/5/1182)
Supplement: s1 [file s1 › Sustainability_Altaweel_EtAl/Client/docs/anl/aida/algo/ConceptGeneratorProducer.html]

ConceptGeneratorProducer


---


|  |  |  |  |  |  |  |  |  |  |  |
| --- | --- | --- | --- | --- | --- | --- | --- | --- | --- | --- |
| |  |  |  |  |  |  |  |  | | --- | --- | --- | --- | --- | --- | --- | --- | | **Overview** | **Package** | **Class** | **Use** | **Tree** | **Deprecated** | **Index** | **Help** | | |  |
| **PREV CLASS**   **NEXT CLASS** | **FRAMES**    **NO FRAMES**     **All Classes** |
| SUMMARY: NESTED | FIELD | CONSTR | METHOD | DETAIL: FIELD | CONSTR | METHOD |


---


## anl.aida.algo Interface ConceptGeneratorProducer

**All Known Implementing Classes:**: KeywordsConceptGeneratorProducer, SVConceptGeneratorProducer

---

``` public interface ConceptGeneratorProducer ```

Interface for classes that can produce concept generators.
This can be used as the elements in a combo box, for example,
to select which concepts will be created.

---

| **Method Summary** | |
| --- | --- |
| `ConceptGenerator` | `createGenerator(CacheElement element)`             Creates a concept generator, optionally using the cache element. |
| `java.lang.String` | `getName()`             Gets a descriptive name for this producer. |

| **Method Detail** |
| --- |

### createGenerator

```
ConceptGenerator createGenerator(CacheElement element)
```

:   Creates a concept generator, optionally using the cache element.

    :   **Parameters:**: `element` - the CacheElement to use **Returns:**: the created ConceptGenerator

---


### getName

```
java.lang.String getName()
```

:   Gets a descriptive name for this producer.

    :   **Returns:**: a descriptive name for this producer.


---


|  |  |  |  |  |  |  |  |  |  |  |
| --- | --- | --- | --- | --- | --- | --- | --- | --- | --- | --- |
| |  |  |  |  |  |  |  |  | | --- | --- | --- | --- | --- | --- | --- | --- | | **Overview** | **Package** | **Class** | **Use** | **Tree** | **Deprecated** | **Index** | **Help** | | |  |
| **PREV CLASS**   **NEXT CLASS** | **FRAMES**    **NO FRAMES**     **All Classes** |
| SUMMARY: NESTED | FIELD | CONSTR | METHOD | DETAIL: FIELD | CONSTR | METHOD |


---
