# Supplementary material
Source: MDPI journal article supplement (https://www.mdpi.com/2071-1050/2/5/1182)
Supplement: s1 [file s1 › Sustainability_Altaweel_EtAl/Client/docs/anl/aida/algo/DefaultConceptGenerator.html]

DefaultConceptGenerator


---


|  |  |  |  |  |  |  |  |  |  |  |
| --- | --- | --- | --- | --- | --- | --- | --- | --- | --- | --- |
| |  |  |  |  |  |  |  |  | | --- | --- | --- | --- | --- | --- | --- | --- | | **Overview** | **Package** | **Class** | **Use** | **Tree** | **Deprecated** | **Index** | **Help** | | |  |
| **PREV CLASS**   **NEXT CLASS** | **FRAMES**    **NO FRAMES**     **All Classes** |
| SUMMARY: NESTED | FIELD | CONSTR | METHOD | DETAIL: FIELD | CONSTR | METHOD |


---


## anl.aida.algo Class DefaultConceptGenerator

```
java.lang.Object
  anl.aida.algo.DefaultConceptGenerator
```

**All Implemented Interfaces:**: ConceptGenerator

---

``` public class DefaultConceptGenerator extends java.lang.Object implements ConceptGenerator ```

Generates scored concepts from a predetermined list of concepts.

---

| **Nested Class Summary** | |
| --- | --- |
| `private static class` | `DefaultConceptGenerator.ScoredKeywordImpl` |


| **Field Summary** | |
| --- | --- |
| `private  java.util.List<Keyword>` | `concepts` |
| `private  anl.aida.core.ScoredTermsCollection` | `stc` |


| **Constructor Summary** | |
| --- | --- |
| `DefaultConceptGenerator(java.util.Collection<Keyword> concepts, anl.aida.core.ScoredTermsCollection stc)`             Creates a DefaultConceptGenerator. |


| **Method Summary** | |
| --- | --- |
| `java.lang.Iterable<ScoredKeyword>` | `generateConcepts(int count)`             Generate the specified number of concepts. |

| **Methods inherited from class java.lang.Object** |
| --- |
| `clone, equals, finalize, getClass, hashCode, notify, notifyAll, toString, wait, wait, wait` |

| **Field Detail** |
| --- |

### concepts

```
private java.util.List<Keyword> concepts
```

---


### stc

```
private anl.aida.core.ScoredTermsCollection stc
```


| **Constructor Detail** |
| --- |

### DefaultConceptGenerator

```
public DefaultConceptGenerator(java.util.Collection<Keyword> concepts,
                               anl.aida.core.ScoredTermsCollection stc)
```

:   Creates a DefaultConceptGenerator. The scored
    results will be retrieved from the stc.

    **Parameters:**: `concepts` -: `stc` -


| **Method Detail** |
| --- |

### generateConcepts

```
public java.lang.Iterable<ScoredKeyword> generateConcepts(int count)
                                                   throws anl.aida.util.AIDAException,
                                                          java.io.IOException
```

:   **Description copied from interface: `ConceptGenerator`**
:   Generate the specified number of concepts.

    :   **Specified by:**: `generateConcepts` in interface `ConceptGenerator`
    :   **Parameters:**: `count` - the suggested number of concepts to generate. **Returns:**: the concepts as MIFSTerms **Throws:**: `anl.aida.util.AIDAException` - if there is an error during generation: `java.io.IOException` - if there is an error during generation


---


|  |  |  |  |  |  |  |  |  |  |  |
| --- | --- | --- | --- | --- | --- | --- | --- | --- | --- | --- |
| |  |  |  |  |  |  |  |  | | --- | --- | --- | --- | --- | --- | --- | --- | | **Overview** | **Package** | **Class** | **Use** | **Tree** | **Deprecated** | **Index** | **Help** | | |  |
| **PREV CLASS**   **NEXT CLASS** | **FRAMES**    **NO FRAMES**     **All Classes** |
| SUMMARY: NESTED | FIELD | CONSTR | METHOD | DETAIL: FIELD | CONSTR | METHOD |


---
