# Supplementary material
Source: MDPI journal article supplement (https://www.mdpi.com/2071-1050/2/5/1182)
Supplement: s1 [file s1 › Sustainability_Altaweel_EtAl/Client/docs/anl/aida/algo/DefaultConceptGenerator.ScoredKeywordImpl.html]

DefaultConceptGenerator.ScoredKeywordImpl


---


|  |  |  |  |  |  |  |  |  |  |  |
| --- | --- | --- | --- | --- | --- | --- | --- | --- | --- | --- |
| |  |  |  |  |  |  |  |  | | --- | --- | --- | --- | --- | --- | --- | --- | | **Overview** | **Package** | **Class** | **Use** | **Tree** | **Deprecated** | **Index** | **Help** | | |  |
| **PREV CLASS**   **NEXT CLASS** | **FRAMES**    **NO FRAMES**     **All Classes** |
| SUMMARY: NESTED | FIELD | CONSTR | METHOD | DETAIL: FIELD | CONSTR | METHOD |


---


## anl.aida.algo Class DefaultConceptGenerator.ScoredKeywordImpl

```
java.lang.Object
  anl.aida.algo.DefaultConceptGenerator.ScoredKeywordImpl
```

**All Implemented Interfaces:**: ScoredKeyword, Keyword, java.lang.Comparable<Keyword>

**Enclosing class:**: DefaultConceptGenerator

---

``` private static class DefaultConceptGenerator.ScoredKeywordImpl extends java.lang.Object implements ScoredKeyword ```

---

| **Field Summary** | |
| --- | --- |
| `private  java.lang.String` | `dispString` |
| `private  anl.aida.core.MIFSTerm` | `term` |


| **Constructor Summary** | |
| --- | --- |
| `DefaultConceptGenerator.ScoredKeywordImpl(Keyword word, anl.aida.core.MIFSTerm term)` |


| **Method Summary** | |
| --- | --- |
| `int` | `compareTo(Keyword o)` |
| `int` | `getDocumentCount()`             Gets the number of documents associated with this concept. |
| `java.lang.String` | `getLabel()`             Gets this Keyword's label. |
| `float` | `getScore()`             Gets this concept's score. |
| `java.lang.String` | `getTerm()`             Gets this Keyword's term text. |

| **Methods inherited from class java.lang.Object** |
| --- |
| `clone, equals, finalize, getClass, hashCode, notify, notifyAll, toString, wait, wait, wait` |

| **Field Detail** |
| --- |

### term

```
private anl.aida.core.MIFSTerm term
```

---


### dispString

```
private java.lang.String dispString
```


| **Constructor Detail** |
| --- |

### DefaultConceptGenerator.ScoredKeywordImpl

```
public DefaultConceptGenerator.ScoredKeywordImpl(Keyword word,
                                                 anl.aida.core.MIFSTerm term)
```


| **Method Detail** |
| --- |

### getLabel

```
public java.lang.String getLabel()
```

:   **Description copied from interface: `Keyword`**
:   Gets this Keyword's label.

    :   **Specified by:**: `getLabel` in interface `Keyword`
    :   **Returns:**: this Keyword's label.

---


### getDocumentCount

```
public int getDocumentCount()
```

:   **Description copied from interface: `ScoredKeyword`**
:   Gets the number of documents associated with this concept.

    :   **Specified by:**: `getDocumentCount` in interface `ScoredKeyword`
    :   **Returns:**: the number of documents associated with this concept.

---


### getScore

```
public float getScore()
```

:   **Description copied from interface: `ScoredKeyword`**
:   Gets this concept's score.

    :   **Specified by:**: `getScore` in interface `ScoredKeyword`
    :   **Returns:**: this concept's score.

---


### getTerm

```
public java.lang.String getTerm()
```

:   **Description copied from interface: `Keyword`**
:   Gets this Keyword's term text.

    :   **Specified by:**: `getTerm` in interface `Keyword`
    :   **Returns:**: this Keyword's term text.

---


### compareTo

```
public int compareTo(Keyword o)
```

:   **Specified by:**: `compareTo` in interface `java.lang.Comparable<Keyword>`


---


|  |  |  |  |  |  |  |  |  |  |  |
| --- | --- | --- | --- | --- | --- | --- | --- | --- | --- | --- |
| |  |  |  |  |  |  |  |  | | --- | --- | --- | --- | --- | --- | --- | --- | | **Overview** | **Package** | **Class** | **Use** | **Tree** | **Deprecated** | **Index** | **Help** | | |  |
| **PREV CLASS**   **NEXT CLASS** | **FRAMES**    **NO FRAMES**     **All Classes** |
| SUMMARY: NESTED | FIELD | CONSTR | METHOD | DETAIL: FIELD | CONSTR | METHOD |


---
