# Supplementary material
Source: MDPI journal article supplement (https://www.mdpi.com/2071-1050/2/5/1182)
Supplement: s1 [file s1 › Sustainability_Altaweel_EtAl/Client/docs/anl/aida/algo/DefaultScoredKeyword.html]

DefaultScoredKeyword


---


|  |  |  |  |  |  |  |  |  |  |  |
| --- | --- | --- | --- | --- | --- | --- | --- | --- | --- | --- |
| |  |  |  |  |  |  |  |  | | --- | --- | --- | --- | --- | --- | --- | --- | | **Overview** | **Package** | **Class** | **Use** | **Tree** | **Deprecated** | **Index** | **Help** | | |  |
| **PREV CLASS**   **NEXT CLASS** | **FRAMES**    **NO FRAMES**     **All Classes** |
| SUMMARY: NESTED | FIELD | CONSTR | METHOD | DETAIL: FIELD | CONSTR | METHOD |


---


## anl.aida.algo Class DefaultScoredKeyword

```
java.lang.Object
  anl.aida.algo.DefaultScoredKeyword
```

**All Implemented Interfaces:**: ScoredKeyword, Keyword, java.lang.Comparable<Keyword>

---

``` public class DefaultScoredKeyword extends java.lang.Object implements ScoredKeyword ```

Default implementation of Concept

---

| **Field Summary** | |
| --- | --- |
| `private  int` | `count` |
| `private  Keyword` | `keyword` |
| `private  float` | `score` |


| **Constructor Summary** | |
| --- | --- |
| `DefaultScoredKeyword(int count, float score, Keyword keyword)` |
| `DefaultScoredKeyword(int count, float score, java.lang.String text)` |


| **Method Summary** | |
| --- | --- |
| `int` | `compareTo(Keyword o)` |
| `int` | `getDocumentCount()`             Gets the number of documents associated with this concept. |
| `java.lang.String` | `getLabel()`             Gets this Keyword's label. |
| `float` | `getScore()`             Gets this concept's score. |
| `java.lang.String` | `getTerm()`             Gets this Keyword's term text. |

| **Methods inherited from class java.lang.Object** |
| --- |
| `clone, equals, finalize, getClass, hashCode, notify, notifyAll, toString, wait, wait, wait` |

| **Field Detail** |
| --- |

### count

```
private int count
```

---


### score

```
private float score
```

---


### keyword

```
private Keyword keyword
```


| **Constructor Detail** |
| --- |

### DefaultScoredKeyword

```
public DefaultScoredKeyword(int count,
                            float score,
                            java.lang.String text)
```

---


### DefaultScoredKeyword

```
public DefaultScoredKeyword(int count,
                            float score,
                            Keyword keyword)
```

**Parameters:**: `count` -: `score` -: `text` -


| **Method Detail** |
| --- |

### getDocumentCount

```
public int getDocumentCount()
```

:   **Description copied from interface: `ScoredKeyword`**
:   Gets the number of documents associated with this concept.

    :   **Specified by:**: `getDocumentCount` in interface `ScoredKeyword`
    :   **Returns:**: the number of documents associated with this concept.

---


### getScore

```
public float getScore()
```

:   **Description copied from interface: `ScoredKeyword`**
:   Gets this concept's score.

    :   **Specified by:**: `getScore` in interface `ScoredKeyword`
    :   **Returns:**: this concept's score.

---


### getLabel

```
public java.lang.String getLabel()
```

:   **Description copied from interface: `Keyword`**
:   Gets this Keyword's label.

    :   **Specified by:**: `getLabel` in interface `Keyword`
    :   **Returns:**: this Keyword's label.

---


### getTerm

```
public java.lang.String getTerm()
```

:   **Description copied from interface: `Keyword`**
:   Gets this Keyword's term text.

    :   **Specified by:**: `getTerm` in interface `Keyword`
    :   **Returns:**: this Keyword's term text.

---


### compareTo

```
public int compareTo(Keyword o)
```

:   **Specified by:**: `compareTo` in interface `java.lang.Comparable<Keyword>`


---


|  |  |  |  |  |  |  |  |  |  |  |
| --- | --- | --- | --- | --- | --- | --- | --- | --- | --- | --- |
| |  |  |  |  |  |  |  |  | | --- | --- | --- | --- | --- | --- | --- | --- | | **Overview** | **Package** | **Class** | **Use** | **Tree** | **Deprecated** | **Index** | **Help** | | |  |
| **PREV CLASS**   **NEXT CLASS** | **FRAMES**    **NO FRAMES**     **All Classes** |
| SUMMARY: NESTED | FIELD | CONSTR | METHOD | DETAIL: FIELD | CONSTR | METHOD |


---
