# Supplementary material
Source: MDPI journal article supplement (https://www.mdpi.com/2071-1050/2/5/1182)
Supplement: s1 [file s1 › Sustainability_Altaweel_EtAl/Client/docs/anl/aida/algo/KeywordsConceptGeneratorProducer.html]

KeywordsConceptGeneratorProducer


---


|  |  |  |  |  |  |  |  |  |  |  |
| --- | --- | --- | --- | --- | --- | --- | --- | --- | --- | --- |
| |  |  |  |  |  |  |  |  | | --- | --- | --- | --- | --- | --- | --- | --- | | **Overview** | **Package** | **Class** | **Use** | **Tree** | **Deprecated** | **Index** | **Help** | | |  |
| **PREV CLASS**   **NEXT CLASS** | **FRAMES**    **NO FRAMES**     **All Classes** |
| SUMMARY: NESTED | FIELD | CONSTR | METHOD | DETAIL: FIELD | CONSTR | METHOD |


---


## anl.aida.algo Class KeywordsConceptGeneratorProducer

```
java.lang.Object
  anl.aida.algo.KeywordsConceptGeneratorProducer
```

**All Implemented Interfaces:**: ConceptGeneratorProducer

---

``` public class KeywordsConceptGeneratorProducer extends java.lang.Object implements ConceptGeneratorProducer ```

ConceptGenerator producer that produces a ConceptGenerator that creates concepts
from a list of keywords.

---

| **Field Summary** | |
| --- | --- |
| `private static java.lang.String` | `ALL_KEYWORDS` |
| `private  Keywords` | `keywords` |
| `private  java.lang.String` | `keywordSet` |


| **Constructor Summary** | |
| --- | --- |
| `KeywordsConceptGeneratorProducer(Keywords keywords)`             Creates a KeywordsConceptGeneratorProducer that will produce concepts from all the keywords in the keywords collection. |
| `KeywordsConceptGeneratorProducer(Keywords keywords, java.lang.String keywordSet)`             Creates a KeywordsConceptGeneratorProducer that will produce concepts from the specified keyword set. |


| **Method Summary** | |
| --- | --- |
| `ConceptGenerator` | `createGenerator(CacheElement element)`             Creates a concept generator, optionally using the cache element. |
| `java.lang.String` | `getName()`             Gets a descriptive name for this producer. |

| **Methods inherited from class java.lang.Object** |
| --- |
| `clone, equals, finalize, getClass, hashCode, notify, notifyAll, toString, wait, wait, wait` |

| **Field Detail** |
| --- |

### ALL\_KEYWORDS

```
private static java.lang.String ALL_KEYWORDS
```

---


### keywords

```
private Keywords keywords
```

---


### keywordSet

```
private java.lang.String keywordSet
```


| **Constructor Detail** |
| --- |

### KeywordsConceptGeneratorProducer

```
public KeywordsConceptGeneratorProducer(Keywords keywords,
                                        java.lang.String keywordSet)
```

:   Creates a KeywordsConceptGeneratorProducer that will produce concepts
    from the specified keyword set.

    **Parameters:**: `keywords` - the keywords collection to use: `keywordSet` - the name of the keyword set to use

---


### KeywordsConceptGeneratorProducer

```
public KeywordsConceptGeneratorProducer(Keywords keywords)
```

:   Creates a KeywordsConceptGeneratorProducer that will produce concepts
    from all the keywords in the keywords collection.

    **Parameters:**: `keywords` - the keywords collection to use


| **Method Detail** |
| --- |

### createGenerator

```
public ConceptGenerator createGenerator(CacheElement element)
```

:   **Description copied from interface: `ConceptGeneratorProducer`**
:   Creates a concept generator, optionally using the cache element.

    :   **Specified by:**: `createGenerator` in interface `ConceptGeneratorProducer`
    :   **Parameters:**: `element` - the CacheElement to use **Returns:**: the created ConceptGenerator

---


### getName

```
public java.lang.String getName()
```

:   **Description copied from interface: `ConceptGeneratorProducer`**
:   Gets a descriptive name for this producer.

    :   **Specified by:**: `getName` in interface `ConceptGeneratorProducer`
    :   **Returns:**: a descriptive name for this producer.


---


|  |  |  |  |  |  |  |  |  |  |  |
| --- | --- | --- | --- | --- | --- | --- | --- | --- | --- | --- |
| |  |  |  |  |  |  |  |  | | --- | --- | --- | --- | --- | --- | --- | --- | | **Overview** | **Package** | **Class** | **Use** | **Tree** | **Deprecated** | **Index** | **Help** | | |  |
| **PREV CLASS**   **NEXT CLASS** | **FRAMES**    **NO FRAMES**     **All Classes** |
| SUMMARY: NESTED | FIELD | CONSTR | METHOD | DETAIL: FIELD | CONSTR | METHOD |


---
