# Supplementary material
Source: MDPI journal article supplement (https://www.mdpi.com/2071-1050/2/5/1182)
Supplement: s1 [file s1 › Sustainability_Altaweel_EtAl/Client/docs/anl/aida/algo/package-frame.html]

anl.aida.algo


anl.aida.algo

|  |
| --- |
| Interfaces    *Cluster*   *Clusterer*   *ClusterResults*   *Clusters*   *ConceptGenerator*   *ConceptGeneratorProducer*   *ScoredKeyword* |

|  |
| --- |
| Classes    ClustersBuilder   ClustersBuilder.DefClusters   ConceptClusterer   DefaultConceptGenerator   DefaultConceptGenerator.ScoredKeywordImpl   DefaultScoredKeyword   KeywordsConceptGeneratorProducer   SimilarityCluster   SVConceptGenerator   SVConceptGeneratorProducer |
