# Supplementary material
Source: MDPI journal article supplement (https://www.mdpi.com/2071-1050/2/5/1182)
Supplement: s1 [file s1 › Sustainability_Altaweel_EtAl/Client/docs/anl/aida/algo/package-summary.html]

anl.aida.algo


---


|  |  |  |  |  |  |  |  |  |  |  |
| --- | --- | --- | --- | --- | --- | --- | --- | --- | --- | --- |
| |  |  |  |  |  |  |  |  | | --- | --- | --- | --- | --- | --- | --- | --- | | **Overview** | **Package** | Class | **Use** | **Tree** | **Deprecated** | **Index** | **Help** | | |  |
| **PREV PACKAGE**   **NEXT PACKAGE** | **FRAMES**    **NO FRAMES**     **All Classes** |


---

## Package anl.aida.algo

| **Interface Summary** | |
| --- | --- |
| **Cluster<T>** | Interface for a Cluster as produced from a Clustering algorithm. |
| **Clusterer<T>** | Date: Feb 13, 2009 10:15:34 AM |
| **ClusterResults** | Interface for cluster results. |
| **Clusters<T>** | Date: Feb 16, 2009 11:56:53 AM |
| **ConceptGenerator** | Interface for classes that generate a scored list of concepts. |
| **ConceptGeneratorProducer** | Interface for classes that can produce concept generators. |
| **ScoredKeyword** | Associates a keyword with a a score and document count. |

| **Class Summary** | |
| --- | --- |
| **ClustersBuilder<T>** | Builder for clusters. |
| **ClustersBuilder.DefClusters<T>** |  |
| **ConceptClusterer** |  |
| **DefaultConceptGenerator** | Generates scored concepts from a predetermined list of concepts. |
| **DefaultConceptGenerator.ScoredKeywordImpl** |  |
| **DefaultScoredKeyword** | Default implementation of Concept |
| **KeywordsConceptGeneratorProducer** | ConceptGenerator producer that produces a ConceptGenerator that creates concepts from a list of keywords. |
| **SimilarityCluster<T>** | Encapsulates a centroid vector and a collection of items of type T and their similarity (0 to 1) with that centroid vector. |
| **SVConceptGenerator** | Generates concepts based on Semantic Vector scores. |
| **SVConceptGeneratorProducer** | Produces `SVConceptGenerator`. |

---


|  |  |  |  |  |  |  |  |  |  |  |
| --- | --- | --- | --- | --- | --- | --- | --- | --- | --- | --- |
| |  |  |  |  |  |  |  |  | | --- | --- | --- | --- | --- | --- | --- | --- | | **Overview** | **Package** | Class | **Use** | **Tree** | **Deprecated** | **Index** | **Help** | | |  |
| **PREV PACKAGE**   **NEXT PACKAGE** | **FRAMES**    **NO FRAMES**     **All Classes** |


---
