# Supplementary material
Source: MDPI journal article supplement (https://www.mdpi.com/2071-1050/2/5/1182)
Supplement: s1 [file s1 › Sustainability_Altaweel_EtAl/Client/docs/anl/aida/algo/package-tree.html]

anl.aida.algo Class Hierarchy


---


|  |  |  |  |  |  |  |  |  |  |  |
| --- | --- | --- | --- | --- | --- | --- | --- | --- | --- | --- |
| |  |  |  |  |  |  |  |  | | --- | --- | --- | --- | --- | --- | --- | --- | | **Overview** | **Package** | Class | Use | **Tree** | **Deprecated** | **Index** | **Help** | | |  |
| **PREV**   **NEXT** | **FRAMES**    **NO FRAMES**     **All Classes** |


---


## Hierarchy For Package anl.aida.algo

**Package Hierarchies:**: All Packages

---

## Class Hierarchy

- java.lang.Object
  - anl.aida.algo.**ClustersBuilder**<T>- anl.aida.algo.**ClustersBuilder.DefClusters**<T> (implements anl.aida.algo.Clusters<T>)- anl.aida.algo.**ConceptClusterer**- anl.aida.algo.**DefaultConceptGenerator** (implements anl.aida.algo.ConceptGenerator)- anl.aida.algo.**DefaultConceptGenerator.ScoredKeywordImpl** (implements anl.aida.algo.ScoredKeyword)- anl.aida.algo.**DefaultScoredKeyword** (implements anl.aida.algo.ScoredKeyword)- anl.aida.algo.**KeywordsConceptGeneratorProducer** (implements anl.aida.algo.ConceptGeneratorProducer)- anl.aida.algo.**SimilarityCluster**<T> (implements anl.aida.algo.Cluster<T>)- anl.aida.algo.**SVConceptGenerator** (implements anl.aida.algo.ConceptGenerator)- anl.aida.algo.**SVConceptGeneratorProducer** (implements anl.aida.algo.ConceptGeneratorProducer)

## Interface Hierarchy

- anl.aida.algo.**Cluster**<T>- anl.aida.algo.**Clusterer**<T>- anl.aida.algo.**ClusterResults**- anl.aida.algo.**Clusters**<T>- java.lang.Comparable<T>
          - anl.aida.client.**Keyword**
            - anl.aida.algo.**ScoredKeyword**- anl.aida.algo.**ConceptGenerator**- anl.aida.algo.**ConceptGeneratorProducer**

---


|  |  |  |  |  |  |  |  |  |  |  |
| --- | --- | --- | --- | --- | --- | --- | --- | --- | --- | --- |
| |  |  |  |  |  |  |  |  | | --- | --- | --- | --- | --- | --- | --- | --- | | **Overview** | **Package** | Class | Use | **Tree** | **Deprecated** | **Index** | **Help** | | |  |
| **PREV**   **NEXT** | **FRAMES**    **NO FRAMES**     **All Classes** |


---
