# Supplementary material
Source: MDPI journal article supplement (https://www.mdpi.com/2071-1050/2/5/1182)
Supplement: s1 [file s1 › Sustainability_Altaweel_EtAl/Client/docs/anl/aida/algo/package-use.html]

Uses of Package anl.aida.algo


---


|  |  |  |  |  |  |  |  |  |  |  |
| --- | --- | --- | --- | --- | --- | --- | --- | --- | --- | --- |
| |  |  |  |  |  |  |  |  | | --- | --- | --- | --- | --- | --- | --- | --- | | **Overview** | **Package** | Class | **Use** | **Tree** | **Deprecated** | **Index** | **Help** | | |  |
| PREV   NEXT | **FRAMES**    **NO FRAMES**     **All Classes** |


---


## **Uses of Package anl.aida.algo**

| Packages that use anl.aida.algo | |
| --- | --- |
| **anl.aida.algo** |  |
| **anl.aida.client** |  |
| **anl.aida.client.gui** |  |
| **anl.aida.viz** |  |

| Classes in anl.aida.algo used by anl.aida.algo | |
| --- | --- |
| ****Cluster****             Interface for a Cluster as produced from a Clustering algorithm. |
| ****Clusters****             Date: Feb 16, 2009 11:56:53 AM |
| ****ConceptGenerator****             Interface for classes that generate a scored list of concepts. |
| ****ConceptGeneratorProducer****             Interface for classes that can produce concept generators. |
| ****ScoredKeyword****             Associates a keyword with a a score and document count. |
| ****SimilarityCluster****             Encapsulates a centroid vector and a collection of items of type T and their similarity (0 to 1) with that centroid vector. |

| Classes in anl.aida.algo used by anl.aida.client | |
| --- | --- |
| ****Clusterer****             Date: Feb 13, 2009 10:15:34 AM |

| Classes in anl.aida.algo used by anl.aida.client.gui | |
| --- | --- |
| ****Clusterer****             Date: Feb 13, 2009 10:15:34 AM |
| ****Clusters****             Date: Feb 16, 2009 11:56:53 AM |
| ****ScoredKeyword****             Associates a keyword with a a score and document count. |

| Classes in anl.aida.algo used by anl.aida.viz | |
| --- | --- |
| ****Clusters****             Date: Feb 16, 2009 11:56:53 AM |

---


|  |  |  |  |  |  |  |  |  |  |  |
| --- | --- | --- | --- | --- | --- | --- | --- | --- | --- | --- |
| |  |  |  |  |  |  |  |  | | --- | --- | --- | --- | --- | --- | --- | --- | | **Overview** | **Package** | Class | **Use** | **Tree** | **Deprecated** | **Index** | **Help** | | |  |
| PREV   NEXT | **FRAMES**    **NO FRAMES**     **All Classes** |


---
