# Supplementary material
Source: MDPI journal article supplement (https://www.mdpi.com/2071-1050/2/5/1182)
Supplement: s1 [file s1 › Sustainability_Altaweel_EtAl/Client/docs/anl/aida/algo/ScoredKeyword.html]

ScoredKeyword


---


|  |  |  |  |  |  |  |  |  |  |  |
| --- | --- | --- | --- | --- | --- | --- | --- | --- | --- | --- |
| |  |  |  |  |  |  |  |  | | --- | --- | --- | --- | --- | --- | --- | --- | | **Overview** | **Package** | **Class** | **Use** | **Tree** | **Deprecated** | **Index** | **Help** | | |  |
| **PREV CLASS**   **NEXT CLASS** | **FRAMES**    **NO FRAMES**     **All Classes** |
| SUMMARY: NESTED | FIELD | CONSTR | METHOD | DETAIL: FIELD | CONSTR | METHOD |


---


## anl.aida.algo Interface ScoredKeyword

**All Superinterfaces:**: java.lang.Comparable<Keyword>, Keyword

**All Known Implementing Classes:**: DefaultConceptGenerator.ScoredKeywordImpl, DefaultScoredKeyword

---

``` public interface ScoredKeyword extends Keyword ```

Associates a keyword with a a score and document count.

---

| **Method Summary** | |
| --- | --- |
| `int` | `getDocumentCount()`             Gets the number of documents associated with this concept. |
| `float` | `getScore()`             Gets this concept's score. |

| **Methods inherited from interface anl.aida.client.Keyword** |
| --- |
| `getLabel, getTerm` |

| **Methods inherited from interface java.lang.Comparable** |
| --- |
| `compareTo` |

| **Method Detail** |
| --- |

### getScore

```
float getScore()
```

:   Gets this concept's score.

    :   **Returns:**: this concept's score.

---


### getDocumentCount

```
int getDocumentCount()
```

:   Gets the number of documents associated with this concept.

    :   **Returns:**: the number of documents associated with this concept.


---


|  |  |  |  |  |  |  |  |  |  |  |
| --- | --- | --- | --- | --- | --- | --- | --- | --- | --- | --- |
| |  |  |  |  |  |  |  |  | | --- | --- | --- | --- | --- | --- | --- | --- | | **Overview** | **Package** | **Class** | **Use** | **Tree** | **Deprecated** | **Index** | **Help** | | |  |
| **PREV CLASS**   **NEXT CLASS** | **FRAMES**    **NO FRAMES**     **All Classes** |
| SUMMARY: NESTED | FIELD | CONSTR | METHOD | DETAIL: FIELD | CONSTR | METHOD |


---
