# Supplementary material
Source: MDPI journal article supplement (https://www.mdpi.com/2071-1050/2/5/1182)
Supplement: s1 [file s1 › Sustainability_Altaweel_EtAl/Client/docs/anl/aida/algo/SimilarityCluster.html]

SimilarityCluster


---


|  |  |  |  |  |  |  |  |  |  |  |
| --- | --- | --- | --- | --- | --- | --- | --- | --- | --- | --- |
| |  |  |  |  |  |  |  |  | | --- | --- | --- | --- | --- | --- | --- | --- | | **Overview** | **Package** | **Class** | **Use** | **Tree** | **Deprecated** | **Index** | **Help** | | |  |
| **PREV CLASS**   **NEXT CLASS** | **FRAMES**    **NO FRAMES**     **All Classes** |
| SUMMARY: NESTED | FIELD | CONSTR | METHOD | DETAIL: FIELD | CONSTR | METHOD |


---


## anl.aida.algo Class SimilarityCluster<T>

```
java.lang.Object
  anl.aida.algo.SimilarityCluster<T>
```

**All Implemented Interfaces:**: Cluster<T>

---

``` public class SimilarityCluster<T> extends java.lang.Object implements Cluster<T> ```

Encapsulates a centroid vector and a collection
of items of type T and their similarity (0 to 1) with that centroid
vector.

---

| **Field Summary** | |
| --- | --- |
| `private  java.util.Map<T,anl.aida.util.ObjScore<T>>` | `items` |
| `private  java.lang.String[]` | `labels` |
| `private  java.lang.String` | `labelString` |
| `private  float[]` | `vector` |


| **Constructor Summary** | |
| --- | --- |
| `SimilarityCluster(float[] vector, java.lang.String... labels)`             Creates a SimilarityCluster with the specified vector and label. |


| **Method Summary** | |
| --- | --- |
| `protected  void` | `addItem(T item, float similarity)` |
| `float[]` | `getCentroid()`             Gets the vector for the cluster centroid. |
| `java.lang.String` | `getCentroidLabel()`             Gets the label for this cluster. |
| `int` | `getItemCount()`             The number of items in this cluster. |
| `float` | `getSimilarity(T item)`             Gets the similarity score for the specified item with respect to the cluster centroid. |
| `java.lang.Iterable<anl.aida.util.ObjScore<T>>` | `items()`             Gets an iterable over all the items and score in this cluster. |

| **Methods inherited from class java.lang.Object** |
| --- |
| `clone, equals, finalize, getClass, hashCode, notify, notifyAll, toString, wait, wait, wait` |

| **Field Detail** |
| --- |

### vector

```
private float[] vector
```

---


### labelString

```
private java.lang.String labelString
```

---


### labels

```
private java.lang.String[] labels
```

---


### items

```
private java.util.Map<T,anl.aida.util.ObjScore<T>> items
```


| **Constructor Detail** |
| --- |

### SimilarityCluster

```
public SimilarityCluster(float[] vector,
                         java.lang.String... labels)
```

:   Creates a SimilarityCluster with the specified vector and label.

    **Parameters:**: `vector` - the centroids vector: `labels` - the centroids labels


| **Method Detail** |
| --- |

### addItem

```
protected void addItem(T item,
                       float similarity)
```

---


### getCentroidLabel

```
public java.lang.String getCentroidLabel()
```

:   Gets the label for this cluster. This can be a list of keywords
    or a descriptive label, etc.

    :   **Specified by:**: `getCentroidLabel` in interface `Cluster<T>`
    :   **Returns:**: the label for this cluster

---


### getItemCount

```
public int getItemCount()
```

:   The number of items in this cluster.

    :   **Specified by:**: `getItemCount` in interface `Cluster<T>`
    :   **Returns:**: the number of items in this cluster

---


### getCentroid

```
public float[] getCentroid()
```

:   Gets the vector for the cluster centroid.

    :   **Specified by:**: `getCentroid` in interface `Cluster<T>`
    :   **Returns:**: the vector for the cluster centroid

---


### getSimilarity

```
public float getSimilarity(T item)
```

:   Gets the similarity score for the specified item
    with respect to the cluster centroid.

    :   **Specified by:**: `getSimilarity` in interface `Cluster<T>`
    :   **Parameters:**: `item` - the item whose score we want. **Returns:**: the similarity score for the specified item with respect to the cluster centroid, or -1 if the item is not found.

---


### items

```
public java.lang.Iterable<anl.aida.util.ObjScore<T>> items()
```

:   **Description copied from interface: `Cluster`**
:   Gets an iterable over all the items and score in this cluster.

    :   **Specified by:**: `items` in interface `Cluster<T>`
    :   **Returns:**: an iterable over all the items and score in this cluster.


---


|  |  |  |  |  |  |  |  |  |  |  |
| --- | --- | --- | --- | --- | --- | --- | --- | --- | --- | --- |
| |  |  |  |  |  |  |  |  | | --- | --- | --- | --- | --- | --- | --- | --- | | **Overview** | **Package** | **Class** | **Use** | **Tree** | **Deprecated** | **Index** | **Help** | | |  |
| **PREV CLASS**   **NEXT CLASS** | **FRAMES**    **NO FRAMES**     **All Classes** |
| SUMMARY: NESTED | FIELD | CONSTR | METHOD | DETAIL: FIELD | CONSTR | METHOD |


---
