# Supplementary material
Source: MDPI journal article supplement (https://www.mdpi.com/2071-1050/2/5/1182)
Supplement: s1 [file s1 › Sustainability_Altaweel_EtAl/Client/docs/anl/aida/bubble/AbstractAxis.html]

AbstractAxis


---


|  |  |  |  |  |  |  |  |  |  |  |
| --- | --- | --- | --- | --- | --- | --- | --- | --- | --- | --- |
| |  |  |  |  |  |  |  |  | | --- | --- | --- | --- | --- | --- | --- | --- | | **Overview** | **Package** | **Class** | **Use** | **Tree** | **Deprecated** | **Index** | **Help** | | |  |
| PREV CLASS   **NEXT CLASS** | **FRAMES**    **NO FRAMES**     **All Classes** |
| SUMMARY: NESTED | FIELD | CONSTR | METHOD | DETAIL: FIELD | CONSTR | METHOD |


---


## anl.aida.bubble Class AbstractAxis

```
java.lang.Object
  edu.umd.cs.piccolo.PNode
      edu.umd.cs.piccolox.nodes.PComposite
          anl.aida.bubble.AbstractAxis
```

**All Implemented Interfaces:**: java.awt.print.Printable, java.io.Serializable, java.lang.Cloneable

**Direct Known Subclasses:**: AbstractDomainAxis, RangeAxis

---

``` public abstract class AbstractAxis extends edu.umd.cs.piccolox.nodes.PComposite ```

**See Also:**: Serialized Form

---

| **Nested Class Summary** | |
| --- | --- |

| **Nested classes/interfaces inherited from class edu.umd.cs.piccolo.PNode** |
| --- |
| `edu.umd.cs.piccolo.PNode.PSceneGraphDelegate` |


| **Field Summary** | |
| --- | --- |
| `protected  edu.umd.cs.piccolo.nodes.PText` | `axisLabel` |
| `protected  edu.umd.cs.piccolo.PCanvas` | `canvas` |
| `protected  AxisHighlight` | `highlight` |
| `protected  java.text.DecimalFormat` | `highlightFormatter` |
| `protected  int` | `insets` |
| `protected  java.lang.String` | `label` |
| `protected  java.text.DecimalFormat` | `labelFormatter` |
| `protected  NumericRange` | `origRange` |
| `protected  float` | `pixelExtent` |
| `protected  NumericRange` | `range` |
| `protected  java.util.List<java.lang.Float>` | `tickLocations` |

| **Fields inherited from class edu.umd.cs.piccolo.PNode** |
| --- |
| `PROPERTY_BOUNDS, PROPERTY_CHILDREN, PROPERTY_CHILDREN_PICKABLE, PROPERTY_CLIENT_PROPERTIES, PROPERTY_CODE_BOUNDS, PROPERTY_CODE_CHILDREN, PROPERTY_CODE_CHILDREN_PICKABLE, PROPERTY_CODE_CLIENT_PROPERTIES, PROPERTY_CODE_FULL_BOUNDS, PROPERTY_CODE_PAINT, PROPERTY_CODE_PARENT, PROPERTY_CODE_PICKABLE, PROPERTY_CODE_TRANSFORM, PROPERTY_CODE_TRANSPARENCY, PROPERTY_CODE_VISIBLE, PROPERTY_FULL_BOUNDS, PROPERTY_PAINT, PROPERTY_PARENT, PROPERTY_PICKABLE, PROPERTY_TRANSFORM, PROPERTY_TRANSPARENCY, PROPERTY_VISIBLE, SCENE_GRAPH_DELEGATE` |

| **Fields inherited from interface java.awt.print.Printable** |
| --- |
| `NO_SUCH_PAGE, PAGE_EXISTS` |


| **Constructor Summary** | |
| --- | --- |
| `AbstractAxis(NumericRange range, java.lang.String label)` |


| **Method Summary** | |
| --- | --- |
| `java.lang.String` | `getLabel()` |
| `float` | `getPixelExtent()` |
| `abstract  float` | `getPixelLocation(double val)`             Gets the pixel location for the data value. |
| `protected  float` | `getPixelLocationLin(double val)`             Gets the pixel location for the data value in a linear scale. |
| `protected  float` | `getPixelLocationLog(double val)`             Gets the pixel location for the data value in a log scale. |
| `java.lang.Iterable<java.lang.Float>` | `getTickLocations()` |
| `abstract  double` | `getValueForPixel(double pixel)`             Gets the axis value for the pixel location. |
| `protected  double` | `getValueForPixelLin(double pixel)` |
| `protected  double` | `getValueForPixelLog(double pixel)` |
| `abstract  void` | `highlight(double val)` |
| `protected  void` | `initRange(double extra)` |
| `protected abstract  void` | `layout()` |
| `void` | `removeHighlight()` |
| `void` | `resetRange()`             Resets axis to its original range. |
| `void` | `setLabel(java.lang.String label)` |
| `void` | `zoomTo(NumericRange range)`             Zooms the axis such that it shows the specified range. |

| **Methods inherited from class edu.umd.cs.piccolox.nodes.PComposite** |
| --- |
| `fullPick` |

| **Methods inherited from class edu.umd.cs.piccolo.PNode** |
| --- |
| `addActivity, addAttribute, addChild, addChild, addChildren, addClientProperty, addInputEventListener, addPropertyChangeListener, addPropertyChangeListener, animateToBounds, animateToColor, animateToPositionScaleRotation, animateToTransform, animateToTransparency, animateTransformToBounds, centerBoundsOnPoint, centerFullBoundsOnPoint, clone, computeFullBounds, endResizeBounds, findIntersectingNodes, fireChildPropertyChange, firePropertyChange, fullIntersects, fullPaint, getAllNodes, getAllNodes, getAttribute, getAttribute, getBooleanAttribute, getBounds, getBoundsChanged, getBoundsReference, getBoundsVolatile, getChild, getChildBoundsInvalid, getChildBoundsVolatile, getChildPaintInvalid, getChildrenCount, getChildrenIterator, getChildrenPickable, getChildrenReference, getClientProperties, getClientProperty, getClientPropertyKeysEnumeration, getClientPropertyKeysIterator, getDoubleAttribute, getFullBounds, getFullBoundsInvalid, getFullBoundsReference, getGlobalBounds, getGlobalFullBounds, getGlobalRotation, getGlobalScale, getGlobalToLocalTransform, getGlobalTranslation, getHeight, getIntegerAttribute, getInverseTransform, getListenerList, getLocalToGlobalTransform, getOccluded, getOffset, getPaint, getPaintInvalid, getParent, getPickable, getPropertyChangeParentMask, getRoot, getRotation, getScale, getTransform, getTransformReference, getTransparency, getUnionOfChildrenBounds, getVisible, getWidth, getX, getXOffset, getY, getYOffset, globalToLocal, globalToLocal, globalToLocal, indexOfChild, internalUpdateBounds, intersects, invalidateFullBounds, invalidateLayout, invalidatePaint, isAncestorOf, isDescendentOf, isDescendentOfRoot, isOpaque, layoutChildren, lerp, localToGlobal, localToGlobal, localToGlobal, localToParent, localToParent, localToParent, moveInBackOf, moveInFrontOf, moveToBack, moveToFront, offset, paint, paintAfterChildren, paramString, parentBoundsChanged, parentToLocal, parentToLocal, parentToLocal, pick, pickAfterChildren, position, print, print, removeAllChildren, removeChild, removeChild, removeChildren, removeFromParent, removeInputEventListener, removePropertyChangeListener, removePropertyChangeListener, repaint, repaintFrom, reparent, replaceWith, resetBounds, rotate, rotateAboutPoint, rotateAboutPoint, rotateInPlace, scale, scaleAboutPoint, scaleAboutPoint, setBounds, setBounds, setBoundsChanged, setChildBoundsInvalid, setChildBoundsVolatile, setChildPaintInvalid, setChildrenPickable, setFullBoundsInvalid, setGlobalRotation, setGlobalScale, setGlobalTranslation, setHeight, setOccluded, setOffset, setOffset, setPaint, setPaintInvalid, setParent, setPickable, setPropertyChangeParentMask, setRotation, setScale, setTransform, setTransparency, setVisible, setWidth, setX, setY, signalBoundsChanged, startResizeBounds, toImage, toImage, toImage, toString, transformBy, translate, validateFullBounds, validateFullPaint` |

| **Methods inherited from class java.lang.Object** |
| --- |
| `equals, finalize, getClass, hashCode, notify, notifyAll, wait, wait, wait` |

| **Field Detail** |
| --- |

### highlightFormatter

```
protected java.text.DecimalFormat highlightFormatter
```

---


### labelFormatter

```
protected java.text.DecimalFormat labelFormatter
```

---


### range

```
protected NumericRange range
```

---


### origRange

```
protected NumericRange origRange
```

---


### label

```
protected java.lang.String label
```

---


### canvas

```
protected edu.umd.cs.piccolo.PCanvas canvas
```

---


### insets

```
protected int insets
```

---


### pixelExtent

```
protected float pixelExtent
```

---


### tickLocations

```
protected java.util.List<java.lang.Float> tickLocations
```

---


### highlight

```
protected AxisHighlight highlight
```

---


### axisLabel

```
protected edu.umd.cs.piccolo.nodes.PText axisLabel
```


| **Constructor Detail** |
| --- |

### AbstractAxis

```
public AbstractAxis(NumericRange range,
                    java.lang.String label)
```


| **Method Detail** |
| --- |

### initRange

```
protected void initRange(double extra)
```

---


### layout

```
protected abstract void layout()
```

---


### highlight

```
public abstract void highlight(double val)
```

---


### removeHighlight

```
public void removeHighlight()
```

---


### getPixelLocation

```
public abstract float getPixelLocation(double val)
```

:   Gets the pixel location for the data value.

    :   **Parameters:**: `val` - the value to get the pixel location for **Returns:**: the pixel location for the data value.

---


### getValueForPixel

```
public abstract double getValueForPixel(double pixel)
```

:   Gets the axis value for the pixel location.

    :   **Parameters:**: `pixel` - the pixel to get the axis value for **Returns:**: the axis value for the pixel location.

---


### zoomTo

```
public void zoomTo(NumericRange range)
```

:   Zooms the axis such that it shows the specified range.

    :   **Parameters:**: `range` - the range to zoom to.

---


### resetRange

```
public void resetRange()
```

:   Resets axis to its original range.

---


### getPixelLocationLin

```
protected float getPixelLocationLin(double val)
```

:   Gets the pixel location for the data value in a linear scale.

    :   **Parameters:**: `val` - the value to get the pixel location for **Returns:**: the pixel location for the data value.

---


### getValueForPixelLin

```
protected double getValueForPixelLin(double pixel)
```

---


### getPixelLocationLog

```
protected float getPixelLocationLog(double val)
```

:   Gets the pixel location for the data value in a log scale.

    :   **Parameters:**: `val` - the value to get the pixel location for **Returns:**: the pixel location for the data value in a log scale.

---


### getValueForPixelLog

```
protected double getValueForPixelLog(double pixel)
```

---


### getTickLocations

```
public java.lang.Iterable<java.lang.Float> getTickLocations()
```

---


### getPixelExtent

```
public float getPixelExtent()
```

---


### getLabel

```
public java.lang.String getLabel()
```

:   **Returns:**: the label

---


### setLabel

```
public void setLabel(java.lang.String label)
```

:   **Parameters:**: `label` - the label to set


---


|  |  |  |  |  |  |  |  |  |  |  |
| --- | --- | --- | --- | --- | --- | --- | --- | --- | --- | --- |
| |  |  |  |  |  |  |  |  | | --- | --- | --- | --- | --- | --- | --- | --- | | **Overview** | **Package** | **Class** | **Use** | **Tree** | **Deprecated** | **Index** | **Help** | | |  |
| PREV CLASS   **NEXT CLASS** | **FRAMES**    **NO FRAMES**     **All Classes** |
| SUMMARY: NESTED | FIELD | CONSTR | METHOD | DETAIL: FIELD | CONSTR | METHOD |


---
