# Supplementary material
Source: MDPI journal article supplement (https://www.mdpi.com/2071-1050/2/5/1182)
Supplement: s1 [file s1 › Sustainability_Altaweel_EtAl/Client/docs/anl/aida/bubble/AxisHighlight.html]

AxisHighlight


---


|  |  |  |  |  |  |  |  |  |  |  |
| --- | --- | --- | --- | --- | --- | --- | --- | --- | --- | --- |
| |  |  |  |  |  |  |  |  | | --- | --- | --- | --- | --- | --- | --- | --- | | **Overview** | **Package** | **Class** | **Use** | **Tree** | **Deprecated** | **Index** | **Help** | | |  |
| **PREV CLASS**   **NEXT CLASS** | **FRAMES**    **NO FRAMES**     **All Classes** |
| SUMMARY: NESTED | FIELD | CONSTR | METHOD | DETAIL: FIELD | CONSTR | METHOD |


---


## anl.aida.bubble Class AxisHighlight

```
java.lang.Object
  edu.umd.cs.piccolo.PNode
      anl.aida.bubble.AxisHighlight
```

**All Implemented Interfaces:**: java.awt.print.Printable, java.io.Serializable, java.lang.Cloneable

---

``` public class AxisHighlight extends edu.umd.cs.piccolo.PNode ```

**See Also:**: Serialized Form

---

| **Nested Class Summary** | |
| --- | --- |

| **Nested classes/interfaces inherited from class edu.umd.cs.piccolo.PNode** |
| --- |
| `edu.umd.cs.piccolo.PNode.PSceneGraphDelegate` |


| **Field Summary** | |
| --- | --- |
| `private  edu.umd.cs.piccolo.nodes.PText` | `pText` |

| **Fields inherited from class edu.umd.cs.piccolo.PNode** |
| --- |
| `PROPERTY_BOUNDS, PROPERTY_CHILDREN, PROPERTY_CHILDREN_PICKABLE, PROPERTY_CLIENT_PROPERTIES, PROPERTY_CODE_BOUNDS, PROPERTY_CODE_CHILDREN, PROPERTY_CODE_CHILDREN_PICKABLE, PROPERTY_CODE_CLIENT_PROPERTIES, PROPERTY_CODE_FULL_BOUNDS, PROPERTY_CODE_PAINT, PROPERTY_CODE_PARENT, PROPERTY_CODE_PICKABLE, PROPERTY_CODE_TRANSFORM, PROPERTY_CODE_TRANSPARENCY, PROPERTY_CODE_VISIBLE, PROPERTY_FULL_BOUNDS, PROPERTY_PAINT, PROPERTY_PARENT, PROPERTY_PICKABLE, PROPERTY_TRANSFORM, PROPERTY_TRANSPARENCY, PROPERTY_VISIBLE, SCENE_GRAPH_DELEGATE` |

| **Fields inherited from interface java.awt.print.Printable** |
| --- |
| `NO_SUCH_PAGE, PAGE_EXISTS` |


| **Constructor Summary** | |
| --- | --- |
| `AxisHighlight()` |


| **Method Summary** | |
| --- | --- |
| `void` | `update(java.lang.String text)` |

| **Methods inherited from class edu.umd.cs.piccolo.PNode** |
| --- |
| `addActivity, addAttribute, addChild, addChild, addChildren, addClientProperty, addInputEventListener, addPropertyChangeListener, addPropertyChangeListener, animateToBounds, animateToColor, animateToPositionScaleRotation, animateToTransform, animateToTransparency, animateTransformToBounds, centerBoundsOnPoint, centerFullBoundsOnPoint, clone, computeFullBounds, endResizeBounds, findIntersectingNodes, fireChildPropertyChange, firePropertyChange, fullIntersects, fullPaint, fullPick, getAllNodes, getAllNodes, getAttribute, getAttribute, getBooleanAttribute, getBounds, getBoundsChanged, getBoundsReference, getBoundsVolatile, getChild, getChildBoundsInvalid, getChildBoundsVolatile, getChildPaintInvalid, getChildrenCount, getChildrenIterator, getChildrenPickable, getChildrenReference, getClientProperties, getClientProperty, getClientPropertyKeysEnumeration, getClientPropertyKeysIterator, getDoubleAttribute, getFullBounds, getFullBoundsInvalid, getFullBoundsReference, getGlobalBounds, getGlobalFullBounds, getGlobalRotation, getGlobalScale, getGlobalToLocalTransform, getGlobalTranslation, getHeight, getIntegerAttribute, getInverseTransform, getListenerList, getLocalToGlobalTransform, getOccluded, getOffset, getPaint, getPaintInvalid, getParent, getPickable, getPropertyChangeParentMask, getRoot, getRotation, getScale, getTransform, getTransformReference, getTransparency, getUnionOfChildrenBounds, getVisible, getWidth, getX, getXOffset, getY, getYOffset, globalToLocal, globalToLocal, globalToLocal, indexOfChild, internalUpdateBounds, intersects, invalidateFullBounds, invalidateLayout, invalidatePaint, isAncestorOf, isDescendentOf, isDescendentOfRoot, isOpaque, layoutChildren, lerp, localToGlobal, localToGlobal, localToGlobal, localToParent, localToParent, localToParent, moveInBackOf, moveInFrontOf, moveToBack, moveToFront, offset, paint, paintAfterChildren, paramString, parentBoundsChanged, parentToLocal, parentToLocal, parentToLocal, pick, pickAfterChildren, position, print, print, removeAllChildren, removeChild, removeChild, removeChildren, removeFromParent, removeInputEventListener, removePropertyChangeListener, removePropertyChangeListener, repaint, repaintFrom, reparent, replaceWith, resetBounds, rotate, rotateAboutPoint, rotateAboutPoint, rotateInPlace, scale, scaleAboutPoint, scaleAboutPoint, setBounds, setBounds, setBoundsChanged, setChildBoundsInvalid, setChildBoundsVolatile, setChildPaintInvalid, setChildrenPickable, setFullBoundsInvalid, setGlobalRotation, setGlobalScale, setGlobalTranslation, setHeight, setOccluded, setOffset, setOffset, setPaint, setPaintInvalid, setParent, setPickable, setPropertyChangeParentMask, setRotation, setScale, setTransform, setTransparency, setVisible, setWidth, setX, setY, signalBoundsChanged, startResizeBounds, toImage, toImage, toImage, toString, transformBy, translate, validateFullBounds, validateFullPaint` |

| **Methods inherited from class java.lang.Object** |
| --- |
| `equals, finalize, getClass, hashCode, notify, notifyAll, wait, wait, wait` |

| **Field Detail** |
| --- |

### pText

```
private edu.umd.cs.piccolo.nodes.PText pText
```


| **Constructor Detail** |
| --- |

### AxisHighlight

```
public AxisHighlight()
```


| **Method Detail** |
| --- |

### update

```
public void update(java.lang.String text)
```


---


|  |  |  |  |  |  |  |  |  |  |  |
| --- | --- | --- | --- | --- | --- | --- | --- | --- | --- | --- |
| |  |  |  |  |  |  |  |  | | --- | --- | --- | --- | --- | --- | --- | --- | | **Overview** | **Package** | **Class** | **Use** | **Tree** | **Deprecated** | **Index** | **Help** | | |  |
| **PREV CLASS**   **NEXT CLASS** | **FRAMES**    **NO FRAMES**     **All Classes** |
| SUMMARY: NESTED | FIELD | CONSTR | METHOD | DETAIL: FIELD | CONSTR | METHOD |


---
