# Supplementary material
Source: MDPI journal article supplement (https://www.mdpi.com/2071-1050/2/5/1182)
Supplement: s1 [file s1 › Sustainability_Altaweel_EtAl/Client/docs/anl/aida/bubble/Bubble.html]

Bubble


---


|  |  |  |  |  |  |  |  |  |  |  |
| --- | --- | --- | --- | --- | --- | --- | --- | --- | --- | --- |
| |  |  |  |  |  |  |  |  | | --- | --- | --- | --- | --- | --- | --- | --- | | **Overview** | **Package** | **Class** | **Use** | **Tree** | **Deprecated** | **Index** | **Help** | | |  |
| **PREV CLASS**   **NEXT CLASS** | **FRAMES**    **NO FRAMES**     **All Classes** |
| SUMMARY: NESTED | FIELD | CONSTR | METHOD | DETAIL: FIELD | CONSTR | METHOD |


---


## anl.aida.bubble Class Bubble

```
java.lang.Object
  edu.umd.cs.piccolo.PNode
      edu.umd.cs.piccolox.nodes.PComposite
          anl.aida.bubble.Bubble
```

**All Implemented Interfaces:**: java.awt.print.Printable, java.io.Serializable, java.lang.Cloneable

---

``` public class Bubble extends edu.umd.cs.piccolox.nodes.PComposite ```

PNode that represents the bubble in the bubble graph.

**See Also:**: Serialized Form

---

| **Nested Class Summary** | |
| --- | --- |
| `static class` | `Bubble.State` |

| **Nested classes/interfaces inherited from class edu.umd.cs.piccolo.PNode** |
| --- |
| `edu.umd.cs.piccolo.PNode.PSceneGraphDelegate` |


| **Field Summary** | |
| --- | --- |
| `private  float` | `alpha` |
| `private  edu.umd.cs.piccolo.nodes.PPath` | `highlight` |
| `private  edu.umd.cs.piccolo.nodes.PText` | `pText` |
| `private  boolean` | `selected` |
| `private  edu.umd.cs.piccolo.nodes.PPath` | `shape` |
| `private  Bubble.State` | `state` |
| `private static java.awt.Stroke` | `stroke` |
| `private  float` | `unselectedAlpha` |

| **Fields inherited from class edu.umd.cs.piccolo.PNode** |
| --- |
| `PROPERTY_BOUNDS, PROPERTY_CHILDREN, PROPERTY_CHILDREN_PICKABLE, PROPERTY_CLIENT_PROPERTIES, PROPERTY_CODE_BOUNDS, PROPERTY_CODE_CHILDREN, PROPERTY_CODE_CHILDREN_PICKABLE, PROPERTY_CODE_CLIENT_PROPERTIES, PROPERTY_CODE_FULL_BOUNDS, PROPERTY_CODE_PAINT, PROPERTY_CODE_PARENT, PROPERTY_CODE_PICKABLE, PROPERTY_CODE_TRANSFORM, PROPERTY_CODE_TRANSPARENCY, PROPERTY_CODE_VISIBLE, PROPERTY_FULL_BOUNDS, PROPERTY_PAINT, PROPERTY_PARENT, PROPERTY_PICKABLE, PROPERTY_TRANSFORM, PROPERTY_TRANSPARENCY, PROPERTY_VISIBLE, SCENE_GRAPH_DELEGATE` |

| **Fields inherited from interface java.awt.print.Printable** |
| --- |
| `NO_SUCH_PAGE, PAGE_EXISTS` |


| **Constructor Summary** | |
| --- | --- |
| `Bubble(java.awt.Color color, float size)` |


| **Method Summary** | |
| --- | --- |
| `void` | `addAttribute(java.lang.Object key, java.lang.Object value)` |
| `java.lang.Object` | `getAttribute(java.lang.Object key)` |
| `java.lang.Object` | `getAttribute(java.lang.Object key, java.lang.Object def)` |
| `edu.umd.cs.piccolo.PNode` | `getShape()` |
| `Bubble.State` | `getState()` |
| `boolean` | `isHighlighted()` |
| `boolean` | `isSelected()` |
| `private  void` | `resetHighlightOffset()` |
| `void` | `setHighlight(boolean enabled)` |
| `void` | `setSelected(boolean selected)` |
| `void` | `setState(Bubble.State state)` |
| `void` | `update(float px, float py, double scale)` |
| `void` | `updateAnimate(float px, float py, double scale)` |

| **Methods inherited from class edu.umd.cs.piccolox.nodes.PComposite** |
| --- |
| `fullPick` |

| **Methods inherited from class edu.umd.cs.piccolo.PNode** |
| --- |
| `addActivity, addChild, addChild, addChildren, addClientProperty, addInputEventListener, addPropertyChangeListener, addPropertyChangeListener, animateToBounds, animateToColor, animateToPositionScaleRotation, animateToTransform, animateToTransparency, animateTransformToBounds, centerBoundsOnPoint, centerFullBoundsOnPoint, clone, computeFullBounds, endResizeBounds, findIntersectingNodes, fireChildPropertyChange, firePropertyChange, fullIntersects, fullPaint, getAllNodes, getAllNodes, getBooleanAttribute, getBounds, getBoundsChanged, getBoundsReference, getBoundsVolatile, getChild, getChildBoundsInvalid, getChildBoundsVolatile, getChildPaintInvalid, getChildrenCount, getChildrenIterator, getChildrenPickable, getChildrenReference, getClientProperties, getClientProperty, getClientPropertyKeysEnumeration, getClientPropertyKeysIterator, getDoubleAttribute, getFullBounds, getFullBoundsInvalid, getFullBoundsReference, getGlobalBounds, getGlobalFullBounds, getGlobalRotation, getGlobalScale, getGlobalToLocalTransform, getGlobalTranslation, getHeight, getIntegerAttribute, getInverseTransform, getListenerList, getLocalToGlobalTransform, getOccluded, getOffset, getPaint, getPaintInvalid, getParent, getPickable, getPropertyChangeParentMask, getRoot, getRotation, getScale, getTransform, getTransformReference, getTransparency, getUnionOfChildrenBounds, getVisible, getWidth, getX, getXOffset, getY, getYOffset, globalToLocal, globalToLocal, globalToLocal, indexOfChild, internalUpdateBounds, intersects, invalidateFullBounds, invalidateLayout, invalidatePaint, isAncestorOf, isDescendentOf, isDescendentOfRoot, isOpaque, layoutChildren, lerp, localToGlobal, localToGlobal, localToGlobal, localToParent, localToParent, localToParent, moveInBackOf, moveInFrontOf, moveToBack, moveToFront, offset, paint, paintAfterChildren, paramString, parentBoundsChanged, parentToLocal, parentToLocal, parentToLocal, pick, pickAfterChildren, position, print, print, removeAllChildren, removeChild, removeChild, removeChildren, removeFromParent, removeInputEventListener, removePropertyChangeListener, removePropertyChangeListener, repaint, repaintFrom, reparent, replaceWith, resetBounds, rotate, rotateAboutPoint, rotateAboutPoint, rotateInPlace, scale, scaleAboutPoint, scaleAboutPoint, setBounds, setBounds, setBoundsChanged, setChildBoundsInvalid, setChildBoundsVolatile, setChildPaintInvalid, setChildrenPickable, setFullBoundsInvalid, setGlobalRotation, setGlobalScale, setGlobalTranslation, setHeight, setOccluded, setOffset, setOffset, setPaint, setPaintInvalid, setParent, setPickable, setPropertyChangeParentMask, setRotation, setScale, setTransform, setTransparency, setVisible, setWidth, setX, setY, signalBoundsChanged, startResizeBounds, toImage, toImage, toImage, toString, transformBy, translate, validateFullBounds, validateFullPaint` |

| **Methods inherited from class java.lang.Object** |
| --- |
| `equals, finalize, getClass, hashCode, notify, notifyAll, wait, wait, wait` |

| **Field Detail** |
| --- |

### stroke

```
private static java.awt.Stroke stroke
```

---


### shape

```
private edu.umd.cs.piccolo.nodes.PPath shape
```

---


### pText

```
private edu.umd.cs.piccolo.nodes.PText pText
```

---


### highlight

```
private edu.umd.cs.piccolo.nodes.PPath highlight
```

---


### selected

```
private boolean selected
```

---


### alpha

```
private float alpha
```

---


### unselectedAlpha

```
private float unselectedAlpha
```

---


### state

```
private Bubble.State state
```


| **Constructor Detail** |
| --- |

### Bubble

```
public Bubble(java.awt.Color color,
              float size)
```


| **Method Detail** |
| --- |

### isHighlighted

```
public boolean isHighlighted()
```

---


### isSelected

```
public boolean isSelected()
```

:   **Returns:**: the selected

---


### setState

```
public void setState(Bubble.State state)
```

---


### getState

```
public Bubble.State getState()
```

---


### setSelected

```
public void setSelected(boolean selected)
```

:   **Parameters:**: `selected` - the selected to set

---


### setHighlight

```
public void setHighlight(boolean enabled)
```

---


### resetHighlightOffset

```
private void resetHighlightOffset()
```

---


### addAttribute

```
public void addAttribute(java.lang.Object key,
                         java.lang.Object value)
```

:   **Overrides:**: `addAttribute` in class `edu.umd.cs.piccolo.PNode`

---


### getAttribute

```
public java.lang.Object getAttribute(java.lang.Object key,
                                     java.lang.Object def)
```

:   **Overrides:**: `getAttribute` in class `edu.umd.cs.piccolo.PNode`

---


### getAttribute

```
public java.lang.Object getAttribute(java.lang.Object key)
```

:   **Overrides:**: `getAttribute` in class `edu.umd.cs.piccolo.PNode`

---


### getShape

```
public edu.umd.cs.piccolo.PNode getShape()
```

---


### updateAnimate

```
public void updateAnimate(float px,
                          float py,
                          double scale)
```

---


### update

```
public void update(float px,
                   float py,
                   double scale)
```


---


|  |  |  |  |  |  |  |  |  |  |  |
| --- | --- | --- | --- | --- | --- | --- | --- | --- | --- | --- |
| |  |  |  |  |  |  |  |  | | --- | --- | --- | --- | --- | --- | --- | --- | | **Overview** | **Package** | **Class** | **Use** | **Tree** | **Deprecated** | **Index** | **Help** | | |  |
| **PREV CLASS**   **NEXT CLASS** | **FRAMES**    **NO FRAMES**     **All Classes** |
| SUMMARY: NESTED | FIELD | CONSTR | METHOD | DETAIL: FIELD | CONSTR | METHOD |


---
