# Supplementary material
Source: MDPI journal article supplement (https://www.mdpi.com/2071-1050/2/5/1182)
Supplement: s1 [file s1 › Sustainability_Altaweel_EtAl/Client/docs/anl/aida/bubble/BubbleChart.Category.html]

BubbleChart.Category


---


|  |  |  |  |  |  |  |  |  |  |  |
| --- | --- | --- | --- | --- | --- | --- | --- | --- | --- | --- |
| |  |  |  |  |  |  |  |  | | --- | --- | --- | --- | --- | --- | --- | --- | | **Overview** | **Package** | **Class** | **Use** | **Tree** | **Deprecated** | **Index** | **Help** | | |  |
| **PREV CLASS**   **NEXT CLASS** | **FRAMES**    **NO FRAMES**     **All Classes** |
| SUMMARY: NESTED | FIELD | CONSTR | METHOD | DETAIL: FIELD | CONSTR | METHOD |


---


## anl.aida.bubble Class BubbleChart.Category

```
java.lang.Object
  anl.aida.bubble.BubbleChart.Category
```

**Enclosing class:**: BubbleChart

---

``` private static class BubbleChart.Category extends java.lang.Object ```

---

| **Field Summary** | |
| --- | --- |
| `(package private)  java.lang.String` | `category` |
| `(package private)  int` | `index` |


| **Constructor Summary** | |
| --- | --- |
| `BubbleChart.Category(java.lang.String category, int index)` |


| **Method Summary** | |
| --- | --- |
| `java.lang.String` | `toString()` |

| **Methods inherited from class java.lang.Object** |
| --- |
| `clone, equals, finalize, getClass, hashCode, notify, notifyAll, wait, wait, wait` |

| **Field Detail** |
| --- |

### category

```
java.lang.String category
```

---


### index

```
int index
```


| **Constructor Detail** |
| --- |

### BubbleChart.Category

```
public BubbleChart.Category(java.lang.String category,
                            int index)
```


| **Method Detail** |
| --- |

### toString

```
public java.lang.String toString()
```

:   **Overrides:**: `toString` in class `java.lang.Object`


---


|  |  |  |  |  |  |  |  |  |  |  |
| --- | --- | --- | --- | --- | --- | --- | --- | --- | --- | --- |
| |  |  |  |  |  |  |  |  | | --- | --- | --- | --- | --- | --- | --- | --- | | **Overview** | **Package** | **Class** | **Use** | **Tree** | **Deprecated** | **Index** | **Help** | | |  |
| **PREV CLASS**   **NEXT CLASS** | **FRAMES**    **NO FRAMES**     **All Classes** |
| SUMMARY: NESTED | FIELD | CONSTR | METHOD | DETAIL: FIELD | CONSTR | METHOD |


---
