# Supplementary material
Source: MDPI journal article supplement (https://www.mdpi.com/2071-1050/2/5/1182)
Supplement: s1 [file s1 › Sustainability_Altaweel_EtAl/Client/docs/anl/aida/bubble/BubbleChart.CategoryComparator.html]

BubbleChart.CategoryComparator


---


|  |  |  |  |  |  |  |  |  |  |  |
| --- | --- | --- | --- | --- | --- | --- | --- | --- | --- | --- |
| |  |  |  |  |  |  |  |  | | --- | --- | --- | --- | --- | --- | --- | --- | | **Overview** | **Package** | **Class** | **Use** | **Tree** | **Deprecated** | **Index** | **Help** | | |  |
| **PREV CLASS**   **NEXT CLASS** | **FRAMES**    **NO FRAMES**     **All Classes** |
| SUMMARY: NESTED | FIELD | CONSTR | METHOD | DETAIL: FIELD | CONSTR | METHOD |


---


## anl.aida.bubble Class BubbleChart.CategoryComparator

```
java.lang.Object
  anl.aida.bubble.BubbleChart.CategoryComparator
```

**All Implemented Interfaces:**: java.util.Comparator<BubbleChart.Category>

**Enclosing class:**: BubbleChart

---

``` private static class BubbleChart.CategoryComparator extends java.lang.Object implements java.util.Comparator<BubbleChart.Category> ```

---

| **Field Summary** | |
| --- | --- |
| `private  java.util.Comparator<java.lang.String>` | `comparator` |


| **Constructor Summary** | |
| --- | --- |
| `BubbleChart.CategoryComparator(java.util.Comparator<java.lang.String> comparator)` |


| **Method Summary** | |
| --- | --- |
| `int` | `compare(BubbleChart.Category o1, BubbleChart.Category o2)` |

| **Methods inherited from class java.lang.Object** |
| --- |
| `clone, equals, finalize, getClass, hashCode, notify, notifyAll, toString, wait, wait, wait` |

| **Methods inherited from interface java.util.Comparator** |
| --- |
| `equals` |

| **Field Detail** |
| --- |

### comparator

```
private java.util.Comparator<java.lang.String> comparator
```


| **Constructor Detail** |
| --- |

### BubbleChart.CategoryComparator

```
public BubbleChart.CategoryComparator(java.util.Comparator<java.lang.String> comparator)
```


| **Method Detail** |
| --- |

### compare

```
public int compare(BubbleChart.Category o1,
                   BubbleChart.Category o2)
```

:   **Specified by:**: `compare` in interface `java.util.Comparator<BubbleChart.Category>`


---


|  |  |  |  |  |  |  |  |  |  |  |
| --- | --- | --- | --- | --- | --- | --- | --- | --- | --- | --- |
| |  |  |  |  |  |  |  |  | | --- | --- | --- | --- | --- | --- | --- | --- | | **Overview** | **Package** | **Class** | **Use** | **Tree** | **Deprecated** | **Index** | **Help** | | |  |
| **PREV CLASS**   **NEXT CLASS** | **FRAMES**    **NO FRAMES**     **All Classes** |
| SUMMARY: NESTED | FIELD | CONSTR | METHOD | DETAIL: FIELD | CONSTR | METHOD |


---
