# Supplementary material
Source: MDPI journal article supplement (https://www.mdpi.com/2071-1050/2/5/1182)
Supplement: s1 [file s1 › Sustainability_Altaweel_EtAl/Client/docs/anl/aida/bubble/BubbleChart.html]

BubbleChart


---


|  |  |  |  |  |  |  |  |  |  |  |
| --- | --- | --- | --- | --- | --- | --- | --- | --- | --- | --- |
| |  |  |  |  |  |  |  |  | | --- | --- | --- | --- | --- | --- | --- | --- | | **Overview** | **Package** | **Class** | **Use** | **Tree** | **Deprecated** | **Index** | **Help** | | |  |
| **PREV CLASS**   **NEXT CLASS** | **FRAMES**    **NO FRAMES**     **All Classes** |
| SUMMARY: NESTED | FIELD | CONSTR | METHOD | DETAIL: FIELD | CONSTR | METHOD |


---


## anl.aida.bubble Class BubbleChart

```
java.lang.Object
  anl.aida.bubble.BubbleChart
```

---

``` public class BubbleChart extends java.lang.Object ```

---

| **Nested Class Summary** | |
| --- | --- |
| `private static class` | `BubbleChart.Category` |
| `private static class` | `BubbleChart.CategoryComparator` |


| **Field Summary** | |
| --- | --- |
| `private  edu.umd.cs.piccolo.PCanvas` | `canvas` |
| `private  BubbleChart.CategoryComparator` | `catComparator` |
| `private  boolean` | `catShowing` |
| `private  BubbleDataset` | `data` |
| `private  javax.swing.JButton` | `deselBtn` |
| `private  javax.swing.JButton` | `entityPanelBtn` |
| `private  boolean` | `ignoreSelection` |
| `private  com.jidesoft.swing.CheckBoxList` | `list` |
| `private  javax.swing.JPanel` | `listPanel` |
| `private  javax.swing.Icon` | `lowerIcon` |
| `private  javax.swing.JPanel` | `panel` |
| `private  BubblePlot` | `plot` |
| `private  javax.swing.Icon` | `raiseIcon` |
| `private  java.util.Set<BubbleChart.Category>` | `selections` |
| `private  BubbleSlider` | `slider` |


| **Constructor Summary** | |
| --- | --- |
| `BubbleChart(BubbleDataset data)` |


| **Method Summary** | |
| --- | --- |
| `private  void` | `flipEntityPanel()` |
| `java.util.Comparator<java.lang.String>` | `getCategoryComparator()`             Gets the comparator to use when sorting the category list. |
| `javax.swing.JPanel` | `getPanel()` |
| `BubblePlot` | `getPlot()` |
| `private  void` | `initCatList()` |
| `private  void` | `initListeners()` |
| `private  void` | `selectAll()` |
| `private  void` | `selectBubble(int catIndex)` |
| `private  void` | `selectBubbleBox(int catIndex)` |
| `void` | `setCategoryComparator(java.util.Comparator<java.lang.String> comparator)`             Sets the comparator to use when sorting the category list. |
| `private  void` | `unselectAll()` |
| `private  void` | `unselectBubbleBox(int catIndex)` |

| **Methods inherited from class java.lang.Object** |
| --- |
| `clone, equals, finalize, getClass, hashCode, notify, notifyAll, toString, wait, wait, wait` |

| **Field Detail** |
| --- |

### plot

```
private BubblePlot plot
```

---


### canvas

```
private edu.umd.cs.piccolo.PCanvas canvas
```

---


### panel

```
private javax.swing.JPanel panel
```

---


### listPanel

```
private javax.swing.JPanel listPanel
```

---


### list

```
private com.jidesoft.swing.CheckBoxList list
```

---


### ignoreSelection

```
private boolean ignoreSelection
```

---


### catShowing

```
private boolean catShowing
```

---


### selections

```
private java.util.Set<BubbleChart.Category> selections
```

---


### slider

```
private BubbleSlider slider
```

---


### data

```
private BubbleDataset data
```

---


### catComparator

```
private BubbleChart.CategoryComparator catComparator
```

---


### deselBtn

```
private javax.swing.JButton deselBtn
```

---


### entityPanelBtn

```
private javax.swing.JButton entityPanelBtn
```

---


### raiseIcon

```
private javax.swing.Icon raiseIcon
```

---


### lowerIcon

```
private javax.swing.Icon lowerIcon
```


| **Constructor Detail** |
| --- |

### BubbleChart

```
public BubbleChart(BubbleDataset data)
```


| **Method Detail** |
| --- |

### setCategoryComparator

```
public void setCategoryComparator(java.util.Comparator<java.lang.String> comparator)
```

:   Sets the comparator to use when sorting the category list.

    :   **Parameters:**: `comparator` - the comparator to use

---


### getCategoryComparator

```
public java.util.Comparator<java.lang.String> getCategoryComparator()
```

:   Gets the comparator to use when sorting the category list.

    :   **Returns:**: the comparator to use when sorting the category list.

---


### initCatList

```
private void initCatList()
```

---


### selectAll

```
private void selectAll()
```

---


### unselectAll

```
private void unselectAll()
```

---


### initListeners

```
private void initListeners()
```

---


### selectBubble

```
private void selectBubble(int catIndex)
```

---


### selectBubbleBox

```
private void selectBubbleBox(int catIndex)
```

---


### unselectBubbleBox

```
private void unselectBubbleBox(int catIndex)
```

---


### flipEntityPanel

```
private void flipEntityPanel()
```

---


### getPlot

```
public BubblePlot getPlot()
```

---


### getPanel

```
public javax.swing.JPanel getPanel()
```


---


|  |  |  |  |  |  |  |  |  |  |  |
| --- | --- | --- | --- | --- | --- | --- | --- | --- | --- | --- |
| |  |  |  |  |  |  |  |  | | --- | --- | --- | --- | --- | --- | --- | --- | | **Overview** | **Package** | **Class** | **Use** | **Tree** | **Deprecated** | **Index** | **Help** | | |  |
| **PREV CLASS**   **NEXT CLASS** | **FRAMES**    **NO FRAMES**     **All Classes** |
| SUMMARY: NESTED | FIELD | CONSTR | METHOD | DETAIL: FIELD | CONSTR | METHOD |


---
