# Supplementary material
Source: MDPI journal article supplement (https://www.mdpi.com/2071-1050/2/5/1182)
Supplement: s1 [file s1 › Sustainability_Altaweel_EtAl/Client/docs/anl/aida/bubble/BubbleData.html]

BubbleData


---


|  |  |  |  |  |  |  |  |  |  |  |
| --- | --- | --- | --- | --- | --- | --- | --- | --- | --- | --- |
| |  |  |  |  |  |  |  |  | | --- | --- | --- | --- | --- | --- | --- | --- | | **Overview** | **Package** | **Class** | **Use** | **Tree** | **Deprecated** | **Index** | **Help** | | |  |
| **PREV CLASS**   **NEXT CLASS** | **FRAMES**    **NO FRAMES**     **All Classes** |
| SUMMARY: NESTED | FIELD | CONSTR | METHOD | DETAIL: FIELD | CONSTR | METHOD |


---


## anl.aida.bubble Class BubbleData

```
java.lang.Object
  anl.aida.bubble.BubbleData
```

---

``` public class BubbleData extends java.lang.Object ```

Encapsulates the data represented by a single Bubble.

---

| **Field Summary** | |
| --- | --- |
| `(package private)  java.lang.String` | `category` |
| `(package private)  int` | `categoryIndex` |
| `(package private)  double` | `sizeVal` |
| `(package private)  double` | `xVal` |
| `(package private)  double` | `yVal` |


| **Constructor Summary** | |
| --- | --- |
| `BubbleData(java.lang.String category, int categoryIndex)` |


| **Method Summary** | |
| --- | --- |
| `java.lang.String` | `toString()` |
| `void` | `update(double x, double y, double size)` |

| **Methods inherited from class java.lang.Object** |
| --- |
| `clone, equals, finalize, getClass, hashCode, notify, notifyAll, wait, wait, wait` |

| **Field Detail** |
| --- |

### xVal

```
double xVal
```

---


### yVal

```
double yVal
```

---


### sizeVal

```
double sizeVal
```

---


### category

```
java.lang.String category
```

---


### categoryIndex

```
int categoryIndex
```


| **Constructor Detail** |
| --- |

### BubbleData

```
public BubbleData(java.lang.String category,
                  int categoryIndex)
```

**Parameters:**: `category` -: `categoryIndex` -


| **Method Detail** |
| --- |

### update

```
public void update(double x,
                   double y,
                   double size)
```

---


### toString

```
public java.lang.String toString()
```

:   **Overrides:**: `toString` in class `java.lang.Object`


---


|  |  |  |  |  |  |  |  |  |  |  |
| --- | --- | --- | --- | --- | --- | --- | --- | --- | --- | --- |
| |  |  |  |  |  |  |  |  | | --- | --- | --- | --- | --- | --- | --- | --- | | **Overview** | **Package** | **Class** | **Use** | **Tree** | **Deprecated** | **Index** | **Help** | | |  |
| **PREV CLASS**   **NEXT CLASS** | **FRAMES**    **NO FRAMES**     **All Classes** |
| SUMMARY: NESTED | FIELD | CONSTR | METHOD | DETAIL: FIELD | CONSTR | METHOD |


---
