# Supplementary material
Source: MDPI journal article supplement (https://www.mdpi.com/2071-1050/2/5/1182)
Supplement: s1 [file s1 › Sustainability_Altaweel_EtAl/Client/docs/anl/aida/bubble/BubbleDataset.html]

BubbleDataset


---


|  |  |  |  |  |  |  |  |  |  |  |
| --- | --- | --- | --- | --- | --- | --- | --- | --- | --- | --- |
| |  |  |  |  |  |  |  |  | | --- | --- | --- | --- | --- | --- | --- | --- | | **Overview** | **Package** | **Class** | **Use** | **Tree** | **Deprecated** | **Index** | **Help** | | |  |
| **PREV CLASS**   **NEXT CLASS** | **FRAMES**    **NO FRAMES**     **All Classes** |
| SUMMARY: NESTED | FIELD | CONSTR | METHOD | DETAIL: FIELD | CONSTR | METHOD |


---


## anl.aida.bubble Interface BubbleDataset

**All Known Implementing Classes:**: BubbleExperiments.Data, DefaultBubbleDataset

---

``` public interface BubbleDataset ```

Data access interface for a bubble chart. The shape of the
data is each category is a row and each column is some
numeric value of that category for that column. That shape
is then repeated for each timestep.

---

| **Method Summary** | |
| --- | --- |
| `java.lang.Iterable<java.lang.String>` | `categories()`             Gets an iterable over the categories in this dataset. |
| `int` | `getCategoryCount()`             Gets the number of categories in this dataset. |
| `int` | `getCategoryIndex(java.lang.String category)`             Gets the index of the specified category. |
| `java.lang.String` | `getFormattedTimeStep(int timestep)`             Gets the formatted timestep (e.g. |
| `int` | `getTimeStepCount()`             Gets the number of timesteps. |
| `NumericRange` | `getXRange()`             Gets the range of x values over all timesteps and categories. |
| `double` | `getXValue(int categoryIndex, int timestep)`             Gets the x value for the particular category at the specified timestep. |
| `NumericRange` | `getYRange()`             Gets the range of y values over all timesteps and categories. |
| `double` | `getYValue(int categoryIndex, int timestep)`             Gets the y value for the particular category at the specified timestep. |
| `NumericRange` | `getZRange()`             Gets the range of z values over all timesteps and categories. |
| `double` | `getZValue(int categoryIndex, int timestep)`             Gets the z value for the particular category at the specified timestep. |

| **Method Detail** |
| --- |

### categories

```
java.lang.Iterable<java.lang.String> categories()
```

:   Gets an iterable over the categories in this dataset.

    :   **Returns:**: an iterable over the categories in this dataset.

---


### getCategoryCount

```
int getCategoryCount()
```

:   Gets the number of categories in this dataset.

    :   **Returns:**: the number of categories in this dataset.

---


### getTimeStepCount

```
int getTimeStepCount()
```

:   Gets the number of timesteps.

    :   **Returns:**: the number of timesteps.

---


### getFormattedTimeStep

```
java.lang.String getFormattedTimeStep(int timestep)
```

:   Gets the formatted timestep (e.g. a formatted date,
    a year, etc.)

    :   **Parameters:**: `timestep` - the formatted timestep **Returns:**

---


### getCategoryIndex

```
int getCategoryIndex(java.lang.String category)
```

:   Gets the index of the specified category.

    :   **Parameters:**: `category` - the category whose index we want **Returns:**: the index of the specified category.

---


### getXValue

```
double getXValue(int categoryIndex,
                 int timestep)
```

:   Gets the x value for the particular category at the specified timestep.

    :   **Parameters:**: `categoryIndex` - the category index: `timestep` - the timestep **Returns:**: the x value for the particular category at the specified timestep.

---


### getYValue

```
double getYValue(int categoryIndex,
                 int timestep)
```

:   Gets the y value for the particular category at the specified timestep.

    :   **Parameters:**: `categoryIndex` - the category index: `timestep` - the timestep **Returns:**: the y value for the particular category at the specified timestep.

---


### getZValue

```
double getZValue(int categoryIndex,
                 int timestep)
```

:   Gets the z value for the particular category at the specified timestep.

    :   **Parameters:**: `categoryIndex` - the category index: `timestep` - the timestep **Returns:**: the z value for the particular category at the specified timestep.

---


### getXRange

```
NumericRange getXRange()
```

:   Gets the range of x values over all timesteps and categories.

    :   **Returns:**: the range of x values over all timesteps and categories.

---


### getYRange

```
NumericRange getYRange()
```

:   Gets the range of y values over all timesteps and categories.

    :   **Returns:**: the range of y values over all timesteps and categories.

---


### getZRange

```
NumericRange getZRange()
```

:   Gets the range of z values over all timesteps and categories.

    :   **Returns:**: the range of z values over all timesteps and categories.


---


|  |  |  |  |  |  |  |  |  |  |  |
| --- | --- | --- | --- | --- | --- | --- | --- | --- | --- | --- |
| |  |  |  |  |  |  |  |  | | --- | --- | --- | --- | --- | --- | --- | --- | | **Overview** | **Package** | **Class** | **Use** | **Tree** | **Deprecated** | **Index** | **Help** | | |  |
| **PREV CLASS**   **NEXT CLASS** | **FRAMES**    **NO FRAMES**     **All Classes** |
| SUMMARY: NESTED | FIELD | CONSTR | METHOD | DETAIL: FIELD | CONSTR | METHOD |


---
