# Supplementary material
Source: MDPI journal article supplement (https://www.mdpi.com/2071-1050/2/5/1182)
Supplement: s1 [file s1 › Sustainability_Altaweel_EtAl/Client/docs/anl/aida/bubble/BubblePlot.html]

BubblePlot


---


|  |  |  |  |  |  |  |  |  |  |  |
| --- | --- | --- | --- | --- | --- | --- | --- | --- | --- | --- |
| |  |  |  |  |  |  |  |  | | --- | --- | --- | --- | --- | --- | --- | --- | | **Overview** | **Package** | **Class** | **Use** | **Tree** | **Deprecated** | **Index** | **Help** | | |  |
| **PREV CLASS**   **NEXT CLASS** | **FRAMES**    **NO FRAMES**     **All Classes** |
| SUMMARY: NESTED | FIELD | CONSTR | METHOD | DETAIL: FIELD | CONSTR | METHOD |


---


## anl.aida.bubble Class BubblePlot

```
java.lang.Object
  anl.aida.bubble.BubblePlot
```

---

``` public class BubblePlot extends java.lang.Object ```

---

| **Nested Class Summary** | |
| --- | --- |
| `private static interface` | `BubblePlot.Updater` |


| **Field Summary** | |
| --- | --- |
| `private  BubblePlot.Updater` | `animateUpdate` |
| `private  DefaultBubbleRenderer` | `bubbles` |
| `private  edu.umd.cs.piccolo.PCanvas` | `canvas` |
| `private  int[]` | `catIndices` |
| `private  BubbleDataset` | `data` |
| `private  edu.umd.cs.piccolo.nodes.PText` | `dateNode` |
| `private  AbstractDomainAxis` | `dAxis` |
| `private  boolean` | `ignoreMouseOver` |
| `private  boolean` | `initialized` |
| `private  java.util.List<BubbleSelectionListener>` | `listeners` |
| `private  BubblePlot.Updater` | `offsetUpdate` |
| `private  edu.umd.cs.piccolo.PNode` | `plot` |
| `private  RangeAxis` | `rAxis` |
| `private  int` | `timestep` |
| `private  NumericRange` | `zRange` |


| **Constructor Summary** | |
| --- | --- |
| `BubblePlot(edu.umd.cs.piccolo.PCanvas canvas, BubbleDataset dataset)` |


| **Method Summary** | |
| --- | --- |
| `void` | `addSelectionListener(BubbleSelectionListener listener)`             Adds the specified listener to listen for bubble selection events. |
| `(package private)  edu.umd.cs.piccolo.PCanvas` | `getCanvas()` |
| `AbstractDomainAxis` | `getDomainAxis()`             Gets the domain axis. |
| `(package private)  edu.umd.cs.piccolo.PNode` | `getPlot()` |
| `RangeAxis` | `getRangeAxis()` |
| `private  void` | `init()` |
| `boolean` | `isIgnoreMouseOver()`             Gets whether or not mouse over events on bubbles should be ignored. |
| `private  void` | `layout()` |
| `private  void` | `removeChild(edu.umd.cs.piccolo.PNode node)` |
| `void` | `resetBounds()`             Reset the bounds of the plot to its original extent. |
| `void` | `selectBubble(int categoryIndex, boolean selected)`             Selects or unselects the bubble with the specified category index. |
| `void` | `setDomainAxis(AbstractDomainAxis axis)`             Sets the domain axis. |
| `void` | `setIgnoreMouseOver(boolean ignoreMouseOver)`             Sets whether or not mouse over events on bubbles should be ignored. |
| `void` | `setRangeAxis(RangeAxis axis)` |
| `private  void` | `updateBubbles(BubblePlot.Updater updater)` |
| `private  void` | `updateDateNode(java.lang.String text)` |
| `void` | `updateTimeStep(int timestep, boolean animate)` |
| `void` | `zoom(java.awt.geom.Rectangle2D bounds)`             Zoom to the specified bounds. |

| **Methods inherited from class java.lang.Object** |
| --- |
| `clone, equals, finalize, getClass, hashCode, notify, notifyAll, toString, wait, wait, wait` |

| **Field Detail** |
| --- |

### canvas

```
private edu.umd.cs.piccolo.PCanvas canvas
```

---


### rAxis

```
private RangeAxis rAxis
```

---


### dAxis

```
private AbstractDomainAxis dAxis
```

---


### plot

```
private edu.umd.cs.piccolo.PNode plot
```

---


### bubbles

```
private DefaultBubbleRenderer bubbles
```

---


### data

```
private BubbleDataset data
```

---


### timestep

```
private int timestep
```

---


### catIndices

```
private int[] catIndices
```

---


### zRange

```
private NumericRange zRange
```

---


### dateNode

```
private edu.umd.cs.piccolo.nodes.PText dateNode
```

---


### ignoreMouseOver

```
private boolean ignoreMouseOver
```

---


### initialized

```
private boolean initialized
```

---


### listeners

```
private java.util.List<BubbleSelectionListener> listeners
```

---


### animateUpdate

```
private BubblePlot.Updater animateUpdate
```

---


### offsetUpdate

```
private BubblePlot.Updater offsetUpdate
```


| **Constructor Detail** |
| --- |

### BubblePlot

```
public BubblePlot(edu.umd.cs.piccolo.PCanvas canvas,
                  BubbleDataset dataset)
```


| **Method Detail** |
| --- |

### init

```
private void init()
```

---


### getCanvas

```
edu.umd.cs.piccolo.PCanvas getCanvas()
```

---


### getPlot

```
edu.umd.cs.piccolo.PNode getPlot()
```

---


### isIgnoreMouseOver

```
public boolean isIgnoreMouseOver()
```

:   Gets whether or not mouse over events on bubbles should be ignored.

    :   **Returns:**: whether or not mouse over events on bubbles should be ignored.

---


### setIgnoreMouseOver

```
public void setIgnoreMouseOver(boolean ignoreMouseOver)
```

:   Sets whether or not mouse over events on bubbles should be ignored.

    :   **Parameters:**: `ignoreMouseOver` - the new value

---


### addSelectionListener

```
public void addSelectionListener(BubbleSelectionListener listener)
```

:   Adds the specified listener to listen for bubble selection events.

    :   **Parameters:**: `listener` - the listener to add

---


### selectBubble

```
public void selectBubble(int categoryIndex,
                         boolean selected)
```

:   Selects or unselects the bubble with the specified category index.

    :   **Parameters:**: `categoryIndex` - in the index of the bubble: `selected` - whether or not the bubble is selected or unselected.

---


### updateTimeStep

```
public void updateTimeStep(int timestep,
                           boolean animate)
```

---


### updateDateNode

```
private void updateDateNode(java.lang.String text)
```

---


### updateBubbles

```
private void updateBubbles(BubblePlot.Updater updater)
```

---


### getRangeAxis

```
public RangeAxis getRangeAxis()
```

:   **Returns:**: the rAxis

---


### setRangeAxis

```
public void setRangeAxis(RangeAxis axis)
```

:   **Parameters:**: `axis` - the rAxis to set

---


### getDomainAxis

```
public AbstractDomainAxis getDomainAxis()
```

:   Gets the domain axis.

    :   **Returns:**: the dAxis

---


### setDomainAxis

```
public void setDomainAxis(AbstractDomainAxis axis)
```

:   Sets the domain axis.

    :   **Parameters:**: `axis` - the dAxis to set

---


### removeChild

```
private void removeChild(edu.umd.cs.piccolo.PNode node)
```

---


### zoom

```
public void zoom(java.awt.geom.Rectangle2D bounds)
```

:   Zoom to the specified bounds. The bounds are in camera coordinates.

    :   **Parameters:**: `bounds` - the bounds to zoom to

---


### resetBounds

```
public void resetBounds()
```

:   Reset the bounds of the plot to its original extent.

---


### layout

```
private void layout()
```


---


|  |  |  |  |  |  |  |  |  |  |  |
| --- | --- | --- | --- | --- | --- | --- | --- | --- | --- | --- |
| |  |  |  |  |  |  |  |  | | --- | --- | --- | --- | --- | --- | --- | --- | | **Overview** | **Package** | **Class** | **Use** | **Tree** | **Deprecated** | **Index** | **Help** | | |  |
| **PREV CLASS**   **NEXT CLASS** | **FRAMES**    **NO FRAMES**     **All Classes** |
| SUMMARY: NESTED | FIELD | CONSTR | METHOD | DETAIL: FIELD | CONSTR | METHOD |


---
