# Supplementary material
Source: MDPI journal article supplement (https://www.mdpi.com/2071-1050/2/5/1182)
Supplement: s1 [file s1 › Sustainability_Altaweel_EtAl/Client/docs/anl/aida/bubble/BubblePlotCreator.html]

BubblePlotCreator


---


|  |  |  |  |  |  |  |  |  |  |  |
| --- | --- | --- | --- | --- | --- | --- | --- | --- | --- | --- |
| |  |  |  |  |  |  |  |  | | --- | --- | --- | --- | --- | --- | --- | --- | | **Overview** | **Package** | **Class** | **Use** | **Tree** | **Deprecated** | **Index** | **Help** | | |  |
| **PREV CLASS**   **NEXT CLASS** | **FRAMES**    **NO FRAMES**     **All Classes** |
| SUMMARY: NESTED | FIELD | CONSTR | METHOD | DETAIL: FIELD | CONSTR | METHOD |


---


## anl.aida.bubble Class BubblePlotCreator

```
java.lang.Object
  javax.swing.SwingWorker<BubbleDataset,java.lang.Object>
      anl.aida.bubble.BubblePlotCreator
```

**All Implemented Interfaces:**: java.lang.Runnable, java.util.concurrent.Future<BubbleDataset>, java.util.concurrent.RunnableFuture<BubbleDataset>

---

``` public class BubblePlotCreator extends javax.swing.SwingWorker<BubbleDataset,java.lang.Object> ```

---

| **Nested Class Summary** | |
| --- | --- |

| **Nested classes/interfaces inherited from class javax.swing.SwingWorker** |
| --- |
| `javax.swing.SwingWorker.StateValue` |


| **Field Summary** | |
| --- | --- |
| `private  BubbleConfigBean` | `bean` |
| `private static simphony.util.messages.MessageCenter` | `center` |
| `private  AIDAGui` | `gui` |
| `private  anl.aida.data.DataManager` | `manager` |
| `private  javax.swing.JPanel` | `panel` |


| **Constructor Summary** | |
| --- | --- |
| `BubblePlotCreator(BubbleConfigBean bean, javax.swing.JPanel panel, AIDAGui gui, anl.aida.data.DataManager manager)` |


| **Method Summary** | |
| --- | --- |
| `protected  BubbleDataset` | `doInBackground()` |
| `protected  void` | `done()` |
| `private  anl.aida.data.DataFrame` | `evaluateFormula(FormulaListElement item)` |

| **Methods inherited from class javax.swing.SwingWorker** |
| --- |
| `addPropertyChangeListener, cancel, execute, firePropertyChange, get, get, getProgress, getPropertyChangeSupport, getState, isCancelled, isDone, process, publish, removePropertyChangeListener, run, setProgress` |

| **Methods inherited from class java.lang.Object** |
| --- |
| `clone, equals, finalize, getClass, hashCode, notify, notifyAll, toString, wait, wait, wait` |

| **Field Detail** |
| --- |

### center

```
private static simphony.util.messages.MessageCenter center
```

---


### panel

```
private javax.swing.JPanel panel
```

---


### gui

```
private AIDAGui gui
```

---


### bean

```
private BubbleConfigBean bean
```

---


### manager

```
private anl.aida.data.DataManager manager
```


| **Constructor Detail** |
| --- |

### BubblePlotCreator

```
public BubblePlotCreator(BubbleConfigBean bean,
                         javax.swing.JPanel panel,
                         AIDAGui gui,
                         anl.aida.data.DataManager manager)
```


| **Method Detail** |
| --- |

### evaluateFormula

```
private anl.aida.data.DataFrame evaluateFormula(FormulaListElement item)
                                         throws anl.aida.formula.IllegalFormulaException
```

:   **Throws:**: `anl.aida.formula.IllegalFormulaException`

---


### doInBackground

```
protected BubbleDataset doInBackground()
                                throws java.lang.Exception
```

:   **Specified by:**: `doInBackground` in class `javax.swing.SwingWorker<BubbleDataset,java.lang.Object>`
:   **Throws:**: `java.lang.Exception`

---


### done

```
protected void done()
```

:   **Overrides:**: `done` in class `javax.swing.SwingWorker<BubbleDataset,java.lang.Object>`


---


|  |  |  |  |  |  |  |  |  |  |  |
| --- | --- | --- | --- | --- | --- | --- | --- | --- | --- | --- |
| |  |  |  |  |  |  |  |  | | --- | --- | --- | --- | --- | --- | --- | --- | | **Overview** | **Package** | **Class** | **Use** | **Tree** | **Deprecated** | **Index** | **Help** | | |  |
| **PREV CLASS**   **NEXT CLASS** | **FRAMES**    **NO FRAMES**     **All Classes** |
| SUMMARY: NESTED | FIELD | CONSTR | METHOD | DETAIL: FIELD | CONSTR | METHOD |


---
