# Supplementary material
Source: MDPI journal article supplement (https://www.mdpi.com/2071-1050/2/5/1182)
Supplement: s1 [file s1 › Sustainability_Altaweel_EtAl/Client/docs/anl/aida/bubble/BubbleSelectionListener.html]

BubbleSelectionListener


---


|  |  |  |  |  |  |  |  |  |  |  |
| --- | --- | --- | --- | --- | --- | --- | --- | --- | --- | --- |
| |  |  |  |  |  |  |  |  | | --- | --- | --- | --- | --- | --- | --- | --- | | **Overview** | **Package** | **Class** | **Use** | **Tree** | **Deprecated** | **Index** | **Help** | | |  |
| **PREV CLASS**   **NEXT CLASS** | **FRAMES**    **NO FRAMES**     **All Classes** |
| SUMMARY: NESTED | FIELD | CONSTR | METHOD | DETAIL: FIELD | CONSTR | METHOD |


---


## anl.aida.bubble Interface BubbleSelectionListener

---

``` public interface BubbleSelectionListener ```

Interface for classes that want to listen for bubble
selection events.

---

| **Method Summary** | |
| --- | --- |
| `void` | `bubbleSelected(int categoryIndex)`             Called when a bubble is selected. |
| `void` | `bubbleUnselected(int categoryIndex)`             Called when a bubble is unselected. |

| **Method Detail** |
| --- |

### bubbleSelected

```
void bubbleSelected(int categoryIndex)
```

:   Called when a bubble is selected.

    :   **Parameters:**: `categoryIndex` - the index of the category.

---


### bubbleUnselected

```
void bubbleUnselected(int categoryIndex)
```

:   Called when a bubble is unselected.

    :   **Parameters:**: `categoryIndex` - the index of the category.


---


|  |  |  |  |  |  |  |  |  |  |  |
| --- | --- | --- | --- | --- | --- | --- | --- | --- | --- | --- |
| |  |  |  |  |  |  |  |  | | --- | --- | --- | --- | --- | --- | --- | --- | | **Overview** | **Package** | **Class** | **Use** | **Tree** | **Deprecated** | **Index** | **Help** | | |  |
| **PREV CLASS**   **NEXT CLASS** | **FRAMES**    **NO FRAMES**     **All Classes** |
| SUMMARY: NESTED | FIELD | CONSTR | METHOD | DETAIL: FIELD | CONSTR | METHOD |


---
