# Supplementary material
Source: MDPI journal article supplement (https://www.mdpi.com/2071-1050/2/5/1182)
Supplement: s1 [file s1 › Sustainability_Altaweel_EtAl/Client/docs/anl/aida/bubble/BubbleSlider.html]

BubbleSlider


---


|  |  |  |  |  |  |  |  |  |  |  |
| --- | --- | --- | --- | --- | --- | --- | --- | --- | --- | --- |
| |  |  |  |  |  |  |  |  | | --- | --- | --- | --- | --- | --- | --- | --- | | **Overview** | **Package** | **Class** | **Use** | **Tree** | **Deprecated** | **Index** | **Help** | | |  |
| **PREV CLASS**   **NEXT CLASS** | **FRAMES**    **NO FRAMES**     **All Classes** |
| SUMMARY: NESTED | FIELD | CONSTR | METHOD | DETAIL: FIELD | CONSTR | METHOD |


---


## anl.aida.bubble Class BubbleSlider

```
java.lang.Object
  anl.aida.bubble.BubbleSlider
```

---

``` public class BubbleSlider extends java.lang.Object ```

**Author:**
:   User #1

---

| **Field Summary** | |
| --- | --- |
| `private  boolean` | `animate` |
| `private  boolean` | `fireSliderChange` |
| `(package private)  javax.swing.Action` | `playAction` |
| `private  javax.swing.JButton` | `playBtn` |
| `private  javax.swing.Icon` | `playIcon` |
| `private  BubblePlot` | `plot` |
| `private  javax.swing.Icon` | `stopIcon` |
| `private  javax.swing.Timer` | `timer` |
| `private  javax.swing.JSlider` | `timeSlider` |
| `private  int` | `timestep` |
| `private  int` | `tsCount` |


| **Constructor Summary** | |
| --- | --- |
| `BubbleSlider()` |
| `BubbleSlider(BubbleDataset data, BubblePlot plot)` |


| **Method Summary** | |
| --- | --- |
| `javax.swing.JButton` | `getPlayButton()` |
| `javax.swing.JSlider` | `getTimeSlider()` |
| `int` | `getTimestep()` |
| `private  void` | `initListeners()` |
| `void` | `setTimestep(int timestep)` |
| `private  void` | `startTimer()` |
| `private  void` | `stopTimer()` |

| **Methods inherited from class java.lang.Object** |
| --- |
| `clone, equals, finalize, getClass, hashCode, notify, notifyAll, toString, wait, wait, wait` |

| **Field Detail** |
| --- |

### tsCount

```
private int tsCount
```

---


### plot

```
private BubblePlot plot
```

---


### fireSliderChange

```
private boolean fireSliderChange
```

---


### timestep

```
private int timestep
```

---


### timer

```
private javax.swing.Timer timer
```

---


### animate

```
private boolean animate
```

---


### playBtn

```
private javax.swing.JButton playBtn
```

---


### timeSlider

```
private javax.swing.JSlider timeSlider
```

---


### playIcon

```
private javax.swing.Icon playIcon
```

---


### stopIcon

```
private javax.swing.Icon stopIcon
```

---


### playAction

```
javax.swing.Action playAction
```


| **Constructor Detail** |
| --- |

### BubbleSlider

```
public BubbleSlider()
```

---


### BubbleSlider

```
public BubbleSlider(BubbleDataset data,
                    BubblePlot plot)
```


| **Method Detail** |
| --- |

### getPlayButton

```
public javax.swing.JButton getPlayButton()
```

---


### getTimeSlider

```
public javax.swing.JSlider getTimeSlider()
```

---


### getTimestep

```
public int getTimestep()
```

---


### setTimestep

```
public void setTimestep(int timestep)
```

---


### initListeners

```
private void initListeners()
```

---


### stopTimer

```
private void stopTimer()
```

---


### startTimer

```
private void startTimer()
```


---


|  |  |  |  |  |  |  |  |  |  |  |
| --- | --- | --- | --- | --- | --- | --- | --- | --- | --- | --- |
| |  |  |  |  |  |  |  |  | | --- | --- | --- | --- | --- | --- | --- | --- | | **Overview** | **Package** | **Class** | **Use** | **Tree** | **Deprecated** | **Index** | **Help** | | |  |
| **PREV CLASS**   **NEXT CLASS** | **FRAMES**    **NO FRAMES**     **All Classes** |
| SUMMARY: NESTED | FIELD | CONSTR | METHOD | DETAIL: FIELD | CONSTR | METHOD |


---
