# Supplementary material
Source: MDPI journal article supplement (https://www.mdpi.com/2071-1050/2/5/1182)
Supplement: s1 [file s1 › Sustainability_Altaweel_EtAl/Client/docs/anl/aida/bubble/BubbleTooltip.html]

BubbleTooltip


---


|  |  |  |  |  |  |  |  |  |  |  |
| --- | --- | --- | --- | --- | --- | --- | --- | --- | --- | --- |
| |  |  |  |  |  |  |  |  | | --- | --- | --- | --- | --- | --- | --- | --- | | **Overview** | **Package** | **Class** | **Use** | **Tree** | **Deprecated** | **Index** | **Help** | | |  |
| **PREV CLASS**   **NEXT CLASS** | **FRAMES**    **NO FRAMES**     **All Classes** |
| SUMMARY: NESTED | FIELD | CONSTR | METHOD | DETAIL: FIELD | CONSTR | METHOD |


---


## anl.aida.bubble Class BubbleTooltip

```
java.lang.Object
  edu.umd.cs.piccolo.event.PBasicInputEventHandler
      anl.aida.bubble.BubbleTooltip
```

**All Implemented Interfaces:**: edu.umd.cs.piccolo.event.PInputEventListener, java.util.EventListener

---

``` public class BubbleTooltip extends edu.umd.cs.piccolo.event.PBasicInputEventHandler ```

---

| **Field Summary** | |
| --- | --- |
| `private  Bubble` | `bubble` |
| `private  BubblePlot` | `plot` |


| **Constructor Summary** | |
| --- | --- |
| `BubbleTooltip(BubblePlot plot)` |


| **Method Summary** | |
| --- | --- |
| `void` | `mouseClicked(edu.umd.cs.piccolo.event.PInputEvent event)` |
| `void` | `mouseEntered(edu.umd.cs.piccolo.event.PInputEvent event)` |
| `void` | `mouseExited(edu.umd.cs.piccolo.event.PInputEvent event)` |

| **Methods inherited from class edu.umd.cs.piccolo.event.PBasicInputEventHandler** |
| --- |
| `acceptsEvent, getEventFilter, keyboardFocusGained, keyboardFocusLost, keyPressed, keyReleased, keyTyped, mouseDragged, mouseMoved, mousePressed, mouseReleased, mouseWheelRotated, mouseWheelRotatedByBlock, paramString, processEvent, setEventFilter, toString` |

| **Methods inherited from class java.lang.Object** |
| --- |
| `clone, equals, finalize, getClass, hashCode, notify, notifyAll, wait, wait, wait` |

| **Field Detail** |
| --- |

### bubble

```
private Bubble bubble
```

---


### plot

```
private BubblePlot plot
```


| **Constructor Detail** |
| --- |

### BubbleTooltip

```
public BubbleTooltip(BubblePlot plot)
```

**Parameters:**: `domainAxis` -: `rangeAxis` -


| **Method Detail** |
| --- |

### mouseClicked

```
public void mouseClicked(edu.umd.cs.piccolo.event.PInputEvent event)
```

:   **Overrides:**: `mouseClicked` in class `edu.umd.cs.piccolo.event.PBasicInputEventHandler`

---


### mouseEntered

```
public void mouseEntered(edu.umd.cs.piccolo.event.PInputEvent event)
```

:   **Overrides:**: `mouseEntered` in class `edu.umd.cs.piccolo.event.PBasicInputEventHandler`

---


### mouseExited

```
public void mouseExited(edu.umd.cs.piccolo.event.PInputEvent event)
```

:   **Overrides:**: `mouseExited` in class `edu.umd.cs.piccolo.event.PBasicInputEventHandler`


---


|  |  |  |  |  |  |  |  |  |  |  |
| --- | --- | --- | --- | --- | --- | --- | --- | --- | --- | --- |
| |  |  |  |  |  |  |  |  | | --- | --- | --- | --- | --- | --- | --- | --- | | **Overview** | **Package** | **Class** | **Use** | **Tree** | **Deprecated** | **Index** | **Help** | | |  |
| **PREV CLASS**   **NEXT CLASS** | **FRAMES**    **NO FRAMES**     **All Classes** |
| SUMMARY: NESTED | FIELD | CONSTR | METHOD | DETAIL: FIELD | CONSTR | METHOD |


---
