# Supplementary material
Source: MDPI journal article supplement (https://www.mdpi.com/2071-1050/2/5/1182)
Supplement: s1 [file s1 › Sustainability_Altaweel_EtAl/Client/docs/anl/aida/bubble/class-use/AbstractAxis.html]

Uses of Class anl.aida.bubble.AbstractAxis


---


|  |  |  |  |  |  |  |  |  |  |  |
| --- | --- | --- | --- | --- | --- | --- | --- | --- | --- | --- |
| |  |  |  |  |  |  |  |  | | --- | --- | --- | --- | --- | --- | --- | --- | | **Overview** | **Package** | **Class** | **Use** | **Tree** | **Deprecated** | **Index** | **Help** | | |  |
| PREV   NEXT | **FRAMES**    **NO FRAMES**     **All Classes** |


---


## **Uses of Class anl.aida.bubble.AbstractAxis**

| Packages that use AbstractAxis | |
| --- | --- |
| **anl.aida.bubble** |  |

| Uses of AbstractAxis in anl.aida.bubble | |
| --- | --- |

| Subclasses of AbstractAxis in anl.aida.bubble | |
| --- | --- |
| `class` | `AbstractDomainAxis`             Abstract implementation of a Domain Axis. |
| `class` | `DomainAxis` |
| `class` | `LogDomainAxis`             Domain Axis with logarithmic scale. |
| `class` | `RangeAxis` |

---


|  |  |  |  |  |  |  |  |  |  |  |
| --- | --- | --- | --- | --- | --- | --- | --- | --- | --- | --- |
| |  |  |  |  |  |  |  |  | | --- | --- | --- | --- | --- | --- | --- | --- | | **Overview** | **Package** | **Class** | **Use** | **Tree** | **Deprecated** | **Index** | **Help** | | |  |
| PREV   NEXT | **FRAMES**    **NO FRAMES**     **All Classes** |


---
