# Supplementary material
Source: MDPI journal article supplement (https://www.mdpi.com/2071-1050/2/5/1182)
Supplement: s1 [file s1 › Sustainability_Altaweel_EtAl/Client/docs/anl/aida/bubble/class-use/AbstractDomainAxis.html]

Uses of Class anl.aida.bubble.AbstractDomainAxis


---


|  |  |  |  |  |  |  |  |  |  |  |
| --- | --- | --- | --- | --- | --- | --- | --- | --- | --- | --- |
| |  |  |  |  |  |  |  |  | | --- | --- | --- | --- | --- | --- | --- | --- | | **Overview** | **Package** | **Class** | **Use** | **Tree** | **Deprecated** | **Index** | **Help** | | |  |
| PREV   NEXT | **FRAMES**    **NO FRAMES**     **All Classes** |


---


## **Uses of Class anl.aida.bubble.AbstractDomainAxis**

| Packages that use AbstractDomainAxis | |
| --- | --- |
| **anl.aida.bubble** |  |

| Uses of AbstractDomainAxis in anl.aida.bubble | |
| --- | --- |

| Subclasses of AbstractDomainAxis in anl.aida.bubble | |
| --- | --- |
| `class` | `DomainAxis` |
| `class` | `LogDomainAxis`             Domain Axis with logarithmic scale. |

| Fields in anl.aida.bubble declared as AbstractDomainAxis | |
| --- | --- |
| `private  AbstractDomainAxis` | `BubblePlot.dAxis` |

| Methods in anl.aida.bubble that return AbstractDomainAxis | |
| --- | --- |
| `AbstractDomainAxis` | `BubblePlot.getDomainAxis()`             Gets the domain axis. |

| Methods in anl.aida.bubble with parameters of type AbstractDomainAxis | |
| --- | --- |
| `void` | `BubblePlot.setDomainAxis(AbstractDomainAxis axis)`             Sets the domain axis. |

---


|  |  |  |  |  |  |  |  |  |  |  |
| --- | --- | --- | --- | --- | --- | --- | --- | --- | --- | --- |
| |  |  |  |  |  |  |  |  | | --- | --- | --- | --- | --- | --- | --- | --- | | **Overview** | **Package** | **Class** | **Use** | **Tree** | **Deprecated** | **Index** | **Help** | | |  |
| PREV   NEXT | **FRAMES**    **NO FRAMES**     **All Classes** |


---
