# Supplementary material
Source: MDPI journal article supplement (https://www.mdpi.com/2071-1050/2/5/1182)
Supplement: s1 [file s1 › Sustainability_Altaweel_EtAl/Client/docs/anl/aida/bubble/class-use/Bubble.html]

Uses of Class anl.aida.bubble.Bubble


---


|  |  |  |  |  |  |  |  |  |  |  |
| --- | --- | --- | --- | --- | --- | --- | --- | --- | --- | --- |
| |  |  |  |  |  |  |  |  | | --- | --- | --- | --- | --- | --- | --- | --- | | **Overview** | **Package** | **Class** | **Use** | **Tree** | **Deprecated** | **Index** | **Help** | | |  |
| PREV   NEXT | **FRAMES**    **NO FRAMES**     **All Classes** |


---


## **Uses of Class anl.aida.bubble.Bubble**

| Packages that use Bubble | |
| --- | --- |
| **anl.aida.bubble** |  |

| Uses of Bubble in anl.aida.bubble | |
| --- | --- |

| Fields in anl.aida.bubble declared as Bubble | |
| --- | --- |
| `private  Bubble` | `BubbleTooltip.bubble` |

| Fields in anl.aida.bubble with type parameters of type Bubble | |
| --- | --- |
| `private  java.util.Map<java.lang.Integer,Bubble>` | `DefaultBubbleRenderer.bubbles` |

---


|  |  |  |  |  |  |  |  |  |  |  |
| --- | --- | --- | --- | --- | --- | --- | --- | --- | --- | --- |
| |  |  |  |  |  |  |  |  | | --- | --- | --- | --- | --- | --- | --- | --- | | **Overview** | **Package** | **Class** | **Use** | **Tree** | **Deprecated** | **Index** | **Help** | | |  |
| PREV   NEXT | **FRAMES**    **NO FRAMES**     **All Classes** |


---
