# Supplementary material
Source: MDPI journal article supplement (https://www.mdpi.com/2071-1050/2/5/1182)
Supplement: s1 [file s1 › Sustainability_Altaweel_EtAl/Client/docs/anl/aida/bubble/class-use/Bubble.State.html]

Uses of Class anl.aida.bubble.Bubble.State


---


|  |  |  |  |  |  |  |  |  |  |  |
| --- | --- | --- | --- | --- | --- | --- | --- | --- | --- | --- |
| |  |  |  |  |  |  |  |  | | --- | --- | --- | --- | --- | --- | --- | --- | | **Overview** | **Package** | **Class** | **Use** | **Tree** | **Deprecated** | **Index** | **Help** | | |  |
| PREV   NEXT | **FRAMES**    **NO FRAMES**     **All Classes** |


---


## **Uses of Class anl.aida.bubble.Bubble.State**

| Packages that use Bubble.State | |
| --- | --- |
| **anl.aida.bubble** |  |

| Uses of Bubble.State in anl.aida.bubble | |
| --- | --- |

| Fields in anl.aida.bubble declared as Bubble.State | |
| --- | --- |
| `private  Bubble.State` | `Bubble.state` |

| Methods in anl.aida.bubble that return Bubble.State | |
| --- | --- |
| `Bubble.State` | `Bubble.getState()` |
| `static Bubble.State` | `Bubble.State.valueOf(java.lang.String name)`             Returns the enum constant of this type with the specified name. |
| `static Bubble.State[]` | `Bubble.State.values()`             Returns an array containing the constants of this enum type, in the order they are declared. |

| Methods in anl.aida.bubble with parameters of type Bubble.State | |
| --- | --- |
| `void` | `Bubble.setState(Bubble.State state)` |

---


|  |  |  |  |  |  |  |  |  |  |  |
| --- | --- | --- | --- | --- | --- | --- | --- | --- | --- | --- |
| |  |  |  |  |  |  |  |  | | --- | --- | --- | --- | --- | --- | --- | --- | | **Overview** | **Package** | **Class** | **Use** | **Tree** | **Deprecated** | **Index** | **Help** | | |  |
| PREV   NEXT | **FRAMES**    **NO FRAMES**     **All Classes** |


---
