# Supplementary material
Source: MDPI journal article supplement (https://www.mdpi.com/2071-1050/2/5/1182)
Supplement: s1 [file s1 › Sustainability_Altaweel_EtAl/Client/docs/anl/aida/bubble/class-use/BubbleChart.Category.html]

Uses of Class anl.aida.bubble.BubbleChart.Category


---


|  |  |  |  |  |  |  |  |  |  |  |
| --- | --- | --- | --- | --- | --- | --- | --- | --- | --- | --- |
| |  |  |  |  |  |  |  |  | | --- | --- | --- | --- | --- | --- | --- | --- | | **Overview** | **Package** | **Class** | **Use** | **Tree** | **Deprecated** | **Index** | **Help** | | |  |
| PREV   NEXT | **FRAMES**    **NO FRAMES**     **All Classes** |


---


## **Uses of Class anl.aida.bubble.BubbleChart.Category**

| Packages that use BubbleChart.Category | |
| --- | --- |
| **anl.aida.bubble** |  |

| Uses of BubbleChart.Category in anl.aida.bubble | |
| --- | --- |

| Fields in anl.aida.bubble with type parameters of type BubbleChart.Category | |
| --- | --- |
| `private  java.util.Set<BubbleChart.Category>` | `BubbleChart.selections` |

| Methods in anl.aida.bubble with parameters of type BubbleChart.Category | |
| --- | --- |
| `int` | `BubbleChart.CategoryComparator.compare(BubbleChart.Category o1, BubbleChart.Category o2)` |

---


|  |  |  |  |  |  |  |  |  |  |  |
| --- | --- | --- | --- | --- | --- | --- | --- | --- | --- | --- |
| |  |  |  |  |  |  |  |  | | --- | --- | --- | --- | --- | --- | --- | --- | | **Overview** | **Package** | **Class** | **Use** | **Tree** | **Deprecated** | **Index** | **Help** | | |  |
| PREV   NEXT | **FRAMES**    **NO FRAMES**     **All Classes** |


---
