# Supplementary material
Source: MDPI journal article supplement (https://www.mdpi.com/2071-1050/2/5/1182)
Supplement: s1 [file s1 › Sustainability_Altaweel_EtAl/Client/docs/anl/aida/bubble/class-use/BubbleDataset.html]

Uses of Interface anl.aida.bubble.BubbleDataset


---


|  |  |  |  |  |  |  |  |  |  |  |
| --- | --- | --- | --- | --- | --- | --- | --- | --- | --- | --- |
| |  |  |  |  |  |  |  |  | | --- | --- | --- | --- | --- | --- | --- | --- | | **Overview** | **Package** | **Class** | **Use** | **Tree** | **Deprecated** | **Index** | **Help** | | |  |
| PREV   NEXT | **FRAMES**    **NO FRAMES**     **All Classes** |


---


## **Uses of Interface anl.aida.bubble.BubbleDataset**

| Packages that use BubbleDataset | |
| --- | --- |
| **anl.aida.bubble** |  |
| **anl.aida.plot** |  |

| Uses of BubbleDataset in anl.aida.bubble | |
| --- | --- |

| Classes in anl.aida.bubble that implement BubbleDataset | |
| --- | --- |
| `class` | `DefaultBubbleDataset`             Default implementation of a BubbleDataset that adapts DataFrames to the BubbleDataset interface. |

| Fields in anl.aida.bubble declared as BubbleDataset | |
| --- | --- |
| `private  BubbleDataset` | `BubblePlot.data` |
| `private  BubbleDataset` | `BubbleChart.data` |

| Methods in anl.aida.bubble that return BubbleDataset | |
| --- | --- |
| `protected  BubbleDataset` | `BubblePlotCreator.doInBackground()` |

| Constructors in anl.aida.bubble with parameters of type BubbleDataset | |
| --- | --- |
| `BubbleChart(BubbleDataset data)` |
| `BubblePlot(edu.umd.cs.piccolo.PCanvas canvas, BubbleDataset dataset)` |
| `BubbleSlider(BubbleDataset data, BubblePlot plot)` |
| `DefaultBubbleRenderer(BubbleDataset dataset, BubbleTooltip tooltip)` |

| Uses of BubbleDataset in anl.aida.plot | |
| --- | --- |

| Classes in anl.aida.plot that implement BubbleDataset | |
| --- | --- |
| `(package private)  class` | `BubbleExperiments.Data` |

---


|  |  |  |  |  |  |  |  |  |  |  |
| --- | --- | --- | --- | --- | --- | --- | --- | --- | --- | --- |
| |  |  |  |  |  |  |  |  | | --- | --- | --- | --- | --- | --- | --- | --- | | **Overview** | **Package** | **Class** | **Use** | **Tree** | **Deprecated** | **Index** | **Help** | | |  |
| PREV   NEXT | **FRAMES**    **NO FRAMES**     **All Classes** |


---
