# Supplementary material
Source: MDPI journal article supplement (https://www.mdpi.com/2071-1050/2/5/1182)
Supplement: s1 [file s1 › Sustainability_Altaweel_EtAl/Client/docs/anl/aida/bubble/class-use/BubblePlot.Updater.html]

Uses of Interface anl.aida.bubble.BubblePlot.Updater


---


|  |  |  |  |  |  |  |  |  |  |  |
| --- | --- | --- | --- | --- | --- | --- | --- | --- | --- | --- |
| |  |  |  |  |  |  |  |  | | --- | --- | --- | --- | --- | --- | --- | --- | | **Overview** | **Package** | **Class** | **Use** | **Tree** | **Deprecated** | **Index** | **Help** | | |  |
| PREV   NEXT | **FRAMES**    **NO FRAMES**     **All Classes** |


---


## **Uses of Interface anl.aida.bubble.BubblePlot.Updater**

| Packages that use BubblePlot.Updater | |
| --- | --- |
| **anl.aida.bubble** |  |

| Uses of BubblePlot.Updater in anl.aida.bubble | |
| --- | --- |

| Fields in anl.aida.bubble declared as BubblePlot.Updater | |
| --- | --- |
| `private  BubblePlot.Updater` | `BubblePlot.animateUpdate` |
| `private  BubblePlot.Updater` | `BubblePlot.offsetUpdate` |

| Methods in anl.aida.bubble with parameters of type BubblePlot.Updater | |
| --- | --- |
| `private  void` | `BubblePlot.updateBubbles(BubblePlot.Updater updater)` |

---


|  |  |  |  |  |  |  |  |  |  |  |
| --- | --- | --- | --- | --- | --- | --- | --- | --- | --- | --- |
| |  |  |  |  |  |  |  |  | | --- | --- | --- | --- | --- | --- | --- | --- | | **Overview** | **Package** | **Class** | **Use** | **Tree** | **Deprecated** | **Index** | **Help** | | |  |
| PREV   NEXT | **FRAMES**    **NO FRAMES**     **All Classes** |


---
