# Supplementary material
Source: MDPI journal article supplement (https://www.mdpi.com/2071-1050/2/5/1182)
Supplement: s1 [file s1 › Sustainability_Altaweel_EtAl/Client/docs/anl/aida/bubble/class-use/BubbleSelectionListener.html]

Uses of Interface anl.aida.bubble.BubbleSelectionListener


---


|  |  |  |  |  |  |  |  |  |  |  |
| --- | --- | --- | --- | --- | --- | --- | --- | --- | --- | --- |
| |  |  |  |  |  |  |  |  | | --- | --- | --- | --- | --- | --- | --- | --- | | **Overview** | **Package** | **Class** | **Use** | **Tree** | **Deprecated** | **Index** | **Help** | | |  |
| PREV   NEXT | **FRAMES**    **NO FRAMES**     **All Classes** |


---


## **Uses of Interface anl.aida.bubble.BubbleSelectionListener**

| Packages that use BubbleSelectionListener | |
| --- | --- |
| **anl.aida.bubble** |  |

| Uses of BubbleSelectionListener in anl.aida.bubble | |
| --- | --- |

| Fields in anl.aida.bubble with type parameters of type BubbleSelectionListener | |
| --- | --- |
| `private  java.util.List<BubbleSelectionListener>` | `BubblePlot.listeners` |

| Methods in anl.aida.bubble with parameters of type BubbleSelectionListener | |
| --- | --- |
| `void` | `BubblePlot.addSelectionListener(BubbleSelectionListener listener)`             Adds the specified listener to listen for bubble selection events. |

---


|  |  |  |  |  |  |  |  |  |  |  |
| --- | --- | --- | --- | --- | --- | --- | --- | --- | --- | --- |
| |  |  |  |  |  |  |  |  | | --- | --- | --- | --- | --- | --- | --- | --- | | **Overview** | **Package** | **Class** | **Use** | **Tree** | **Deprecated** | **Index** | **Help** | | |  |
| PREV   NEXT | **FRAMES**    **NO FRAMES**     **All Classes** |


---
