# Supplementary material
Source: MDPI journal article supplement (https://www.mdpi.com/2071-1050/2/5/1182)
Supplement: s1 [file s1 › Sustainability_Altaweel_EtAl/Client/docs/anl/aida/bubble/class-use/NumericRange.html]

Uses of Class anl.aida.bubble.NumericRange


---


|  |  |  |  |  |  |  |  |  |  |  |
| --- | --- | --- | --- | --- | --- | --- | --- | --- | --- | --- |
| |  |  |  |  |  |  |  |  | | --- | --- | --- | --- | --- | --- | --- | --- | | **Overview** | **Package** | **Class** | **Use** | **Tree** | **Deprecated** | **Index** | **Help** | | |  |
| PREV   NEXT | **FRAMES**    **NO FRAMES**     **All Classes** |


---


## **Uses of Class anl.aida.bubble.NumericRange**

| Packages that use NumericRange | |
| --- | --- |
| **anl.aida.bubble** |  |
| **anl.aida.plot** |  |

| Uses of NumericRange in anl.aida.bubble | |
| --- | --- |

| Fields in anl.aida.bubble declared as NumericRange | |
| --- | --- |
| `protected  NumericRange` | `AbstractAxis.origRange` |
| `protected  NumericRange` | `AbstractAxis.range` |
| `private  NumericRange` | `DefaultBubbleDataset.xRange` |
| `private  NumericRange` | `DefaultBubbleDataset.yRange` |
| `private  NumericRange` | `DefaultBubbleDataset.zRange` |
| `private  NumericRange` | `BubblePlot.zRange` |

| Methods in anl.aida.bubble that return NumericRange | |
| --- | --- |
| `NumericRange` | `DefaultBubbleDataset.getXRange()` |
| `NumericRange` | `BubbleDataset.getXRange()`             Gets the range of x values over all timesteps and categories. |
| `NumericRange` | `DefaultBubbleDataset.getYRange()` |
| `NumericRange` | `BubbleDataset.getYRange()`             Gets the range of y values over all timesteps and categories. |
| `NumericRange` | `DefaultBubbleDataset.getZRange()` |
| `NumericRange` | `BubbleDataset.getZRange()`             Gets the range of z values over all timesteps and categories. |

| Methods in anl.aida.bubble with parameters of type NumericRange | |
| --- | --- |
| `void` | `AbstractAxis.zoomTo(NumericRange range)`             Zooms the axis such that it shows the specified range. |

| Constructors in anl.aida.bubble with parameters of type NumericRange | |
| --- | --- |
| `AbstractAxis(NumericRange range, java.lang.String label)` |
| `AbstractDomainAxis(NumericRange range, java.lang.String label)` |
| `DomainAxis(NumericRange range, java.lang.String label)` |
| `LogDomainAxis(NumericRange range, java.lang.String label)` |
| `NumericRange(NumericRange range)` |
| `RangeAxis(NumericRange range, java.lang.String label)` |
| `TickLocator(NumericRange nRange, int numTicks)` |

| Uses of NumericRange in anl.aida.plot | |
| --- | --- |

| Methods in anl.aida.plot that return NumericRange | |
| --- | --- |
| `NumericRange` | `BubbleExperiments.Data.getXRange()` |
| `NumericRange` | `BubbleExperiments.Data.getYRange()` |
| `NumericRange` | `BubbleExperiments.Data.getZRange()` |

---


|  |  |  |  |  |  |  |  |  |  |  |
| --- | --- | --- | --- | --- | --- | --- | --- | --- | --- | --- |
| |  |  |  |  |  |  |  |  | | --- | --- | --- | --- | --- | --- | --- | --- | | **Overview** | **Package** | **Class** | **Use** | **Tree** | **Deprecated** | **Index** | **Help** | | |  |
| PREV   NEXT | **FRAMES**    **NO FRAMES**     **All Classes** |


---
