# Supplementary material
Source: MDPI journal article supplement (https://www.mdpi.com/2071-1050/2/5/1182)
Supplement: s1 [file s1 › Sustainability_Altaweel_EtAl/Client/docs/anl/aida/bubble/DefaultBubbleDataset.CategoryEntry.html]

DefaultBubbleDataset.CategoryEntry


---


|  |  |  |  |  |  |  |  |  |  |  |
| --- | --- | --- | --- | --- | --- | --- | --- | --- | --- | --- |
| |  |  |  |  |  |  |  |  | | --- | --- | --- | --- | --- | --- | --- | --- | | **Overview** | **Package** | **Class** | **Use** | **Tree** | **Deprecated** | **Index** | **Help** | | |  |
| **PREV CLASS**   **NEXT CLASS** | **FRAMES**    **NO FRAMES**     **All Classes** |
| SUMMARY: NESTED | FIELD | CONSTR | METHOD | DETAIL: FIELD | CONSTR | METHOD |


---


## anl.aida.bubble Class DefaultBubbleDataset.CategoryEntry

```
java.lang.Object
  anl.aida.bubble.DefaultBubbleDataset.CategoryEntry
```

**Enclosing class:**: DefaultBubbleDataset

---

``` private static class DefaultBubbleDataset.CategoryEntry extends java.lang.Object ```

---

| **Field Summary** | |
| --- | --- |
| `(package private)  java.lang.String` | `category` |
| `(package private)  int` | `xIndex` |
| `(package private)  int` | `yIndex` |
| `(package private)  int` | `zIndex` |


| **Constructor Summary** | |
| --- | --- |
| `DefaultBubbleDataset.CategoryEntry()` |


| **Method Summary** | |
| --- | --- |

| **Methods inherited from class java.lang.Object** |
| --- |
| `clone, equals, finalize, getClass, hashCode, notify, notifyAll, toString, wait, wait, wait` |

| **Field Detail** |
| --- |

### xIndex

```
int xIndex
```

---


### yIndex

```
int yIndex
```

---


### zIndex

```
int zIndex
```

---


### category

```
java.lang.String category
```


| **Constructor Detail** |
| --- |

### DefaultBubbleDataset.CategoryEntry

```
DefaultBubbleDataset.CategoryEntry()
```


---


|  |  |  |  |  |  |  |  |  |  |  |
| --- | --- | --- | --- | --- | --- | --- | --- | --- | --- | --- |
| |  |  |  |  |  |  |  |  | | --- | --- | --- | --- | --- | --- | --- | --- | | **Overview** | **Package** | **Class** | **Use** | **Tree** | **Deprecated** | **Index** | **Help** | | |  |
| **PREV CLASS**   **NEXT CLASS** | **FRAMES**    **NO FRAMES**     **All Classes** |
| SUMMARY: NESTED | FIELD | CONSTR | METHOD | DETAIL: FIELD | CONSTR | METHOD |


---
