# Supplementary material
Source: MDPI journal article supplement (https://www.mdpi.com/2071-1050/2/5/1182)
Supplement: s1 [file s1 › Sustainability_Altaweel_EtAl/Client/docs/anl/aida/bubble/DefaultBubbleDataset.html]

DefaultBubbleDataset


---


|  |  |  |  |  |  |  |  |  |  |  |
| --- | --- | --- | --- | --- | --- | --- | --- | --- | --- | --- |
| |  |  |  |  |  |  |  |  | | --- | --- | --- | --- | --- | --- | --- | --- | | **Overview** | **Package** | **Class** | **Use** | **Tree** | **Deprecated** | **Index** | **Help** | | |  |
| **PREV CLASS**   **NEXT CLASS** | **FRAMES**    **NO FRAMES**     **All Classes** |
| SUMMARY: NESTED | FIELD | CONSTR | METHOD | DETAIL: FIELD | CONSTR | METHOD |


---


## anl.aida.bubble Class DefaultBubbleDataset

```
java.lang.Object
  anl.aida.bubble.DefaultBubbleDataset
```

**All Implemented Interfaces:**: BubbleDataset

---

``` public class DefaultBubbleDataset extends java.lang.Object implements BubbleDataset ```

Default implementation of a BubbleDataset that adapts DataFrames to the
BubbleDataset interface.

---

| **Nested Class Summary** | |
| --- | --- |
| `private static class` | `DefaultBubbleDataset.CategoryEntry` |
| `private  class` | `DefaultBubbleDataset.CategoryIter` |


| **Field Summary** | |
| --- | --- |
| `private  java.util.Calendar` | `cal` |
| `private static int` | `CALENDAR_FIELD` |
| `private  java.util.List<DefaultBubbleDataset.CategoryEntry>` | `categories` |
| `private  int[]` | `offsets` |
| `private  int` | `tsCount` |
| `private  anl.aida.data.DataFrame` | `xFrame` |
| `private  NumericRange` | `xRange` |
| `private  anl.aida.data.DataFrame` | `yFrame` |
| `private  NumericRange` | `yRange` |
| `private  anl.aida.data.DataFrame` | `zFrame` |
| `private  NumericRange` | `zRange` |


| **Constructor Summary** | |
| --- | --- |
| `DefaultBubbleDataset(anl.aida.data.DataFrame xFrame, anl.aida.data.DataFrame yFrame, anl.aida.data.DataFrame zFrame)` |
| `DefaultBubbleDataset(anl.aida.data.DataFrame xFrame, anl.aida.data.DataFrame yFrame, anl.aida.data.DataFrame zFrame, int categoryCount)` |


| **Method Summary** | |
| --- | --- |
| `java.lang.Iterable<java.lang.String>` | `categories()`             Gets an iterable over the categories in this dataset. |
| `int` | `getCategoryCount()`             Gets the number of categories in this dataset. |
| `int` | `getCategoryIndex(java.lang.String category)`             Gets the index of the specified category. |
| `java.lang.String` | `getFormattedTimeStep(int timestep)`             Gets the formatted timestep (e.g. |
| `int` | `getTimeStepCount()`             Gets the number of timesteps. |
| `NumericRange` | `getXRange()`             Gets the range of x values over all timesteps and categories. |
| `double` | `getXValue(int categoryIndex, int timestep)`             Gets the x value for the particular category at the specified timestep. |
| `NumericRange` | `getYRange()`             Gets the range of y values over all timesteps and categories. |
| `double` | `getYValue(int categoryIndex, int timestep)`             Gets the y value for the particular category at the specified timestep. |
| `NumericRange` | `getZRange()`             Gets the range of z values over all timesteps and categories. |
| `double` | `getZValue(int categoryIndex, int timestep)`             Gets the z value for the particular category at the specified timestep. |
| `private  void` | `initRanges()` |

| **Methods inherited from class java.lang.Object** |
| --- |
| `clone, equals, finalize, getClass, hashCode, notify, notifyAll, toString, wait, wait, wait` |

| **Field Detail** |
| --- |

### xFrame

```
private anl.aida.data.DataFrame xFrame
```

---


### yFrame

```
private anl.aida.data.DataFrame yFrame
```

---


### zFrame

```
private anl.aida.data.DataFrame zFrame
```

---


### offsets

```
private int[] offsets
```

---


### tsCount

```
private int tsCount
```

---


### categories

```
private java.util.List<DefaultBubbleDataset.CategoryEntry> categories
```

---


### cal

```
private java.util.Calendar cal
```

---


### xRange

```
private NumericRange xRange
```

---


### yRange

```
private NumericRange yRange
```

---


### zRange

```
private NumericRange zRange
```

---


### CALENDAR\_FIELD

```
private static int CALENDAR_FIELD
```


| **Constructor Detail** |
| --- |

### DefaultBubbleDataset

```
public DefaultBubbleDataset(anl.aida.data.DataFrame xFrame,
                            anl.aida.data.DataFrame yFrame,
                            anl.aida.data.DataFrame zFrame)
```

**Parameters:**: `xFrame` -: `yFrame` -: `zFrame` -

---


### DefaultBubbleDataset

```
public DefaultBubbleDataset(anl.aida.data.DataFrame xFrame,
                            anl.aida.data.DataFrame yFrame,
                            anl.aida.data.DataFrame zFrame,
                            int categoryCount)
```

**Parameters:**: `xFrame` -: `yFrame` -: `zFrame` -: `categoryCount` - the number of categories to display. -1 means show all.


| **Method Detail** |
| --- |

### initRanges

```
private void initRanges()
```

---


### categories

```
public java.lang.Iterable<java.lang.String> categories()
```

:   **Description copied from interface: `BubbleDataset`**
:   Gets an iterable over the categories in this dataset.

    :   **Specified by:**: `categories` in interface `BubbleDataset`
    :   **Returns:**: an iterable over the categories in this dataset.

---


### getCategoryIndex

```
public int getCategoryIndex(java.lang.String category)
```

:   **Description copied from interface: `BubbleDataset`**
:   Gets the index of the specified category.

    :   **Specified by:**: `getCategoryIndex` in interface `BubbleDataset`
    :   **Parameters:**: `category` - the category whose index we want **Returns:**: the index of the specified category.

---


### getFormattedTimeStep

```
public java.lang.String getFormattedTimeStep(int timestep)
```

:   **Description copied from interface: `BubbleDataset`**
:   Gets the formatted timestep (e.g. a formatted date,
    a year, etc.)

    :   **Specified by:**: `getFormattedTimeStep` in interface `BubbleDataset`
    :   **Parameters:**: `timestep` - the formatted timestep **Returns:**

---


### getCategoryCount

```
public int getCategoryCount()
```

:   **Description copied from interface: `BubbleDataset`**
:   Gets the number of categories in this dataset.

    :   **Specified by:**: `getCategoryCount` in interface `BubbleDataset`
    :   **Returns:**: the number of categories in this dataset.

---


### getTimeStepCount

```
public int getTimeStepCount()
```

:   **Description copied from interface: `BubbleDataset`**
:   Gets the number of timesteps.

    :   **Specified by:**: `getTimeStepCount` in interface `BubbleDataset`
    :   **Returns:**: the number of timesteps.

---


### getXValue

```
public double getXValue(int categoryIndex,
                        int timestep)
```

:   **Description copied from interface: `BubbleDataset`**
:   Gets the x value for the particular category at the specified timestep.

    :   **Specified by:**: `getXValue` in interface `BubbleDataset`
    :   **Parameters:**: `categoryIndex` - the category index: `timestep` - the timestep **Returns:**: the x value for the particular category at the specified timestep.

---


### getYValue

```
public double getYValue(int categoryIndex,
                        int timestep)
```

:   **Description copied from interface: `BubbleDataset`**
:   Gets the y value for the particular category at the specified timestep.

    :   **Specified by:**: `getYValue` in interface `BubbleDataset`
    :   **Parameters:**: `categoryIndex` - the category index: `timestep` - the timestep **Returns:**: the y value for the particular category at the specified timestep.

---


### getZValue

```
public double getZValue(int categoryIndex,
                        int timestep)
```

:   **Description copied from interface: `BubbleDataset`**
:   Gets the z value for the particular category at the specified timestep.

    :   **Specified by:**: `getZValue` in interface `BubbleDataset`
    :   **Parameters:**: `categoryIndex` - the category index: `timestep` - the timestep **Returns:**: the z value for the particular category at the specified timestep.

---


### getXRange

```
public NumericRange getXRange()
```

:   **Description copied from interface: `BubbleDataset`**
:   Gets the range of x values over all timesteps and categories.

    :   **Specified by:**: `getXRange` in interface `BubbleDataset`
    :   **Returns:**: the range of x values over all timesteps and categories.

---


### getYRange

```
public NumericRange getYRange()
```

:   **Description copied from interface: `BubbleDataset`**
:   Gets the range of y values over all timesteps and categories.

    :   **Specified by:**: `getYRange` in interface `BubbleDataset`
    :   **Returns:**: the range of y values over all timesteps and categories.

---


### getZRange

```
public NumericRange getZRange()
```

:   **Description copied from interface: `BubbleDataset`**
:   Gets the range of z values over all timesteps and categories.

    :   **Specified by:**: `getZRange` in interface `BubbleDataset`
    :   **Returns:**: the range of z values over all timesteps and categories.


---


|  |  |  |  |  |  |  |  |  |  |  |
| --- | --- | --- | --- | --- | --- | --- | --- | --- | --- | --- |
| |  |  |  |  |  |  |  |  | | --- | --- | --- | --- | --- | --- | --- | --- | | **Overview** | **Package** | **Class** | **Use** | **Tree** | **Deprecated** | **Index** | **Help** | | |  |
| **PREV CLASS**   **NEXT CLASS** | **FRAMES**    **NO FRAMES**     **All Classes** |
| SUMMARY: NESTED | FIELD | CONSTR | METHOD | DETAIL: FIELD | CONSTR | METHOD |


---
