# Supplementary material
Source: MDPI journal article supplement (https://www.mdpi.com/2071-1050/2/5/1182)
Supplement: s1 [file s1 › Sustainability_Altaweel_EtAl/Client/docs/anl/aida/bubble/DefaultBubbleRenderer.html]

DefaultBubbleRenderer


---


|  |  |  |  |  |  |  |  |  |  |  |
| --- | --- | --- | --- | --- | --- | --- | --- | --- | --- | --- |
| |  |  |  |  |  |  |  |  | | --- | --- | --- | --- | --- | --- | --- | --- | | **Overview** | **Package** | **Class** | **Use** | **Tree** | **Deprecated** | **Index** | **Help** | | |  |
| **PREV CLASS**   **NEXT CLASS** | **FRAMES**    **NO FRAMES**     **All Classes** |
| SUMMARY: NESTED | FIELD | CONSTR | METHOD | DETAIL: FIELD | CONSTR | METHOD |


---


## anl.aida.bubble Class DefaultBubbleRenderer

```
java.lang.Object
  anl.aida.bubble.DefaultBubbleRenderer
```

---

``` public class DefaultBubbleRenderer extends java.lang.Object ```

---

| **Field Summary** | |
| --- | --- |
| `static long` | `ANIM_DURATION` |
| `private  java.util.Map<java.lang.Integer,Bubble>` | `bubbles` |
| `private  edu.umd.cs.piccolo.PLayer` | `layer` |
| `private static int` | `MAX_BUBBLE_SIZE` |
| `private  int` | `selectedCount` |


| **Constructor Summary** | |
| --- | --- |
| `DefaultBubbleRenderer(BubbleDataset dataset, BubbleTooltip tooltip)` |


| **Method Summary** | |
| --- | --- |
| `void` | `addLayers(edu.umd.cs.piccolo.PNode parent)` |
| `java.awt.Color[]` | `generateColors(int n)` |
| `void` | `selectBubble(int categoryIndex, boolean selected)`             Selects or unselects the bubble with the specified category index. |
| `void` | `setNodeVisible(int category, boolean visible)` |
| `edu.umd.cs.piccolo.PNode` | `update(int category, float px, float py, double scale)` |
| `edu.umd.cs.piccolo.PNode` | `updateAnimate(int category, float px, float py, double scale)` |

| **Methods inherited from class java.lang.Object** |
| --- |
| `clone, equals, finalize, getClass, hashCode, notify, notifyAll, toString, wait, wait, wait` |

| **Field Detail** |
| --- |

### ANIM\_DURATION

```
public static final long ANIM_DURATION
```

**See Also:**: Constant Field Values

---


### MAX\_BUBBLE\_SIZE

```
private static final int MAX_BUBBLE_SIZE
```

**See Also:**: Constant Field Values

---


### bubbles

```
private java.util.Map<java.lang.Integer,Bubble> bubbles
```

---


### layer

```
private edu.umd.cs.piccolo.PLayer layer
```

---


### selectedCount

```
private int selectedCount
```


| **Constructor Detail** |
| --- |

### DefaultBubbleRenderer

```
public DefaultBubbleRenderer(BubbleDataset dataset,
                             BubbleTooltip tooltip)
```


| **Method Detail** |
| --- |

### generateColors

```
public java.awt.Color[] generateColors(int n)
```

---


### selectBubble

```
public void selectBubble(int categoryIndex,
                         boolean selected)
```

:   Selects or unselects the bubble with the specified category index.

    :   **Parameters:**: `categoryIndex` - in the index of the bubble: `selected` - whether or not the bubble is selected or unselected.

---


### addLayers

```
public void addLayers(edu.umd.cs.piccolo.PNode parent)
```

---


### update

```
public edu.umd.cs.piccolo.PNode update(int category,
                                       float px,
                                       float py,
                                       double scale)
```

---


### updateAnimate

```
public edu.umd.cs.piccolo.PNode updateAnimate(int category,
                                              float px,
                                              float py,
                                              double scale)
```

---


### setNodeVisible

```
public void setNodeVisible(int category,
                           boolean visible)
```


---


|  |  |  |  |  |  |  |  |  |  |  |
| --- | --- | --- | --- | --- | --- | --- | --- | --- | --- | --- |
| |  |  |  |  |  |  |  |  | | --- | --- | --- | --- | --- | --- | --- | --- | | **Overview** | **Package** | **Class** | **Use** | **Tree** | **Deprecated** | **Index** | **Help** | | |  |
| **PREV CLASS**   **NEXT CLASS** | **FRAMES**    **NO FRAMES**     **All Classes** |
| SUMMARY: NESTED | FIELD | CONSTR | METHOD | DETAIL: FIELD | CONSTR | METHOD |


---
