# Supplementary material
Source: MDPI journal article supplement (https://www.mdpi.com/2071-1050/2/5/1182)
Supplement: s1 [file s1 › Sustainability_Altaweel_EtAl/Client/docs/anl/aida/bubble/LogDomainAxis.html]

LogDomainAxis


---


|  |  |  |  |  |  |  |  |  |  |  |
| --- | --- | --- | --- | --- | --- | --- | --- | --- | --- | --- |
| |  |  |  |  |  |  |  |  | | --- | --- | --- | --- | --- | --- | --- | --- | | **Overview** | **Package** | **Class** | **Use** | **Tree** | **Deprecated** | **Index** | **Help** | | |  |
| **PREV CLASS**   **NEXT CLASS** | **FRAMES**    **NO FRAMES**     **All Classes** |
| SUMMARY: NESTED | FIELD | CONSTR | METHOD | DETAIL: FIELD | CONSTR | METHOD |


---


## anl.aida.bubble Class LogDomainAxis

```
java.lang.Object
  edu.umd.cs.piccolo.PNode
      edu.umd.cs.piccolox.nodes.PComposite
          anl.aida.bubble.AbstractAxis
              anl.aida.bubble.AbstractDomainAxis
                  anl.aida.bubble.LogDomainAxis
```

**All Implemented Interfaces:**: java.awt.print.Printable, java.io.Serializable, java.lang.Cloneable

---

``` public class LogDomainAxis extends AbstractDomainAxis ```

Domain Axis with logarithmic scale.

**See Also:**: Serialized Form

---

| **Nested Class Summary** | |
| --- | --- |

| **Nested classes/interfaces inherited from class edu.umd.cs.piccolo.PNode** |
| --- |
| `edu.umd.cs.piccolo.PNode.PSceneGraphDelegate` |


| **Field Summary** | |
| --- | --- |

| **Fields inherited from class anl.aida.bubble.AbstractAxis** |
| --- |
| `axisLabel, canvas, highlight, highlightFormatter, insets, label, labelFormatter, origRange, pixelExtent, range, tickLocations` |

| **Fields inherited from class edu.umd.cs.piccolo.PNode** |
| --- |
| `PROPERTY_BOUNDS, PROPERTY_CHILDREN, PROPERTY_CHILDREN_PICKABLE, PROPERTY_CLIENT_PROPERTIES, PROPERTY_CODE_BOUNDS, PROPERTY_CODE_CHILDREN, PROPERTY_CODE_CHILDREN_PICKABLE, PROPERTY_CODE_CLIENT_PROPERTIES, PROPERTY_CODE_FULL_BOUNDS, PROPERTY_CODE_PAINT, PROPERTY_CODE_PARENT, PROPERTY_CODE_PICKABLE, PROPERTY_CODE_TRANSFORM, PROPERTY_CODE_TRANSPARENCY, PROPERTY_CODE_VISIBLE, PROPERTY_FULL_BOUNDS, PROPERTY_PAINT, PROPERTY_PARENT, PROPERTY_PICKABLE, PROPERTY_TRANSFORM, PROPERTY_TRANSPARENCY, PROPERTY_VISIBLE, SCENE_GRAPH_DELEGATE` |

| **Fields inherited from interface java.awt.print.Printable** |
| --- |
| `NO_SUCH_PAGE, PAGE_EXISTS` |


| **Constructor Summary** | |
| --- | --- |
| `LogDomainAxis()` |
| `LogDomainAxis(NumericRange range, java.lang.String label)` |


| **Method Summary** | |
| --- | --- |
| `private  double` | `addTickMark(edu.umd.cs.piccolo.nodes.PPath ticks, int tick, double labelOffset)` |
| `private  int` | `findFirstTick(int startingVal)` |
| `private  int` | `findStartingExp()` |
| `float` | `getPixelLocation(double val)`             Gets the pixel location for the data value. |
| `double` | `getValueForPixel(double pixel)`             Gets the axis value for the pixel location. |
| `protected  void` | `layoutTicks(edu.umd.cs.piccolo.nodes.PPath ticks)` |

| **Methods inherited from class anl.aida.bubble.AbstractDomainAxis** |
| --- |
| `addLabel, highlight, layout` |

| **Methods inherited from class anl.aida.bubble.AbstractAxis** |
| --- |
| `getLabel, getPixelExtent, getPixelLocationLin, getPixelLocationLog, getTickLocations, getValueForPixelLin, getValueForPixelLog, initRange, removeHighlight, resetRange, setLabel, zoomTo` |

| **Methods inherited from class edu.umd.cs.piccolox.nodes.PComposite** |
| --- |
| `fullPick` |

| **Methods inherited from class edu.umd.cs.piccolo.PNode** |
| --- |
| `addActivity, addAttribute, addChild, addChild, addChildren, addClientProperty, addInputEventListener, addPropertyChangeListener, addPropertyChangeListener, animateToBounds, animateToColor, animateToPositionScaleRotation, animateToTransform, animateToTransparency, animateTransformToBounds, centerBoundsOnPoint, centerFullBoundsOnPoint, clone, computeFullBounds, endResizeBounds, findIntersectingNodes, fireChildPropertyChange, firePropertyChange, fullIntersects, fullPaint, getAllNodes, getAllNodes, getAttribute, getAttribute, getBooleanAttribute, getBounds, getBoundsChanged, getBoundsReference, getBoundsVolatile, getChild, getChildBoundsInvalid, getChildBoundsVolatile, getChildPaintInvalid, getChildrenCount, getChildrenIterator, getChildrenPickable, getChildrenReference, getClientProperties, getClientProperty, getClientPropertyKeysEnumeration, getClientPropertyKeysIterator, getDoubleAttribute, getFullBounds, getFullBoundsInvalid, getFullBoundsReference, getGlobalBounds, getGlobalFullBounds, getGlobalRotation, getGlobalScale, getGlobalToLocalTransform, getGlobalTranslation, getHeight, getIntegerAttribute, getInverseTransform, getListenerList, getLocalToGlobalTransform, getOccluded, getOffset, getPaint, getPaintInvalid, getParent, getPickable, getPropertyChangeParentMask, getRoot, getRotation, getScale, getTransform, getTransformReference, getTransparency, getUnionOfChildrenBounds, getVisible, getWidth, getX, getXOffset, getY, getYOffset, globalToLocal, globalToLocal, globalToLocal, indexOfChild, internalUpdateBounds, intersects, invalidateFullBounds, invalidateLayout, invalidatePaint, isAncestorOf, isDescendentOf, isDescendentOfRoot, isOpaque, layoutChildren, lerp, localToGlobal, localToGlobal, localToGlobal, localToParent, localToParent, localToParent, moveInBackOf, moveInFrontOf, moveToBack, moveToFront, offset, paint, paintAfterChildren, paramString, parentBoundsChanged, parentToLocal, parentToLocal, parentToLocal, pick, pickAfterChildren, position, print, print, removeAllChildren, removeChild, removeChild, removeChildren, removeFromParent, removeInputEventListener, removePropertyChangeListener, removePropertyChangeListener, repaint, repaintFrom, reparent, replaceWith, resetBounds, rotate, rotateAboutPoint, rotateAboutPoint, rotateInPlace, scale, scaleAboutPoint, scaleAboutPoint, setBounds, setBounds, setBoundsChanged, setChildBoundsInvalid, setChildBoundsVolatile, setChildPaintInvalid, setChildrenPickable, setFullBoundsInvalid, setGlobalRotation, setGlobalScale, setGlobalTranslation, setHeight, setOccluded, setOffset, setOffset, setPaint, setPaintInvalid, setParent, setPickable, setPropertyChangeParentMask, setRotation, setScale, setTransform, setTransparency, setVisible, setWidth, setX, setY, signalBoundsChanged, startResizeBounds, toImage, toImage, toImage, toString, transformBy, translate, validateFullBounds, validateFullPaint` |

| **Methods inherited from class java.lang.Object** |
| --- |
| `equals, finalize, getClass, hashCode, notify, notifyAll, wait, wait, wait` |

| **Constructor Detail** |
| --- |

### LogDomainAxis

```
public LogDomainAxis()
```

---


### LogDomainAxis

```
public LogDomainAxis(NumericRange range,
                     java.lang.String label)
```


| **Method Detail** |
| --- |

### findStartingExp

```
private int findStartingExp()
```

---


### findFirstTick

```
private int findFirstTick(int startingVal)
```

---


### layoutTicks

```
protected void layoutTicks(edu.umd.cs.piccolo.nodes.PPath ticks)
```

:   **Specified by:**: `layoutTicks` in class `AbstractDomainAxis`

---


### addTickMark

```
private double addTickMark(edu.umd.cs.piccolo.nodes.PPath ticks,
                           int tick,
                           double labelOffset)
```

---


### getPixelLocation

```
public float getPixelLocation(double val)
```

:   **Description copied from class: `AbstractAxis`**
:   Gets the pixel location for the data value.

    :   **Specified by:**: `getPixelLocation` in class `AbstractAxis`
    :   **Parameters:**: `val` - the value to get the pixel location for **Returns:**: the pixel location for the data value.

---


### getValueForPixel

```
public double getValueForPixel(double pixel)
```

:   **Description copied from class: `AbstractAxis`**
:   Gets the axis value for the pixel location.

    :   **Specified by:**: `getValueForPixel` in class `AbstractAxis`
    :   **Parameters:**: `pixel` - the pixel to get the axis value for **Returns:**: the axis value for the pixel location.


---


|  |  |  |  |  |  |  |  |  |  |  |
| --- | --- | --- | --- | --- | --- | --- | --- | --- | --- | --- |
| |  |  |  |  |  |  |  |  | | --- | --- | --- | --- | --- | --- | --- | --- | | **Overview** | **Package** | **Class** | **Use** | **Tree** | **Deprecated** | **Index** | **Help** | | |  |
| **PREV CLASS**   **NEXT CLASS** | **FRAMES**    **NO FRAMES**     **All Classes** |
| SUMMARY: NESTED | FIELD | CONSTR | METHOD | DETAIL: FIELD | CONSTR | METHOD |


---
