# Supplementary material
Source: MDPI journal article supplement (https://www.mdpi.com/2071-1050/2/5/1182)
Supplement: s1 [file s1 › Sustainability_Altaweel_EtAl/Client/docs/anl/aida/bubble/NumericRange.html]

NumericRange


---


|  |  |  |  |  |  |  |  |  |  |  |
| --- | --- | --- | --- | --- | --- | --- | --- | --- | --- | --- |
| |  |  |  |  |  |  |  |  | | --- | --- | --- | --- | --- | --- | --- | --- | | **Overview** | **Package** | **Class** | **Use** | **Tree** | **Deprecated** | **Index** | **Help** | | |  |
| **PREV CLASS**   **NEXT CLASS** | **FRAMES**    **NO FRAMES**     **All Classes** |
| SUMMARY: NESTED | FIELD | CONSTR | METHOD | DETAIL: FIELD | CONSTR | METHOD |


---


## anl.aida.bubble Class NumericRange

```
java.lang.Object
  anl.aida.bubble.NumericRange
```

---

``` public class NumericRange extends java.lang.Object ```

Encapsulates a numeric range.

---

| **Field Summary** | |
| --- | --- |
| `(package private)  double` | `end` |
| `(package private)  double` | `length` |
| `(package private)  double` | `start` |


| **Constructor Summary** | |
| --- | --- |
| `NumericRange(double start, double end)` |
| `NumericRange(NumericRange range)` |


| **Method Summary** | |
| --- | --- |
| `double` | `getEnd()` |
| `double` | `getLength()`             Gets the length of the range (i.e. |
| `double` | `getStart()` |
| `java.lang.String` | `toString()` |

| **Methods inherited from class java.lang.Object** |
| --- |
| `clone, equals, finalize, getClass, hashCode, notify, notifyAll, wait, wait, wait` |

| **Field Detail** |
| --- |

### start

```
double start
```

---


### end

```
double end
```

---


### length

```
double length
```


| **Constructor Detail** |
| --- |

### NumericRange

```
public NumericRange(double start,
                    double end)
```

---


### NumericRange

```
public NumericRange(NumericRange range)
```


| **Method Detail** |
| --- |

### getStart

```
public double getStart()
```

:   **Returns:**: the start

---


### getEnd

```
public double getEnd()
```

:   **Returns:**: the end

---


### getLength

```
public double getLength()
```

:   Gets the length of the range (i.e. max - min).

    :   **Returns:**: the length of the range (i.e. max - min).

---


### toString

```
public java.lang.String toString()
```

:   **Overrides:**: `toString` in class `java.lang.Object`


---


|  |  |  |  |  |  |  |  |  |  |  |
| --- | --- | --- | --- | --- | --- | --- | --- | --- | --- | --- |
| |  |  |  |  |  |  |  |  | | --- | --- | --- | --- | --- | --- | --- | --- | | **Overview** | **Package** | **Class** | **Use** | **Tree** | **Deprecated** | **Index** | **Help** | | |  |
| **PREV CLASS**   **NEXT CLASS** | **FRAMES**    **NO FRAMES**     **All Classes** |
| SUMMARY: NESTED | FIELD | CONSTR | METHOD | DETAIL: FIELD | CONSTR | METHOD |


---
