# Supplementary material
Source: MDPI journal article supplement (https://www.mdpi.com/2071-1050/2/5/1182)
Supplement: s1 [file s1 › Sustainability_Altaweel_EtAl/Client/docs/anl/aida/bubble/package-frame.html]

anl.aida.bubble


anl.aida.bubble

|  |
| --- |
| Interfaces    *BubbleConstants*   *BubbleDataset*   *BubblePlot.Updater*   *BubbleRenderer*   *BubbleSelectionListener* |

|  |
| --- |
| Classes    AbstractAxis   AbstractDomainAxis   AxisHighlight   Bubble   BubbleChart   BubbleChart.Category   BubbleChart.CategoryComparator   BubbleData   BubbleLayer   BubblePlot   BubblePlotCreator   BubbleSlider   BubbleTooltip   DefaultBubbleDataset   DefaultBubbleDataset.CategoryEntry   DefaultBubbleRenderer   DomainAxis   LogDomainAxis   NumericRange   RangeAxis   TickLocator   Zoomer |

|  |
| --- |
| Enums    Bubble.State |
