# Supplementary material
Source: MDPI journal article supplement (https://www.mdpi.com/2071-1050/2/5/1182)
Supplement: s1 [file s1 › Sustainability_Altaweel_EtAl/Client/docs/anl/aida/bubble/package-summary.html]

anl.aida.bubble


---


|  |  |  |  |  |  |  |  |  |  |  |
| --- | --- | --- | --- | --- | --- | --- | --- | --- | --- | --- |
| |  |  |  |  |  |  |  |  | | --- | --- | --- | --- | --- | --- | --- | --- | | **Overview** | **Package** | Class | **Use** | **Tree** | **Deprecated** | **Index** | **Help** | | |  |
| **PREV PACKAGE**   **NEXT PACKAGE** | **FRAMES**    **NO FRAMES**     **All Classes** |


---

## Package anl.aida.bubble

| **Interface Summary** | |
| --- | --- |
| **BubbleConstants** |  |
| **BubbleDataset** | Data access interface for a bubble chart. |
| **BubblePlot.Updater** |  |
| **BubbleRenderer** | Renders bubbles in a BubblePlot. |
| **BubbleSelectionListener** | Interface for classes that want to listen for bubble selection events. |

| **Class Summary** | |
| --- | --- |
| **AbstractAxis** |  |
| **AbstractDomainAxis** | Abstract implementation of a Domain Axis. |
| **AxisHighlight** |  |
| **Bubble** | PNode that represents the bubble in the bubble graph. |
| **BubbleChart** |  |
| **BubbleChart.Category** |  |
| **BubbleChart.CategoryComparator** |  |
| **BubbleData** | Encapsulates the data represented by a single Bubble. |
| **BubbleLayer** | PLayer implementation to work around picking issue. |
| **BubblePlot** |  |
| **BubblePlotCreator** |  |
| **BubbleSlider** |  |
| **BubbleTooltip** |  |
| **DefaultBubbleDataset** | Default implementation of a BubbleDataset that adapts DataFrames to the BubbleDataset interface. |
| **DefaultBubbleDataset.CategoryEntry** |  |
| **DefaultBubbleRenderer** |  |
| **DomainAxis** |  |
| **LogDomainAxis** | Domain Axis with logarithmic scale. |
| **NumericRange** | Encapsulates a numeric range. |
| **RangeAxis** |  |
| **TickLocator** | Produces Tick mark locations given a range and the desired number of ticks. |
| **Zoomer** | Handles zooms of the bubble chart |

| **Enum Summary** | |
| --- | --- |
| **Bubble.State** |  |

---


|  |  |  |  |  |  |  |  |  |  |  |
| --- | --- | --- | --- | --- | --- | --- | --- | --- | --- | --- |
| |  |  |  |  |  |  |  |  | | --- | --- | --- | --- | --- | --- | --- | --- | | **Overview** | **Package** | Class | **Use** | **Tree** | **Deprecated** | **Index** | **Help** | | |  |
| **PREV PACKAGE**   **NEXT PACKAGE** | **FRAMES**    **NO FRAMES**     **All Classes** |


---
