# Supplementary material
Source: MDPI journal article supplement (https://www.mdpi.com/2071-1050/2/5/1182)
Supplement: s1 [file s1 › Sustainability_Altaweel_EtAl/Client/docs/anl/aida/bubble/package-tree.html]

anl.aida.bubble Class Hierarchy


---


|  |  |  |  |  |  |  |  |  |  |  |
| --- | --- | --- | --- | --- | --- | --- | --- | --- | --- | --- |
| |  |  |  |  |  |  |  |  | | --- | --- | --- | --- | --- | --- | --- | --- | | **Overview** | **Package** | Class | Use | **Tree** | **Deprecated** | **Index** | **Help** | | |  |
| **PREV**   **NEXT** | **FRAMES**    **NO FRAMES**     **All Classes** |


---


## Hierarchy For Package anl.aida.bubble

**Package Hierarchies:**: All Packages

---

## Class Hierarchy

- java.lang.Object
  - anl.aida.bubble.**BubbleChart**- anl.aida.bubble.**BubbleChart.Category**- anl.aida.bubble.**BubbleChart.CategoryComparator** (implements java.util.Comparator<T>)- anl.aida.bubble.**BubbleData**- anl.aida.bubble.**BubblePlot**- anl.aida.bubble.**BubbleSlider**- anl.aida.bubble.**DefaultBubbleDataset** (implements anl.aida.bubble.BubbleDataset)- anl.aida.bubble.**DefaultBubbleDataset.CategoryEntry**- anl.aida.bubble.**DefaultBubbleDataset.CategoryIter** (implements java.lang.Iterable<T>, java.util.Iterator<E>)- anl.aida.bubble.**DefaultBubbleRenderer**- anl.aida.bubble.**NumericRange**- edu.umd.cs.piccolo.event.PBasicInputEventHandler (implements edu.umd.cs.piccolo.event.PInputEventListener)
                          - anl.aida.bubble.**BubbleTooltip**- anl.aida.bubble.**Zoomer**- edu.umd.cs.piccolo.PNode (implements java.lang.Cloneable, java.awt.print.Printable, java.io.Serializable)
                            - anl.aida.bubble.**AxisHighlight**- edu.umd.cs.piccolox.nodes.PComposite
                                - anl.aida.bubble.**AbstractAxis**
                                  - anl.aida.bubble.**AbstractDomainAxis**
                                    - anl.aida.bubble.**DomainAxis**- anl.aida.bubble.**LogDomainAxis**- anl.aida.bubble.**RangeAxis**- anl.aida.bubble.**Bubble**- edu.umd.cs.piccolo.PLayer
                                  - anl.aida.bubble.**BubbleLayer**- javax.swing.SwingWorker<T,V> (implements java.util.concurrent.RunnableFuture<V>)
                              - anl.aida.bubble.**BubblePlotCreator**- anl.aida.bubble.**TickLocator**

## Interface Hierarchy

- anl.aida.bubble.**BubbleConstants**- anl.aida.bubble.**BubbleDataset**- anl.aida.bubble.**BubblePlot.Updater**- anl.aida.bubble.**BubbleRenderer**- anl.aida.bubble.**BubbleSelectionListener**

## Enum Hierarchy

- java.lang.Object
  - java.lang.Enum<E> (implements java.lang.Comparable<T>, java.io.Serializable)
    - anl.aida.bubble.**Bubble.State**

---


|  |  |  |  |  |  |  |  |  |  |  |
| --- | --- | --- | --- | --- | --- | --- | --- | --- | --- | --- |
| |  |  |  |  |  |  |  |  | | --- | --- | --- | --- | --- | --- | --- | --- | | **Overview** | **Package** | Class | Use | **Tree** | **Deprecated** | **Index** | **Help** | | |  |
| **PREV**   **NEXT** | **FRAMES**    **NO FRAMES**     **All Classes** |


---
