# Supplementary material
Source: MDPI journal article supplement (https://www.mdpi.com/2071-1050/2/5/1182)
Supplement: s1 [file s1 › Sustainability_Altaweel_EtAl/Client/docs/anl/aida/bubble/package-use.html]

Uses of Package anl.aida.bubble


---


|  |  |  |  |  |  |  |  |  |  |  |
| --- | --- | --- | --- | --- | --- | --- | --- | --- | --- | --- |
| |  |  |  |  |  |  |  |  | | --- | --- | --- | --- | --- | --- | --- | --- | | **Overview** | **Package** | Class | **Use** | **Tree** | **Deprecated** | **Index** | **Help** | | |  |
| PREV   NEXT | **FRAMES**    **NO FRAMES**     **All Classes** |


---


## **Uses of Package anl.aida.bubble**

| Packages that use anl.aida.bubble | |
| --- | --- |
| **anl.aida.bubble** |  |
| **anl.aida.plot** |  |

| Classes in anl.aida.bubble used by anl.aida.bubble | |
| --- | --- |
| ****AbstractAxis**** |
| ****AbstractDomainAxis****             Abstract implementation of a Domain Axis. |
| ****AxisHighlight**** |
| ****Bubble****             PNode that represents the bubble in the bubble graph. |
| ****Bubble.State**** |
| ****BubbleChart.Category**** |
| ****BubbleChart.CategoryComparator**** |
| ****BubbleDataset****             Data access interface for a bubble chart. |
| ****BubblePlot**** |
| ****BubblePlot.Updater**** |
| ****BubbleSelectionListener****             Interface for classes that want to listen for bubble selection events. |
| ****BubbleSlider**** |
| ****BubbleTooltip**** |
| ****DefaultBubbleDataset.CategoryEntry**** |
| ****DefaultBubbleRenderer**** |
| ****NumericRange****             Encapsulates a numeric range. |
| ****RangeAxis**** |

| Classes in anl.aida.bubble used by anl.aida.plot | |
| --- | --- |
| ****BubbleChart**** |
| ****BubbleDataset****             Data access interface for a bubble chart. |
| ****NumericRange****             Encapsulates a numeric range. |

---


|  |  |  |  |  |  |  |  |  |  |  |
| --- | --- | --- | --- | --- | --- | --- | --- | --- | --- | --- |
| |  |  |  |  |  |  |  |  | | --- | --- | --- | --- | --- | --- | --- | --- | | **Overview** | **Package** | Class | **Use** | **Tree** | **Deprecated** | **Index** | **Help** | | |  |
| PREV   NEXT | **FRAMES**    **NO FRAMES**     **All Classes** |


---
