# Supplementary material
Source: MDPI journal article supplement (https://www.mdpi.com/2071-1050/2/5/1182)
Supplement: s1 [file s1 › Sustainability_Altaweel_EtAl/Client/docs/anl/aida/bubble/TickLocator.html]

TickLocator


---


|  |  |  |  |  |  |  |  |  |  |  |
| --- | --- | --- | --- | --- | --- | --- | --- | --- | --- | --- |
| |  |  |  |  |  |  |  |  | | --- | --- | --- | --- | --- | --- | --- | --- | | **Overview** | **Package** | **Class** | **Use** | **Tree** | **Deprecated** | **Index** | **Help** | | |  |
| **PREV CLASS**   **NEXT CLASS** | **FRAMES**    **NO FRAMES**     **All Classes** |
| SUMMARY: NESTED | FIELD | CONSTR | METHOD | DETAIL: FIELD | CONSTR | METHOD |


---


## anl.aida.bubble Class TickLocator

```
java.lang.Object
  anl.aida.bubble.TickLocator
```

---

``` public class TickLocator extends java.lang.Object ```

Produces Tick mark locations given a range and the desired number of ticks.
Uses the loose tick method from Graphics Gems.

---

| **Field Summary** | |
| --- | --- |
| `private  double` | `current` |
| `private  double` | `max` |
| `private  double` | `min` |
| `private  int` | `nfrac` |
| `private  double` | `spacing` |


| **Constructor Summary** | |
| --- | --- |
| `TickLocator(NumericRange nRange, int numTicks)` |


| **Method Summary** | |
| --- | --- |
| `int` | `getFracDigits()` |
| `double` | `getMax()` |
| `double` | `getMin()` |
| `boolean` | `hasNext()` |
| `double` | `next()` |
| `private  double` | `niceNum(double val, boolean round)` |

| **Methods inherited from class java.lang.Object** |
| --- |
| `clone, equals, finalize, getClass, hashCode, notify, notifyAll, toString, wait, wait, wait` |

| **Field Detail** |
| --- |

### spacing

```
private double spacing
```

---


### min

```
private double min
```

---


### max

```
private double max
```

---


### nfrac

```
private int nfrac
```

---


### current

```
private double current
```


| **Constructor Detail** |
| --- |

### TickLocator

```
public TickLocator(NumericRange nRange,
                   int numTicks)
```


| **Method Detail** |
| --- |

### getMin

```
public double getMin()
```

---


### getMax

```
public double getMax()
```

---


### getFracDigits

```
public int getFracDigits()
```

---


### hasNext

```
public boolean hasNext()
```

---


### next

```
public double next()
```

---


### niceNum

```
private double niceNum(double val,
                       boolean round)
```


---


|  |  |  |  |  |  |  |  |  |  |  |
| --- | --- | --- | --- | --- | --- | --- | --- | --- | --- | --- |
| |  |  |  |  |  |  |  |  | | --- | --- | --- | --- | --- | --- | --- | --- | | **Overview** | **Package** | **Class** | **Use** | **Tree** | **Deprecated** | **Index** | **Help** | | |  |
| **PREV CLASS**   **NEXT CLASS** | **FRAMES**    **NO FRAMES**     **All Classes** |
| SUMMARY: NESTED | FIELD | CONSTR | METHOD | DETAIL: FIELD | CONSTR | METHOD |


---
