# Supplementary material
Source: MDPI journal article supplement (https://www.mdpi.com/2071-1050/2/5/1182)
Supplement: s1 [file s1 › Sustainability_Altaweel_EtAl/Client/docs/anl/aida/bubble/Zoomer.html]

Zoomer


---


|  |  |  |  |  |  |  |  |  |  |  |
| --- | --- | --- | --- | --- | --- | --- | --- | --- | --- | --- |
| |  |  |  |  |  |  |  |  | | --- | --- | --- | --- | --- | --- | --- | --- | | **Overview** | **Package** | **Class** | **Use** | **Tree** | **Deprecated** | **Index** | **Help** | | |  |
| **PREV CLASS**   NEXT CLASS | **FRAMES**    **NO FRAMES**     **All Classes** |
| SUMMARY: NESTED | FIELD | CONSTR | METHOD | DETAIL: FIELD | CONSTR | METHOD |


---


## anl.aida.bubble Class Zoomer

```
java.lang.Object
  edu.umd.cs.piccolo.event.PBasicInputEventHandler
      anl.aida.bubble.Zoomer
```

**All Implemented Interfaces:**: edu.umd.cs.piccolo.event.PInputEventListener, java.util.EventListener

---

``` public class Zoomer extends edu.umd.cs.piccolo.event.PBasicInputEventHandler ```

Handles zooms of the bubble chart

---

| **Field Summary** | |
| --- | --- |
| `private  edu.umd.cs.piccolo.util.PBounds` | `bounds` |
| `private  BubblePlot` | `bubblePlot` |
| `private  edu.umd.cs.piccolo.PCamera` | `camera` |
| `private  edu.umd.cs.piccolo.PNode` | `plot` |
| `private  java.awt.geom.Point2D` | `start` |
| `private  edu.umd.cs.piccolo.PNode` | `zoomBox` |


| **Constructor Summary** | |
| --- | --- |
| `Zoomer(BubblePlot bubblePlot)` |


| **Method Summary** | |
| --- | --- |
| `private  java.awt.geom.Rectangle2D` | `createBox(java.awt.geom.Point2D end)` |
| `void` | `mouseDragged(edu.umd.cs.piccolo.event.PInputEvent e)` |
| `void` | `mousePressed(edu.umd.cs.piccolo.event.PInputEvent e)` |
| `void` | `mouseReleased(edu.umd.cs.piccolo.event.PInputEvent e)` |

| **Methods inherited from class edu.umd.cs.piccolo.event.PBasicInputEventHandler** |
| --- |
| `acceptsEvent, getEventFilter, keyboardFocusGained, keyboardFocusLost, keyPressed, keyReleased, keyTyped, mouseClicked, mouseEntered, mouseExited, mouseMoved, mouseWheelRotated, mouseWheelRotatedByBlock, paramString, processEvent, setEventFilter, toString` |

| **Methods inherited from class java.lang.Object** |
| --- |
| `clone, equals, finalize, getClass, hashCode, notify, notifyAll, wait, wait, wait` |

| **Field Detail** |
| --- |

### start

```
private java.awt.geom.Point2D start
```

---


### plot

```
private edu.umd.cs.piccolo.PNode plot
```

---


### zoomBox

```
private edu.umd.cs.piccolo.PNode zoomBox
```

---


### camera

```
private edu.umd.cs.piccolo.PCamera camera
```

---


### bounds

```
private edu.umd.cs.piccolo.util.PBounds bounds
```

---


### bubblePlot

```
private BubblePlot bubblePlot
```


| **Constructor Detail** |
| --- |

### Zoomer

```
public Zoomer(BubblePlot bubblePlot)
```


| **Method Detail** |
| --- |

### mousePressed

```
public void mousePressed(edu.umd.cs.piccolo.event.PInputEvent e)
```

:   **Overrides:**: `mousePressed` in class `edu.umd.cs.piccolo.event.PBasicInputEventHandler`

---


### createBox

```
private java.awt.geom.Rectangle2D createBox(java.awt.geom.Point2D end)
```

---


### mouseDragged

```
public void mouseDragged(edu.umd.cs.piccolo.event.PInputEvent e)
```

:   **Overrides:**: `mouseDragged` in class `edu.umd.cs.piccolo.event.PBasicInputEventHandler`

---


### mouseReleased

```
public void mouseReleased(edu.umd.cs.piccolo.event.PInputEvent e)
```

:   **Overrides:**: `mouseReleased` in class `edu.umd.cs.piccolo.event.PBasicInputEventHandler`


---


|  |  |  |  |  |  |  |  |  |  |  |
| --- | --- | --- | --- | --- | --- | --- | --- | --- | --- | --- |
| |  |  |  |  |  |  |  |  | | --- | --- | --- | --- | --- | --- | --- | --- | | **Overview** | **Package** | **Class** | **Use** | **Tree** | **Deprecated** | **Index** | **Help** | | |  |
| **PREV CLASS**   NEXT CLASS | **FRAMES**    **NO FRAMES**     **All Classes** |
| SUMMARY: NESTED | FIELD | CONSTR | METHOD | DETAIL: FIELD | CONSTR | METHOD |


---
