# Supplementary material
Source: MDPI journal article supplement (https://www.mdpi.com/2071-1050/2/5/1182)
Supplement: s1 [file s1 › Sustainability_Altaweel_EtAl/Client/docs/anl/aida/client/actions/OpenCacheAction.html]

OpenCacheAction


---


|  |  |  |  |  |  |  |  |  |  |  |
| --- | --- | --- | --- | --- | --- | --- | --- | --- | --- | --- |
| |  |  |  |  |  |  |  |  | | --- | --- | --- | --- | --- | --- | --- | --- | | **Overview** | **Package** | **Class** | **Use** | **Tree** | **Deprecated** | **Index** | **Help** | | |  |
| PREV CLASS   **NEXT CLASS** | **FRAMES**    **NO FRAMES**     **All Classes** |
| SUMMARY: NESTED | FIELD | CONSTR | METHOD | DETAIL: FIELD | CONSTR | METHOD |


---


## anl.aida.client.actions Class OpenCacheAction

```
java.lang.Object
  javax.swing.AbstractAction
      saf.core.ui.actions.AbstractSAFAction<AIDAClient>
          anl.aida.client.actions.OpenCacheAction
```

**All Implemented Interfaces:**: java.awt.event.ActionListener, java.io.Serializable, java.lang.Cloneable, java.util.EventListener, javax.swing.Action, saf.core.ui.actions.ISAFAction<AIDAClient>

---

``` public class OpenCacheAction extends saf.core.ui.actions.AbstractSAFAction<AIDAClient> ```

Date: Feb 3, 2009 3:42:57 PM

**See Also:**: Serialized Form

---

| **Field Summary** | |
| --- | --- |

| **Fields inherited from class saf.core.ui.actions.AbstractSAFAction** |
| --- |
| `workspace` |

| **Fields inherited from class javax.swing.AbstractAction** |
| --- |
| `changeSupport, enabled` |

| **Fields inherited from interface javax.swing.Action** |
| --- |
| `ACCELERATOR_KEY, ACTION_COMMAND_KEY, DEFAULT, DISPLAYED_MNEMONIC_INDEX_KEY, LARGE_ICON_KEY, LONG_DESCRIPTION, MNEMONIC_KEY, NAME, SELECTED_KEY, SHORT_DESCRIPTION, SMALL_ICON` |


| **Constructor Summary** | |
| --- | --- |
| `OpenCacheAction()` |


| **Method Summary** | |
| --- | --- |
| `void` | `actionPerformed(java.awt.event.ActionEvent e)` |

| **Methods inherited from class saf.core.ui.actions.AbstractSAFAction** |
| --- |
| `initialize` |

| **Methods inherited from class javax.swing.AbstractAction** |
| --- |
| `addPropertyChangeListener, clone, firePropertyChange, getKeys, getPropertyChangeListeners, getValue, isEnabled, putValue, removePropertyChangeListener, setEnabled` |

| **Methods inherited from class java.lang.Object** |
| --- |
| `equals, finalize, getClass, hashCode, notify, notifyAll, toString, wait, wait, wait` |

| **Methods inherited from interface javax.swing.Action** |
| --- |
| `addPropertyChangeListener, getValue, isEnabled, putValue, removePropertyChangeListener, setEnabled` |

| **Constructor Detail** |
| --- |

### OpenCacheAction

```
public OpenCacheAction()
```


| **Method Detail** |
| --- |

### actionPerformed

```
public void actionPerformed(java.awt.event.ActionEvent e)
```


---


|  |  |  |  |  |  |  |  |  |  |  |
| --- | --- | --- | --- | --- | --- | --- | --- | --- | --- | --- |
| |  |  |  |  |  |  |  |  | | --- | --- | --- | --- | --- | --- | --- | --- | | **Overview** | **Package** | **Class** | **Use** | **Tree** | **Deprecated** | **Index** | **Help** | | |  |
| PREV CLASS   **NEXT CLASS** | **FRAMES**    **NO FRAMES**     **All Classes** |
| SUMMARY: NESTED | FIELD | CONSTR | METHOD | DETAIL: FIELD | CONSTR | METHOD |


---
