# Supplementary material
Source: MDPI journal article supplement (https://www.mdpi.com/2071-1050/2/5/1182)
Supplement: s1 [file s1 › Sustainability_Altaweel_EtAl/Client/docs/anl/aida/client/actions/package-frame.html]

anl.aida.client.actions


anl.aida.client.actions

|  |
| --- |
| Classes    OpenCacheAction   OpenTriggerDialog |
