# Supplementary material
Source: MDPI journal article supplement (https://www.mdpi.com/2071-1050/2/5/1182)
Supplement: s1 [file s1 › Sustainability_Altaweel_EtAl/Client/docs/anl/aida/client/AIDAClient.html]

AIDAClient


---


|  |  |  |  |  |  |  |  |  |  |  |
| --- | --- | --- | --- | --- | --- | --- | --- | --- | --- | --- |
| |  |  |  |  |  |  |  |  | | --- | --- | --- | --- | --- | --- | --- | --- | | **Overview** | **Package** | **Class** | **Use** | **Tree** | **Deprecated** | **Index** | **Help** | | |  |
| PREV CLASS   **NEXT CLASS** | **FRAMES**    **NO FRAMES**     **All Classes** |
| SUMMARY: NESTED | FIELD | CONSTR | METHOD | DETAIL: FIELD | CONSTR | METHOD |


---


## anl.aida.client Class AIDAClient

```
java.lang.Object
  anl.aida.client.AIDAClient
```

---

``` public class AIDAClient extends java.lang.Object ```

Date: Feb 3, 2009 3:22:37 PM

---

| **Field Summary** | |
| --- | --- |
| `private  Cache` | `cache` |
| `private static simphony.util.messages.MessageCenter` | `center` |
| `private  AIDAGui` | `gui` |


| **Constructor Summary** | |
| --- | --- |
| `AIDAClient()` |


| **Method Summary** | |
| --- | --- |
| `boolean` | `exit()`             Called when the client is exiting. |
| `(package private)  void` | `init(AIDAGui gui)` |
| `void` | `openCache(java.io.File file)`             Opens a cache from the specified file. |
| `void` | `openTriggerDialog()` |

| **Methods inherited from class java.lang.Object** |
| --- |
| `clone, equals, finalize, getClass, hashCode, notify, notifyAll, toString, wait, wait, wait` |

| **Field Detail** |
| --- |

### center

```
private static final simphony.util.messages.MessageCenter center
```

---


### gui

```
private AIDAGui gui
```

---


### cache

```
private Cache cache
```


| **Constructor Detail** |
| --- |

### AIDAClient

```
public AIDAClient()
```


| **Method Detail** |
| --- |

### init

```
void init(AIDAGui gui)
```

---


### openTriggerDialog

```
public void openTriggerDialog()
```

---


### openCache

```
public void openCache(java.io.File file)
```

:   Opens a cache from the specified file.

    :   **Parameters:**: `file` - the cache description file

---


### exit

```
public boolean exit()
```

:   Called when the client is exiting.

    :   **Returns:**: true if the client should exit, otherwise false.


---


|  |  |  |  |  |  |  |  |  |  |  |
| --- | --- | --- | --- | --- | --- | --- | --- | --- | --- | --- |
| |  |  |  |  |  |  |  |  | | --- | --- | --- | --- | --- | --- | --- | --- | | **Overview** | **Package** | **Class** | **Use** | **Tree** | **Deprecated** | **Index** | **Help** | | |  |
| PREV CLASS   **NEXT CLASS** | **FRAMES**    **NO FRAMES**     **All Classes** |
| SUMMARY: NESTED | FIELD | CONSTR | METHOD | DETAIL: FIELD | CONSTR | METHOD |


---
