# Supplementary material
Source: MDPI journal article supplement (https://www.mdpi.com/2071-1050/2/5/1182)
Supplement: s1 [file s1 › Sustainability_Altaweel_EtAl/Client/docs/anl/aida/client/AIDAClientConfigurator.html]

AIDAClientConfigurator


---


|  |  |  |  |  |  |  |  |  |  |  |
| --- | --- | --- | --- | --- | --- | --- | --- | --- | --- | --- |
| |  |  |  |  |  |  |  |  | | --- | --- | --- | --- | --- | --- | --- | --- | | **Overview** | **Package** | **Class** | **Use** | **Tree** | **Deprecated** | **Index** | **Help** | | |  |
| **PREV CLASS**   **NEXT CLASS** | **FRAMES**    **NO FRAMES**     **All Classes** |
| SUMMARY: NESTED | FIELD | CONSTR | METHOD | DETAIL: FIELD | CONSTR | METHOD |


---


## anl.aida.client Class AIDAClientConfigurator

```
java.lang.Object
  anl.aida.client.AIDAClientConfigurator
```

**All Implemented Interfaces:**: saf.core.ui.IAppConfigurator

---

``` public class AIDAClientConfigurator extends java.lang.Object implements saf.core.ui.IAppConfigurator ```

Date: Feb 3, 2009 3:24:33 PM

---

| **Field Summary** | |
| --- | --- |
| `private  AIDAClient` | `client` |
| `private  AIDAGui` | `gui` |


| **Constructor Summary** | |
| --- | --- |
| `AIDAClientConfigurator(AIDAClient client)` |


| **Method Summary** | |
| --- | --- |
| `void` | `createLayout(saf.core.ui.dock.DockingManager dockingManager)` |
| `void` | `fillBars(saf.core.ui.GUIBarManager guiBarManager)` |
| `void` | `postWindowClose()` |
| `void` | `postWindowOpen(saf.core.ui.ISAFDisplay display)` |
| `boolean` | `preWindowClose()` |
| `boolean` | `preWindowOpen(saf.core.ui.IWindowCustomizer customizer)` |

| **Methods inherited from class java.lang.Object** |
| --- |
| `clone, equals, finalize, getClass, hashCode, notify, notifyAll, toString, wait, wait, wait` |

| **Field Detail** |
| --- |

### client

```
private AIDAClient client
```

---


### gui

```
private AIDAGui gui
```


| **Constructor Detail** |
| --- |

### AIDAClientConfigurator

```
public AIDAClientConfigurator(AIDAClient client)
```


| **Method Detail** |
| --- |

### preWindowOpen

```
public boolean preWindowOpen(saf.core.ui.IWindowCustomizer customizer)
```

:   **Specified by:**: `preWindowOpen` in interface `saf.core.ui.IAppConfigurator`

---


### fillBars

```
public void fillBars(saf.core.ui.GUIBarManager guiBarManager)
```

:   **Specified by:**: `fillBars` in interface `saf.core.ui.IAppConfigurator`

---


### postWindowOpen

```
public void postWindowOpen(saf.core.ui.ISAFDisplay display)
```

:   **Specified by:**: `postWindowOpen` in interface `saf.core.ui.IAppConfigurator`

---


### preWindowClose

```
public boolean preWindowClose()
```

:   **Specified by:**: `preWindowClose` in interface `saf.core.ui.IAppConfigurator`

---


### postWindowClose

```
public void postWindowClose()
```

:   **Specified by:**: `postWindowClose` in interface `saf.core.ui.IAppConfigurator`

---


### createLayout

```
public void createLayout(saf.core.ui.dock.DockingManager dockingManager)
```

:   **Specified by:**: `createLayout` in interface `saf.core.ui.IAppConfigurator`


---


|  |  |  |  |  |  |  |  |  |  |  |
| --- | --- | --- | --- | --- | --- | --- | --- | --- | --- | --- |
| |  |  |  |  |  |  |  |  | | --- | --- | --- | --- | --- | --- | --- | --- | | **Overview** | **Package** | **Class** | **Use** | **Tree** | **Deprecated** | **Index** | **Help** | | |  |
| **PREV CLASS**   **NEXT CLASS** | **FRAMES**    **NO FRAMES**     **All Classes** |
| SUMMARY: NESTED | FIELD | CONSTR | METHOD | DETAIL: FIELD | CONSTR | METHOD |


---
