# Supplementary material
Source: MDPI journal article supplement (https://www.mdpi.com/2071-1050/2/5/1182)
Supplement: s1 [file s1 › Sustainability_Altaweel_EtAl/Client/docs/anl/aida/client/AIDAClientPlugin.html]

AIDAClientPlugin


---


|  |  |  |  |  |  |  |  |  |  |  |
| --- | --- | --- | --- | --- | --- | --- | --- | --- | --- | --- |
| |  |  |  |  |  |  |  |  | | --- | --- | --- | --- | --- | --- | --- | --- | | **Overview** | **Package** | **Class** | **Use** | **Tree** | **Deprecated** | **Index** | **Help** | | |  |
| **PREV CLASS**   **NEXT CLASS** | **FRAMES**    **NO FRAMES**     **All Classes** |
| SUMMARY: NESTED | FIELD | CONSTR | METHOD | DETAIL: FIELD | CONSTR | METHOD |


---


## anl.aida.client Class AIDAClientPlugin

```
java.lang.Object
  org.java.plugin.Plugin
      anl.aida.client.AIDAClientPlugin
```

**All Implemented Interfaces:**: saf.core.runtime.IApplicationRunnable

---

``` public class AIDAClientPlugin extends org.java.plugin.Plugin implements saf.core.runtime.IApplicationRunnable ```

SAF Plugin class that starts the AIDA Client.

---

| **Field Summary** | |
| --- | --- |
| `private static java.lang.String` | `TITLE` |
| `static java.lang.String` | `TITLE_PROPERTY_KEY` |

| **Fields inherited from class org.java.plugin.Plugin** |
| --- |
| `log` |


| **Constructor Summary** | |
| --- | --- |
| `AIDAClientPlugin()` |


| **Method Summary** | |
| --- | --- |
| `protected  void` | `doStart()` |
| `protected  void` | `doStop()` |
| `void` | `run(java.lang.String[] args)` |

| **Methods inherited from class org.java.plugin.Plugin** |
| --- |
| `getDescriptor, getManager, isActive, toString` |

| **Methods inherited from class java.lang.Object** |
| --- |
| `clone, equals, finalize, getClass, hashCode, notify, notifyAll, wait, wait, wait` |

| **Field Detail** |
| --- |

### TITLE\_PROPERTY\_KEY

```
public static final java.lang.String TITLE_PROPERTY_KEY
```

**See Also:**: Constant Field Values

---


### TITLE

```
private static final java.lang.String TITLE
```

**See Also:**: Constant Field Values


| **Constructor Detail** |
| --- |

### AIDAClientPlugin

```
public AIDAClientPlugin()
```


| **Method Detail** |
| --- |

### doStart

```
protected void doStart()
                throws java.lang.Exception
```

:   **Specified by:**: `doStart` in class `org.java.plugin.Plugin`
:   **Throws:**: `java.lang.Exception`

---


### doStop

```
protected void doStop()
               throws java.lang.Exception
```

:   **Specified by:**: `doStop` in class `org.java.plugin.Plugin`
:   **Throws:**: `java.lang.Exception`

---


### run

```
public void run(java.lang.String[] args)
```

:   **Specified by:**: `run` in interface `saf.core.runtime.IApplicationRunnable`


---


|  |  |  |  |  |  |  |  |  |  |  |
| --- | --- | --- | --- | --- | --- | --- | --- | --- | --- | --- |
| |  |  |  |  |  |  |  |  | | --- | --- | --- | --- | --- | --- | --- | --- | | **Overview** | **Package** | **Class** | **Use** | **Tree** | **Deprecated** | **Index** | **Help** | | |  |
| **PREV CLASS**   **NEXT CLASS** | **FRAMES**    **NO FRAMES**     **All Classes** |
| SUMMARY: NESTED | FIELD | CONSTR | METHOD | DETAIL: FIELD | CONSTR | METHOD |


---
