# Supplementary material
Source: MDPI journal article supplement (https://www.mdpi.com/2071-1050/2/5/1182)
Supplement: s1 [file s1 › Sustainability_Altaweel_EtAl/Client/docs/anl/aida/client/Cache.html]

Cache


---


|  |  |  |  |  |  |  |  |  |  |  |
| --- | --- | --- | --- | --- | --- | --- | --- | --- | --- | --- |
| |  |  |  |  |  |  |  |  | | --- | --- | --- | --- | --- | --- | --- | --- | | **Overview** | **Package** | **Class** | **Use** | **Tree** | **Deprecated** | **Index** | **Help** | | |  |
| **PREV CLASS**   **NEXT CLASS** | **FRAMES**    **NO FRAMES**     **All Classes** |
| SUMMARY: NESTED | FIELD | CONSTR | METHOD | DETAIL: FIELD | CONSTR | METHOD |


---


## anl.aida.client Class Cache

```
java.lang.Object
  anl.aida.client.Cache
```

---

``` public class Cache extends java.lang.Object ```

Encapsulates a Cache.

---

| **Field Summary** | |
| --- | --- |
| `private  java.io.File` | `cacheDirectory` |
| `private  java.util.Map<anl.aida.util.DateRange,CacheElement>` | `items` |
| `private  Keywords` | `keywords` |
| `private  java.io.File` | `luceneLocation` |
| `private  anl.aida.util.DateRangeProducer` | `ranger` |
| `private  int` | `totalDocs` |


| **Constructor Summary** | |
| --- | --- |
| `Cache(java.io.File luceneLocation, java.io.File cacheDirectory, anl.aida.util.DateRangeProducer ranger)`             Creates a cache. |


| **Method Summary** | |
| --- | --- |
| `void` | `add(java.lang.String keywordSet, java.lang.String keyword)`             Adds the specified keyword to the specified keyword set in this cache. |
| `void` | `addCacheElement(CacheElement item)`             Adds the specified CacheElement to this cache. |
| `java.lang.Iterable<CacheElement>` | `elements()`             Gets an iteratble over all the elements in this cache. |
| `java.io.File` | `getCacheDirectory()`             Gets the directory where the cache resides. |
| `CacheElement` | `getElement(anl.aida.util.DateRange range)`             Gets the element that covers the specified date range. |
| `CacheElement` | `getElement(int id)`             Gets the element by its numeric id. |
| `Keywords` | `getKeywords()`             Gets the keywords associated with this cache. |
| `java.io.File` | `getLuceneLocation()`             Gets the location of this cache's lucene index. |
| `anl.aida.util.DateRangeProducer` | `getRanger()`             Gets the DateRangeProducer that covers the date range interval of this Cache. |
| `int` | `getTotalDocs()`             Gets the total number of docs in this cache. |
| `void` | `setKeywords(Keywords keywords)`             Sets the keywords for this cache. |
| `int` | `size()`             Gets the number of cache elements in this cache. |

| **Methods inherited from class java.lang.Object** |
| --- |
| `clone, equals, finalize, getClass, hashCode, notify, notifyAll, toString, wait, wait, wait` |

| **Field Detail** |
| --- |

### luceneLocation

```
private java.io.File luceneLocation
```

---


### cacheDirectory

```
private java.io.File cacheDirectory
```

---


### items

```
private java.util.Map<anl.aida.util.DateRange,CacheElement> items
```

---


### ranger

```
private anl.aida.util.DateRangeProducer ranger
```

---


### totalDocs

```
private int totalDocs
```

---


### keywords

```
private Keywords keywords
```


| **Constructor Detail** |
| --- |

### Cache

```
public Cache(java.io.File luceneLocation,
             java.io.File cacheDirectory,
             anl.aida.util.DateRangeProducer ranger)
```

:   Creates a cache.

    **Parameters:**: `luceneLocation` - the location of the lucene index from which the cache was created: `ranger` - a DateRangeProducer that can produce the date ranges of the individual cache elements


| **Method Detail** |
| --- |

### getCacheDirectory

```
public java.io.File getCacheDirectory()
```

:   Gets the directory where the cache resides.

    :   **Returns:**: the directory where the cache resides.

---


### getLuceneLocation

```
public java.io.File getLuceneLocation()
```

:   Gets the location of this cache's lucene index.

    :   **Returns:**: the location of this cache's lucene index.

---


### getTotalDocs

```
public int getTotalDocs()
```

:   Gets the total number of docs in this cache.

    :   **Returns:**: the total number of docs in this cache.

---


### addCacheElement

```
public void addCacheElement(CacheElement item)
```

:   Adds the specified CacheElement to this cache.

    :   **Parameters:**: `item` - the element to add

---


### size

```
public int size()
```

:   Gets the number of cache elements in this cache.

    :   **Returns:**: the number of cache elements in this cache.

---


### getElement

```
public CacheElement getElement(int id)
```

:   Gets the element by its numeric id.

    :   **Parameters:**: `id` - the id of the element to get **Returns:**: the element by its numeric id.

---


### getElement

```
public CacheElement getElement(anl.aida.util.DateRange range)
```

:   Gets the element that covers the specified date range.

    :   **Parameters:**: `range` - the range of the element to get **Returns:**: the element that covers the specified date range.

---


### elements

```
public java.lang.Iterable<CacheElement> elements()
```

:   Gets an iteratble over all the elements in this cache.

    :   **Returns:**: an iteratble over all the elements in this cache.

---


### getRanger

```
public anl.aida.util.DateRangeProducer getRanger()
```

:   Gets the DateRangeProducer that covers the date range interval
    of this Cache.

    :   **Returns:**: the DateRangeProducer that covers the date range interval of this Cache.

---


### add

```
public void add(java.lang.String keywordSet,
                java.lang.String keyword)
```

:   Adds the specified keyword to the specified keyword set
    in this cache.

    :   **Parameters:**: `keywordSet` - the set to add the keyword to: `keyword` - the keyword to add

---


### getKeywords

```
public Keywords getKeywords()
```

:   Gets the keywords associated with this cache.

    :   **Returns:**: the keywords associated with this cache.

---


### setKeywords

```
public void setKeywords(Keywords keywords)
```

:   Sets the keywords for this cache.

    :   **Parameters:**: `keywords` - the new keywords for this cache


---


|  |  |  |  |  |  |  |  |  |  |  |
| --- | --- | --- | --- | --- | --- | --- | --- | --- | --- | --- |
| |  |  |  |  |  |  |  |  | | --- | --- | --- | --- | --- | --- | --- | --- | | **Overview** | **Package** | **Class** | **Use** | **Tree** | **Deprecated** | **Index** | **Help** | | |  |
| **PREV CLASS**   **NEXT CLASS** | **FRAMES**    **NO FRAMES**     **All Classes** |
| SUMMARY: NESTED | FIELD | CONSTR | METHOD | DETAIL: FIELD | CONSTR | METHOD |


---
