# Supplementary material
Source: MDPI journal article supplement (https://www.mdpi.com/2071-1050/2/5/1182)
Supplement: s1 [file s1 › Sustainability_Altaweel_EtAl/Client/docs/anl/aida/client/CacheElement.AllDocs.html]

CacheElement.AllDocs


---


|  |  |  |  |  |  |  |  |  |  |  |
| --- | --- | --- | --- | --- | --- | --- | --- | --- | --- | --- |
| |  |  |  |  |  |  |  |  | | --- | --- | --- | --- | --- | --- | --- | --- | | **Overview** | **Package** | **Class** | **Use** | **Tree** | **Deprecated** | **Index** | **Help** | | |  |
| **PREV CLASS**   **NEXT CLASS** | **FRAMES**    **NO FRAMES**     **All Classes** |
| SUMMARY: NESTED | FIELD | CONSTR | METHOD | DETAIL: FIELD | CONSTR | METHOD |


---


## anl.aida.client Class CacheElement.AllDocs

```
java.lang.Object
  anl.aida.client.CacheElement.AllDocs
```

**All Implemented Interfaces:**: CacheDocumentSet

**Enclosing class:**: CacheElement

---

``` private static class CacheElement.AllDocs extends java.lang.Object implements CacheDocumentSet ```

---

| **Field Summary** | |
| --- | --- |
| `private  Clusterer<anl.aida.core.DocumentID>` | `clusterer` |
| `private  CacheElement` | `element` |
| `private  DocSetID` | `id` |
| `private  DefaultDocumentsModel` | `model` |


| **Constructor Summary** | |
| --- | --- |
| `CacheElement.AllDocs(DocSetID id, CacheElement element)` |


| **Method Summary** | |
| --- | --- |
| `java.lang.Iterable<anl.aida.core.DocumentID>` | `documents()`             Gets the document ids of all the docs this set contains. |
| `Clusterer<anl.aida.core.DocumentID>` | `getClusterer()`             Gets the Clusterer that should be used to Cluster this document set. |
| `int` | `getDocumentCount()`             Gets the number of documents in this CacheDocumentSet. |
| `DocumentsModel` | `getDocumentsModel()`             Gets a DocumentsModel for the documents in this CacheDocumentSet. |
| `DocSetID` | `getId()`             Gets the id of this document set. |
| `anl.aida.core.KeywordGenerator` | `getKeyWordGenerator()`             Gets a keyword generator that can be used to generate keywords for this doc set. |
| `java.lang.String` | `getLabel()`             Gets a descriptive label for this CacheDocumentSet. |
| `CacheElement` | `getParent()`             Gets the CacheElement that is the parent of this CacheDocumentSet. |
| `anl.aida.core.ScoredTermsCollection` | `getSTC()`             Gets the ScoredTermsCollection associated with this CacheDocumentSet. |
| `int` | `getTermCount()`             Gets the number of terms in this CacheDocumentSet. |
| `java.lang.String` | `getTimeStampAsString()`             Gets the timestamp of this CacheDocumentSet. |

| **Methods inherited from class java.lang.Object** |
| --- |
| `clone, equals, finalize, getClass, hashCode, notify, notifyAll, toString, wait, wait, wait` |

| **Field Detail** |
| --- |

### id

```
private DocSetID id
```

---


### element

```
private CacheElement element
```

---


### clusterer

```
private Clusterer<anl.aida.core.DocumentID> clusterer
```

---


### model

```
private DefaultDocumentsModel model
```


| **Constructor Detail** |
| --- |

### CacheElement.AllDocs

```
CacheElement.AllDocs(DocSetID id,
                     CacheElement element)
```


| **Method Detail** |
| --- |

### getLabel

```
public java.lang.String getLabel()
```

:   **Description copied from interface: `CacheDocumentSet`**
:   Gets a descriptive label for this CacheDocumentSet.

    :   **Specified by:**: `getLabel` in interface `CacheDocumentSet`
    :   **Returns:**: a descriptive label for this CacheDocumentSet.

---


### getId

```
public DocSetID getId()
```

:   **Description copied from interface: `CacheDocumentSet`**
:   Gets the id of this document set.

    :   **Specified by:**: `getId` in interface `CacheDocumentSet`
    :   **Returns:**: the id of this document set.

---


### documents

```
public java.lang.Iterable<anl.aida.core.DocumentID> documents()
```

:   Gets the document ids of all the docs this set contains.

    :   **Specified by:**: `documents` in interface `CacheDocumentSet`
    :   **Returns:**: the document ids of all the docs this set contains.

---


### getClusterer

```
public Clusterer<anl.aida.core.DocumentID> getClusterer()
```

:   Gets the Clusterer that should be used to Cluster this document set.

    :   **Specified by:**: `getClusterer` in interface `CacheDocumentSet`
    :   **Returns:**: the Clusterer that should be used to Cluster this document set.

---


### getDocumentCount

```
public int getDocumentCount()
```

:   **Description copied from interface: `CacheDocumentSet`**
:   Gets the number of documents in this CacheDocumentSet.

    :   **Specified by:**: `getDocumentCount` in interface `CacheDocumentSet`
    :   **Returns:**: the number of documents in this CacheDocumentSet.

---


### getTermCount

```
public int getTermCount()
```

:   **Description copied from interface: `CacheDocumentSet`**
:   Gets the number of terms in this CacheDocumentSet.

    :   **Specified by:**: `getTermCount` in interface `CacheDocumentSet`
    :   **Returns:**: the number of terms in this CacheDocumentSet.

---


### getTimeStampAsString

```
public java.lang.String getTimeStampAsString()
```

:   **Description copied from interface: `CacheDocumentSet`**
:   Gets the timestamp of this CacheDocumentSet.

    :   **Specified by:**: `getTimeStampAsString` in interface `CacheDocumentSet`
    :   **Returns:**: the timestamp of this CacheDocumentSet.

---


### getKeyWordGenerator

```
public anl.aida.core.KeywordGenerator getKeyWordGenerator()
```

:   **Description copied from interface: `CacheDocumentSet`**
:   Gets a keyword generator that can be used to generate
    keywords for this doc set.

    :   **Specified by:**: `getKeyWordGenerator` in interface `CacheDocumentSet`
    :   **Returns:**: a keyword generator that can be used to generate keywords for this doc set.

---


### getSTC

```
public anl.aida.core.ScoredTermsCollection getSTC()
```

:   **Description copied from interface: `CacheDocumentSet`**
:   Gets the ScoredTermsCollection associated with this CacheDocumentSet.

    :   **Specified by:**: `getSTC` in interface `CacheDocumentSet`
    :   **Returns:**: the ScoredTermsCollection associated with this CacheDocumentSet.

---


### getDocumentsModel

```
public DocumentsModel getDocumentsModel()
```

:   **Description copied from interface: `CacheDocumentSet`**
:   Gets a DocumentsModel for the documents in this CacheDocumentSet.

    :   **Specified by:**: `getDocumentsModel` in interface `CacheDocumentSet`
    :   **Returns:**: a DocumentsModel for the documents in this CacheDocumentSet.

---


### getParent

```
public CacheElement getParent()
```

:   Gets the CacheElement that is the parent of this CacheDocumentSet.

    :   **Specified by:**: `getParent` in interface `CacheDocumentSet`
    :   **Returns:**: the CacheElement that is the parent of this CacheDocumentSet.


---


|  |  |  |  |  |  |  |  |  |  |  |
| --- | --- | --- | --- | --- | --- | --- | --- | --- | --- | --- |
| |  |  |  |  |  |  |  |  | | --- | --- | --- | --- | --- | --- | --- | --- | | **Overview** | **Package** | **Class** | **Use** | **Tree** | **Deprecated** | **Index** | **Help** | | |  |
| **PREV CLASS**   **NEXT CLASS** | **FRAMES**    **NO FRAMES**     **All Classes** |
| SUMMARY: NESTED | FIELD | CONSTR | METHOD | DETAIL: FIELD | CONSTR | METHOD |


---
