# Supplementary material
Source: MDPI journal article supplement (https://www.mdpi.com/2071-1050/2/5/1182)
Supplement: s1 [file s1 › Sustainability_Altaweel_EtAl/Client/docs/anl/aida/client/CacheElement.DIIter.html]

CacheElement.DIIter


---


|  |  |  |  |  |  |  |  |  |  |  |
| --- | --- | --- | --- | --- | --- | --- | --- | --- | --- | --- |
| |  |  |  |  |  |  |  |  | | --- | --- | --- | --- | --- | --- | --- | --- | | **Overview** | **Package** | **Class** | **Use** | **Tree** | **Deprecated** | **Index** | **Help** | | |  |
| **PREV CLASS**   **NEXT CLASS** | **FRAMES**    **NO FRAMES**     **All Classes** |
| SUMMARY: NESTED | FIELD | CONSTR | METHOD | DETAIL: FIELD | CONSTR | METHOD |


---


## anl.aida.client Class CacheElement.DIIter

```
java.lang.Object
  anl.aida.client.CacheElement.DIIter
```

**All Implemented Interfaces:**: java.lang.Iterable<anl.aida.core.DocumentID>, java.util.Iterator<anl.aida.core.DocumentID>

**Enclosing class:**: CacheElement

---

``` private static class CacheElement.DIIter extends java.lang.Object implements java.lang.Iterable<anl.aida.core.DocumentID>, java.util.Iterator<anl.aida.core.DocumentID> ```

---

| **Field Summary** | |
| --- | --- |
| `private  java.util.Iterator<anl.aida.core.MIFSDocument>` | `iter` |


| **Constructor Summary** | |
| --- | --- |
| `CacheElement.DIIter(java.util.Iterator<anl.aida.core.MIFSDocument> iter)` |


| **Method Summary** | |
| --- | --- |
| `boolean` | `hasNext()` |
| `java.util.Iterator<anl.aida.core.DocumentID>` | `iterator()` |
| `anl.aida.core.DocumentID` | `next()` |
| `void` | `remove()` |

| **Methods inherited from class java.lang.Object** |
| --- |
| `clone, equals, finalize, getClass, hashCode, notify, notifyAll, toString, wait, wait, wait` |

| **Field Detail** |
| --- |

### iter

```
private java.util.Iterator<anl.aida.core.MIFSDocument> iter
```


| **Constructor Detail** |
| --- |

### CacheElement.DIIter

```
public CacheElement.DIIter(java.util.Iterator<anl.aida.core.MIFSDocument> iter)
```


| **Method Detail** |
| --- |

### iterator

```
public java.util.Iterator<anl.aida.core.DocumentID> iterator()
```

:   **Specified by:**: `iterator` in interface `java.lang.Iterable<anl.aida.core.DocumentID>`

---


### hasNext

```
public boolean hasNext()
```

:   **Specified by:**: `hasNext` in interface `java.util.Iterator<anl.aida.core.DocumentID>`

---


### next

```
public anl.aida.core.DocumentID next()
```

:   **Specified by:**: `next` in interface `java.util.Iterator<anl.aida.core.DocumentID>`

---


### remove

```
public void remove()
```

:   **Specified by:**: `remove` in interface `java.util.Iterator<anl.aida.core.DocumentID>`


---


|  |  |  |  |  |  |  |  |  |  |  |
| --- | --- | --- | --- | --- | --- | --- | --- | --- | --- | --- |
| |  |  |  |  |  |  |  |  | | --- | --- | --- | --- | --- | --- | --- | --- | | **Overview** | **Package** | **Class** | **Use** | **Tree** | **Deprecated** | **Index** | **Help** | | |  |
| **PREV CLASS**   **NEXT CLASS** | **FRAMES**    **NO FRAMES**     **All Classes** |
| SUMMARY: NESTED | FIELD | CONSTR | METHOD | DETAIL: FIELD | CONSTR | METHOD |


---
