# Supplementary material
Source: MDPI journal article supplement (https://www.mdpi.com/2071-1050/2/5/1182)
Supplement: s1 [file s1 › Sustainability_Altaweel_EtAl/Client/docs/anl/aida/client/CacheElement.html]

CacheElement


---


|  |  |  |  |  |  |  |  |  |  |  |
| --- | --- | --- | --- | --- | --- | --- | --- | --- | --- | --- |
| |  |  |  |  |  |  |  |  | | --- | --- | --- | --- | --- | --- | --- | --- | | **Overview** | **Package** | **Class** | **Use** | **Tree** | **Deprecated** | **Index** | **Help** | | |  |
| **PREV CLASS**   **NEXT CLASS** | **FRAMES**    **NO FRAMES**     **All Classes** |
| SUMMARY: NESTED | FIELD | CONSTR | METHOD | DETAIL: FIELD | CONSTR | METHOD |


---


## anl.aida.client Class CacheElement

```
java.lang.Object
  anl.aida.client.CacheElement
```

---

``` public class CacheElement extends java.lang.Object ```

Encapsulates details about a timestamped section of the cache.

---

| **Nested Class Summary** | |
| --- | --- |
| `private static class` | `CacheElement.AllDocs` |
| `private static class` | `CacheElement.DIIter` |


| **Field Summary** | |
| --- | --- |
| `private static simphony.util.messages.MessageCenter` | `center` |
| `private  java.util.List<CacheDocumentSet>` | `docSets` |
| `private  anl.aida.core.STCHeader` | `header` |
| `private  int` | `id` |
| `private  anl.aida.core.KeywordGenerator` | `keyGen` |
| `private  Keywords` | `keywords` |
| `private  anl.aida.core.ScoredTermsCollection` | `stc` |
| `private  java.io.File` | `stcLocation` |
| `static java.lang.String` | `SV_FILES_DIR` |
| `private  anl.aida.sv.SemanticVectorStore` | `svStore` |


| **Constructor Summary** | |
| --- | --- |
| `CacheElement(int id, java.io.File stcLocation, anl.aida.core.STCHeader header)` |


| **Method Summary** | |
| --- | --- |
| `void` | `addDocumentSet(CacheDocumentSet set)` |
| `java.lang.Iterable<CacheDocumentSet>` | `documentSets()` |
| `int` | `getDocumentCount()` |
| `CacheDocumentSet` | `getDocumentSet(int index)`             Gets the document set at the specified index. |
| `int` | `getDocumentSetCount()` |
| `anl.aida.core.STCHeader` | `getHeader()`             Gets the header associated with this cache element. |
| `int` | `getID()` |
| `anl.aida.core.KeywordGenerator` | `getKeywordGenerator()` |
| `Keywords` | `getKeywords()`             Gets the keywords for this CacheElement. |
| `anl.aida.core.ScoredTermsCollection` | `getSTC()` |
| `java.io.File` | `getSTCLocation()` |
| `private  java.io.File[]` | `getSVFiles(java.io.File stcLoc, anl.aida.core.ScoredTermsCollection stc)` |
| `anl.aida.sv.SemanticVectorStore` | `getSVS()` |
| `int` | `getTermCount()` |
| `private  void` | `initSTC()` |
| `private  void` | `initSV()` |
| `void` | `release()`             Releases any resources (STC etc.) acquired by this CacheElement. |
| `void` | `setKeyword(Keywords keywords)`             Sets the keywords for this cache element. |

| **Methods inherited from class java.lang.Object** |
| --- |
| `clone, equals, finalize, getClass, hashCode, notify, notifyAll, toString, wait, wait, wait` |

| **Field Detail** |
| --- |

### center

```
private static final simphony.util.messages.MessageCenter center
```

---


### SV\_FILES\_DIR

```
public static final java.lang.String SV_FILES_DIR
```

**See Also:**: Constant Field Values

---


### stcLocation

```
private java.io.File stcLocation
```

---


### header

```
private anl.aida.core.STCHeader header
```

---


### stc

```
private anl.aida.core.ScoredTermsCollection stc
```

---


### keyGen

```
private anl.aida.core.KeywordGenerator keyGen
```

---


### svStore

```
private anl.aida.sv.SemanticVectorStore svStore
```

---


### id

```
private int id
```

---


### keywords

```
private Keywords keywords
```

---


### docSets

```
private java.util.List<CacheDocumentSet> docSets
```


| **Constructor Detail** |
| --- |

### CacheElement

```
public CacheElement(int id,
                    java.io.File stcLocation,
                    anl.aida.core.STCHeader header)
```


| **Method Detail** |
| --- |

### getKeywords

```
public Keywords getKeywords()
```

:   Gets the keywords for this CacheElement. This may contain
    keywords with no docs in this element.

    :   **Returns:**: the keywords for this CacheElement. This may contain keywords with no docs in this element.

---


### setKeyword

```
public void setKeyword(Keywords keywords)
```

:   Sets the keywords for this cache element.

    :   **Parameters:**: `keywords` - the new keywords

---


### getDocumentSet

```
public CacheDocumentSet getDocumentSet(int index)
```

:   Gets the document set at the specified index.

    :   **Parameters:**: `index` - the index **Returns:**: the document set at the specified index.

---


### getHeader

```
public anl.aida.core.STCHeader getHeader()
```

:   Gets the header associated with this cache element.

    :   **Returns:**: the header associated with this cache element.

---


### release

```
public void release()
```

:   Releases any resources (STC etc.) acquired by this
    CacheElement.

---


### initSTC

```
private void initSTC()
```

---


### initSV

```
private void initSV()
```

---


### getID

```
public int getID()
```

---


### getSTC

```
public anl.aida.core.ScoredTermsCollection getSTC()
```

---


### getSVS

```
public anl.aida.sv.SemanticVectorStore getSVS()
```

---


### getKeywordGenerator

```
public anl.aida.core.KeywordGenerator getKeywordGenerator()
```

---


### documentSets

```
public java.lang.Iterable<CacheDocumentSet> documentSets()
```

---


### addDocumentSet

```
public void addDocumentSet(CacheDocumentSet set)
```

---


### getDocumentSetCount

```
public int getDocumentSetCount()
```

---


### getSVFiles

```
private java.io.File[] getSVFiles(java.io.File stcLoc,
                                  anl.aida.core.ScoredTermsCollection stc)
                           throws java.io.IOException
```

:   **Throws:**: `java.io.IOException`

---


### getDocumentCount

```
public int getDocumentCount()
```

---


### getTermCount

```
public int getTermCount()
```

---


### getSTCLocation

```
public java.io.File getSTCLocation()
```


---


|  |  |  |  |  |  |  |  |  |  |  |
| --- | --- | --- | --- | --- | --- | --- | --- | --- | --- | --- |
| |  |  |  |  |  |  |  |  | | --- | --- | --- | --- | --- | --- | --- | --- | | **Overview** | **Package** | **Class** | **Use** | **Tree** | **Deprecated** | **Index** | **Help** | | |  |
| **PREV CLASS**   **NEXT CLASS** | **FRAMES**    **NO FRAMES**     **All Classes** |
| SUMMARY: NESTED | FIELD | CONSTR | METHOD | DETAIL: FIELD | CONSTR | METHOD |


---
