# Supplementary material
Source: MDPI journal article supplement (https://www.mdpi.com/2071-1050/2/5/1182)
Supplement: s1 [file s1 › Sustainability_Altaweel_EtAl/Client/docs/anl/aida/client/class-use/Cache.html]

Uses of Class anl.aida.client.Cache


---


|  |  |  |  |  |  |  |  |  |  |  |
| --- | --- | --- | --- | --- | --- | --- | --- | --- | --- | --- |
| |  |  |  |  |  |  |  |  | | --- | --- | --- | --- | --- | --- | --- | --- | | **Overview** | **Package** | **Class** | **Use** | **Tree** | **Deprecated** | **Index** | **Help** | | |  |
| PREV   NEXT | **FRAMES**    **NO FRAMES**     **All Classes** |


---


## **Uses of Class anl.aida.client.Cache**

| Packages that use Cache | |
| --- | --- |
| **anl.aida.client** |  |
| **anl.aida.client.gui** |  |
| **anl.aida.client.io** |  |
| **anl.aida.client.net** |  |
| **anl.aida.plot** |  |
| **anl.aida.query** |  |
| **anl.aida.viz3d** |  |

| Uses of Cache in anl.aida.client | |
| --- | --- |

| Fields in anl.aida.client declared as Cache | |
| --- | --- |
| `private  Cache` | `AIDAClient.cache` |

| Uses of Cache in anl.aida.client.gui | |
| --- | --- |

| Fields in anl.aida.client.gui declared as Cache | |
| --- | --- |
| `private  Cache` | `TriggerRunnerWorker.cache` |
| `private  Cache` | `TriggerPanel.cache` |
| `private  Cache` | `CreateTSWorker.cache` |
| `private  Cache` | `CacheTSPanel.cache` |
| `private  Cache` | `AIDAGui.cache` |

| Methods in anl.aida.client.gui with parameters of type Cache | |
| --- | --- |
| `void` | `TriggerPanel.init(java.util.List<Trigger> triggers, Cache cache)` |
| `void` | `TriggerDialog.init(java.util.List<Trigger> triggers, Cache cache)` |
| `void` | `AIDAGui.produceOutput(Cache cache, VizPropertyBean bean, TSConceptGraphs graphs)` |
| `void` | `CacheTSPanel.reset(Cache cache)` |
| `void` | `CacheTreePanel.resetCache(Cache cache)` |
| `void` | `CachePanel.resetCache(Cache cache)` |
| `void` | `AIDAGui.resetCache(Cache cache)` |

| Constructors in anl.aida.client.gui with parameters of type Cache | |
| --- | --- |
| `CreateTSWorker(java.util.Collection<? extends Keyword> keywords, Cache cache, java.lang.Iterable<anl.aida.util.DateRange> ranges, javax.swing.JPanel panel)` |
| `TriggerRunnerWorker(Trigger trigger, Cache cache, javax.swing.JTextArea area)` |

| Uses of Cache in anl.aida.client.io | |
| --- | --- |

| Methods in anl.aida.client.io that return Cache | |
| --- | --- |
| `Cache` | `CacheFileReader.read(java.io.File file)` |

| Uses of Cache in anl.aida.client.net | |
| --- | --- |

| Fields in anl.aida.client.net declared as Cache | |
| --- | --- |
| `protected  Cache` | `TSConceptGraphs.cache` |

| Constructors in anl.aida.client.net with parameters of type Cache | |
| --- | --- |
| `NetworkOutputter(Cache cache, VizPropertyBean bean, TSConceptGraphs graphs)`             Constructor for creating network data output files. |
| `TSConceptGraphs(Cache cache, VizPropertyBean bean)` |

| Uses of Cache in anl.aida.plot | |
| --- | --- |

| Methods in anl.aida.plot with parameters of type Cache | |
| --- | --- |
| `static CacheTimeSeriesParams` | `CacheTimeSeriesParams.createParams(Cache cache, java.util.Collection<? extends Keyword> keywords, java.lang.Iterable<anl.aida.util.DateRange> ranges, ProgressListener<anl.aida.util.DateRange>... listeners)` |
| `private  void` | `CacheTimeSeriesParams.init(Cache cache, java.util.Collection<? extends Keyword> keywords, java.lang.Iterable<anl.aida.util.DateRange> ranges)` |

| Uses of Cache in anl.aida.query | |
| --- | --- |

| Fields in anl.aida.query declared as Cache | |
| --- | --- |
| `private  Cache` | `Frame.cache` |

| Methods in anl.aida.query that return Cache | |
| --- | --- |
| `Cache` | `Frame.getCache()` |

| Methods in anl.aida.query with parameters of type Cache | |
| --- | --- |
| `TriggerResult` | `Trigger.run(Cache cache, TriggerUpdateListener listener)` |
| `void` | `QueryRunner.run(java.lang.String query, Cache cache)` |

| Constructors in anl.aida.query with parameters of type Cache | |
| --- | --- |
| `Frame(Cache cache, CacheElement currentElement)` |

| Uses of Cache in anl.aida.viz3d | |
| --- | --- |

| Fields in anl.aida.viz3d declared as Cache | |
| --- | --- |
| `private  Cache` | `Viz3DTests.cache` |
| `private  Cache` | `NodeSelector.cache` |

| Constructors in anl.aida.viz3d with parameters of type Cache | |
| --- | --- |
| `Canvas3D(Cache cache)` |
| `GraphRenderer(Cache cache, ConceptGraph<TermNode> graph, anl.aida.util.DateRange initRange)` |
| `NodeSelector(Canvas3D canvas, Cache cache)` |

---


|  |  |  |  |  |  |  |  |  |  |  |
| --- | --- | --- | --- | --- | --- | --- | --- | --- | --- | --- |
| |  |  |  |  |  |  |  |  | | --- | --- | --- | --- | --- | --- | --- | --- | | **Overview** | **Package** | **Class** | **Use** | **Tree** | **Deprecated** | **Index** | **Help** | | |  |
| PREV   NEXT | **FRAMES**    **NO FRAMES**     **All Classes** |


---
