# Supplementary material
Source: MDPI journal article supplement (https://www.mdpi.com/2071-1050/2/5/1182)
Supplement: s1 [file s1 › Sustainability_Altaweel_EtAl/Client/docs/anl/aida/client/class-use/CacheDocumentSet.html]

Uses of Interface anl.aida.client.CacheDocumentSet


---


|  |  |  |  |  |  |  |  |  |  |  |
| --- | --- | --- | --- | --- | --- | --- | --- | --- | --- | --- |
| |  |  |  |  |  |  |  |  | | --- | --- | --- | --- | --- | --- | --- | --- | | **Overview** | **Package** | **Class** | **Use** | **Tree** | **Deprecated** | **Index** | **Help** | | |  |
| PREV   NEXT | **FRAMES**    **NO FRAMES**     **All Classes** |


---


## **Uses of Interface anl.aida.client.CacheDocumentSet**

| Packages that use CacheDocumentSet | |
| --- | --- |
| **anl.aida.client** |  |
| **anl.aida.client.gui** |  |

| Uses of CacheDocumentSet in anl.aida.client | |
| --- | --- |

| Classes in anl.aida.client that implement CacheDocumentSet | |
| --- | --- |
| `private static class` | `CacheElement.AllDocs` |
| `class` | `TempCacheDocSet`             A temporary cache document set that represents some subset of documents from a CacheElement. |
| `class` | `WrappedDocSet`             CacheDocumentSet that delegates most of its methods to another wrapped DocumentSet. |

| Fields in anl.aida.client declared as CacheDocumentSet | |
| --- | --- |
| `private  CacheDocumentSet` | `WrappedDocSet.set` |

| Fields in anl.aida.client with type parameters of type CacheDocumentSet | |
| --- | --- |
| `private  java.util.List<CacheDocumentSet>` | `CacheElement.docSets` |

| Methods in anl.aida.client that return CacheDocumentSet | |
| --- | --- |
| `CacheDocumentSet` | `CacheElement.getDocumentSet(int index)`             Gets the document set at the specified index. |

| Methods in anl.aida.client that return types with arguments of type CacheDocumentSet | |
| --- | --- |
| `java.lang.Iterable<CacheDocumentSet>` | `CacheElement.documentSets()` |

| Methods in anl.aida.client with parameters of type CacheDocumentSet | |
| --- | --- |
| `void` | `CacheElement.addDocumentSet(CacheDocumentSet set)` |

| Constructors in anl.aida.client with parameters of type CacheDocumentSet | |
| --- | --- |
| `WrappedDocSet(DocSetID id, java.lang.String label, CacheDocumentSet set)` |

| Uses of CacheDocumentSet in anl.aida.client.gui | |
| --- | --- |

| Fields in anl.aida.client.gui declared as CacheDocumentSet | |
| --- | --- |
| `private  CacheDocumentSet` | `DocSetNode.docSet` |
| `private  CacheDocumentSet` | `ConceptPanel.docSet` |

| Fields in anl.aida.client.gui with type parameters of type CacheDocumentSet | |
| --- | --- |
| `private  java.util.Map<DocSetID,CacheDocumentSet>` | `DocsTabPanel.setMap` |

| Methods in anl.aida.client.gui that return CacheDocumentSet | |
| --- | --- |
| `CacheDocumentSet` | `AIDAGui.addDocumentSet(java.lang.String name, CacheDocumentSet set)`             Adds a documents set to the cache tree. |
| `CacheDocumentSet` | `DocSetNode.getDocumentSet()` |

| Methods in anl.aida.client.gui with parameters of type CacheDocumentSet | |
| --- | --- |
| `void` | `CacheTreePanel.addCacheDocumentSet(CacheDocumentSet set)` |
| `void` | `CachePanel.addCacheDocumentSet(CacheDocumentSet set)` |
| `void` | `DocsTabPanel.addDocs(java.lang.String title, CacheDocumentSet docSet)`             Adds a documents view with the specified title using the specified model. |
| `CacheDocumentSet` | `AIDAGui.addDocumentSet(java.lang.String name, CacheDocumentSet set)`             Adds a documents set to the cache tree. |
| `void` | `CachePanel.docSetSelected(CacheDocumentSet set)` |
| `void` | `AIDAGui.loadDocs(java.lang.String title, CacheDocumentSet docSet)`             Loads a CacheDocumentSet into the documents view. |
| `void` | `ConceptPanel.reset(CacheDocumentSet set)`             Reset for new cache doc set. |
| `void` | `ClusterPanel.reset(CacheDocumentSet set)` |
| `void` | `CachePropsPanel.reset(CacheDocumentSet docSet)` |

| Constructors in anl.aida.client.gui with parameters of type CacheDocumentSet | |
| --- | --- |
| `DocSetNode(CacheDocumentSet docSet)` |

---


|  |  |  |  |  |  |  |  |  |  |  |
| --- | --- | --- | --- | --- | --- | --- | --- | --- | --- | --- |
| |  |  |  |  |  |  |  |  | | --- | --- | --- | --- | --- | --- | --- | --- | | **Overview** | **Package** | **Class** | **Use** | **Tree** | **Deprecated** | **Index** | **Help** | | |  |
| PREV   NEXT | **FRAMES**    **NO FRAMES**     **All Classes** |


---
