# Supplementary material
Source: MDPI journal article supplement (https://www.mdpi.com/2071-1050/2/5/1182)
Supplement: s1 [file s1 › Sustainability_Altaweel_EtAl/Client/docs/anl/aida/client/class-use/CacheElement.html]

Uses of Class anl.aida.client.CacheElement


---


|  |  |  |  |  |  |  |  |  |  |  |
| --- | --- | --- | --- | --- | --- | --- | --- | --- | --- | --- |
| |  |  |  |  |  |  |  |  | | --- | --- | --- | --- | --- | --- | --- | --- | | **Overview** | **Package** | **Class** | **Use** | **Tree** | **Deprecated** | **Index** | **Help** | | |  |
| PREV   NEXT | **FRAMES**    **NO FRAMES**     **All Classes** |


---


## **Uses of Class anl.aida.client.CacheElement**

| Packages that use CacheElement | |
| --- | --- |
| **anl.aida.algo** |  |
| **anl.aida.client** |  |
| **anl.aida.client.doc** |  |
| **anl.aida.client.gui** |  |
| **anl.aida.client.io** |  |
| **anl.aida.client.net** |  |
| **anl.aida.query** |  |

| Uses of CacheElement in anl.aida.algo | |
| --- | --- |

| Methods in anl.aida.algo with parameters of type CacheElement | |
| --- | --- |
| `ConceptGenerator` | `SVConceptGeneratorProducer.createGenerator(CacheElement element)` |
| `ConceptGenerator` | `KeywordsConceptGeneratorProducer.createGenerator(CacheElement element)` |
| `ConceptGenerator` | `ConceptGeneratorProducer.createGenerator(CacheElement element)`             Creates a concept generator, optionally using the cache element. |

| Uses of CacheElement in anl.aida.client | |
| --- | --- |

| Fields in anl.aida.client declared as CacheElement | |
| --- | --- |
| `private  CacheElement` | `TempCacheDocSet.element` |
| `private  CacheElement` | `ShowDocViewOp.element` |
| `private  CacheElement` | `CacheElement.AllDocs.element` |

| Fields in anl.aida.client with type parameters of type CacheElement | |
| --- | --- |
| `private  java.util.Map<anl.aida.util.DateRange,CacheElement>` | `Cache.items` |

| Methods in anl.aida.client that return CacheElement | |
| --- | --- |
| `CacheElement` | `Cache.getElement(anl.aida.util.DateRange range)`             Gets the element that covers the specified date range. |
| `CacheElement` | `Cache.getElement(int id)`             Gets the element by its numeric id. |
| `CacheElement` | `WrappedDocSet.getParent()`             Gets the CacheElement that is the parent of this CacheDocumentSet. |
| `CacheElement` | `CacheDocumentSet.getParent()`             Gets the CacheElement that is the parent of this CacheDocumentSet. |
| `CacheElement` | `TempCacheDocSet.getParent()`             Gets the CacheElement that is the parent of this CacheDocumentSet. |
| `CacheElement` | `CacheElement.AllDocs.getParent()`             Gets the CacheElement that is the parent of this CacheDocumentSet. |

| Methods in anl.aida.client that return types with arguments of type CacheElement | |
| --- | --- |
| `java.lang.Iterable<CacheElement>` | `Cache.elements()`             Gets an iteratble over all the elements in this cache. |

| Methods in anl.aida.client with parameters of type CacheElement | |
| --- | --- |
| `void` | `Cache.addCacheElement(CacheElement item)`             Adds the specified CacheElement to this cache. |
| `void` | `ShowDocViewOp.setElement(CacheElement element)` |

| Constructors in anl.aida.client with parameters of type CacheElement | |
| --- | --- |
| `CacheElement.AllDocs(DocSetID id, CacheElement element)` |
| `ShowDocViewOp(AIDAGui gui, CacheElement element)` |
| `TempCacheDocSet(CacheElement element, java.util.List<anl.aida.core.DocumentID> selectedItems)` |

| Uses of CacheElement in anl.aida.client.doc | |
| --- | --- |

| Fields in anl.aida.client.doc declared as CacheElement | |
| --- | --- |
| `protected  CacheElement` | `AbstractDocumentsModel.element` |

| Constructors in anl.aida.client.doc with parameters of type CacheElement | |
| --- | --- |
| `AbstractDocumentsModel(DocSetID id, CacheElement element)` |
| `DefaultDocumentsModel(DocSetID id, CacheElement element)` |
| `SubsetDocumentsModel(DocSetID id, CacheElement element, java.util.List<anl.aida.core.DocumentID> docs)` |

| Uses of CacheElement in anl.aida.client.gui | |
| --- | --- |

| Fields in anl.aida.client.gui declared as CacheElement | |
| --- | --- |
| `private  CacheElement` | `AIDAGui.cElement` |
| `private  CacheElement` | `AIDAGui.SearchWorker.element` |
| `private  CacheElement` | `CacheElementNode.item` |
| `private  CacheElement` | `CacheTSPanel.selectedElement` |

| Methods in anl.aida.client.gui that return CacheElement | |
| --- | --- |
| `CacheElement` | `CacheTreePanel.getElement(int id)` |
| `CacheElement` | `CachePanel.getElement(int id)` |
| `CacheElement` | `CacheElementNode.getItem()` |

| Methods in anl.aida.client.gui with parameters of type CacheElement | |
| --- | --- |
| `void` | `AIDAGui.cacheElementSelected(CacheElement element)`             Called when a cache element is selected. |

| Constructors in anl.aida.client.gui with parameters of type CacheElement | |
| --- | --- |
| `CacheElementNode(CacheElement item)` |

| Uses of CacheElement in anl.aida.client.io | |
| --- | --- |

| Fields in anl.aida.client.io with type parameters of type CacheElement | |
| --- | --- |
| `private  java.util.List<CacheElement>` | `CacheFileReader.elements` |

| Uses of CacheElement in anl.aida.client.net | |
| --- | --- |

| Fields in anl.aida.client.net declared as CacheElement | |
| --- | --- |
| `private  CacheElement` | `NetTests.element` |

| Methods in anl.aida.client.net with parameters of type CacheElement | |
| --- | --- |
| `EdgeCreator` | `TFIDFEdgeCC.createEdgeCreator(CacheElement element, int docThreshold, float scoreThreshold)`             Creates an EdgeCreator from the specified parameters. |
| `EdgeCreator` | `TFEdgeCC.createEdgeCreator(CacheElement element, int docThreshold, float scoreThreshold)`             Creates an EdgeCreator from the specified parameters. |
| `EdgeCreator` | `SVEdgeCC.createEdgeCreator(CacheElement element, int docThreshold, float scoreThreshold)`             Creates an EdgeCreator from the specified parameters. |
| `EdgeCreator` | `OccurenceEdgeCC.createEdgeCreator(CacheElement element, int docThreshold, float scoreThreshold)`             Creates an EdgeCreator from the specified parameters. |
| `EdgeCreator` | `EdgeCreatorCreator.createEdgeCreator(CacheElement element, int docThreshold, float scoreThreshold)`             Creates an EdgeCreator from the specified parameters. |
| `anl.aida.score.TermScoreFilter` | `TSFilterCreator.createFilter(CacheElement element, float val)`             Creates a TermScoreFilter using the element and val. |
| `anl.aida.score.TermScoreFilter` | `TFIDFFilterCreator.createFilter(CacheElement element, float val)`             Creates a TermScoreFilter using the element and val. |
| `anl.aida.score.TermScoreFilter` | `TFFilterCreator.createFilter(CacheElement element, float val)`             Creates a TermScoreFilter using the element and val. |
| `anl.aida.score.TermScoreFilter` | `SimilarityFilterCreator.createFilter(CacheElement element, float val)`             Creates a TermScoreFilter using the element and val. |
| `anl.aida.score.TermScoreFilter` | `OccurrenceFilterCreator.createFilter(CacheElement element, float val)`             Creates a TermScoreFilter using the element and val. |

| Uses of CacheElement in anl.aida.query | |
| --- | --- |

| Fields in anl.aida.query declared as CacheElement | |
| --- | --- |
| `private  CacheElement` | `Frame.currentElement` |

| Methods in anl.aida.query that return CacheElement | |
| --- | --- |
| `CacheElement` | `Frame.getCurrentElement()` |

| Methods in anl.aida.query with parameters of type CacheElement | |
| --- | --- |
| `void` | `Frame.setCurrentElement(CacheElement element)` |

| Constructors in anl.aida.query with parameters of type CacheElement | |
| --- | --- |
| `Frame(Cache cache, CacheElement currentElement)` |

---


|  |  |  |  |  |  |  |  |  |  |  |
| --- | --- | --- | --- | --- | --- | --- | --- | --- | --- | --- |
| |  |  |  |  |  |  |  |  | | --- | --- | --- | --- | --- | --- | --- | --- | | **Overview** | **Package** | **Class** | **Use** | **Tree** | **Deprecated** | **Index** | **Help** | | |  |
| PREV   NEXT | **FRAMES**    **NO FRAMES**     **All Classes** |


---
