# Supplementary material
Source: MDPI journal article supplement (https://www.mdpi.com/2071-1050/2/5/1182)
Supplement: s1 [file s1 › Sustainability_Altaweel_EtAl/Client/docs/anl/aida/client/class-use/DocSetID.html]

Uses of Class anl.aida.client.DocSetID


---


|  |  |  |  |  |  |  |  |  |  |  |
| --- | --- | --- | --- | --- | --- | --- | --- | --- | --- | --- |
| |  |  |  |  |  |  |  |  | | --- | --- | --- | --- | --- | --- | --- | --- | | **Overview** | **Package** | **Class** | **Use** | **Tree** | **Deprecated** | **Index** | **Help** | | |  |
| PREV   NEXT | **FRAMES**    **NO FRAMES**     **All Classes** |


---


## **Uses of Class anl.aida.client.DocSetID**

| Packages that use DocSetID | |
| --- | --- |
| **anl.aida.client** |  |
| **anl.aida.client.doc** |  |
| **anl.aida.client.gui** |  |
| **anl.aida.client.net** |  |

| Uses of DocSetID in anl.aida.client | |
| --- | --- |

| Fields in anl.aida.client declared as DocSetID | |
| --- | --- |
| `private  DocSetID` | `WrappedDocSet.id` |
| `private  DocSetID` | `TempCacheDocSet.id` |
| `private  DocSetID` | `CacheElement.AllDocs.id` |

| Methods in anl.aida.client that return DocSetID | |
| --- | --- |
| `DocSetID` | `WrappedDocSet.getId()`             Gets the id of this document set. |
| `DocSetID` | `CacheDocumentSet.getId()`             Gets the id of this document set. |
| `DocSetID` | `TempCacheDocSet.getId()`             Gets the id of this document set. |
| `DocSetID` | `CacheElement.AllDocs.getId()` |

| Constructors in anl.aida.client with parameters of type DocSetID | |
| --- | --- |
| `CacheElement.AllDocs(DocSetID id, CacheElement element)` |
| `WrappedDocSet(DocSetID id, java.lang.String label, CacheDocumentSet set)` |

| Uses of DocSetID in anl.aida.client.doc | |
| --- | --- |

| Fields in anl.aida.client.doc declared as DocSetID | |
| --- | --- |
| `private  DocSetID` | `WrappedDocumentsModel.id` |
| `protected  DocSetID` | `AbstractDocumentsModel.id` |
| `static DocSetID` | `DocumentsModel.NO_ID` |

| Methods in anl.aida.client.doc that return DocSetID | |
| --- | --- |
| `DocSetID` | `WrappedDocumentsModel.getID()`             Gets the DocumentSetID for this model. |
| `DocSetID` | `DocumentsModel.getID()`             Gets the DocumentSetID for this model. |
| `DocSetID` | `AbstractDocumentsModel.getID()`             Gets the DocumentSetID for this model. |

| Constructors in anl.aida.client.doc with parameters of type DocSetID | |
| --- | --- |
| `AbstractDocumentsModel(DocSetID id, CacheElement element)` |
| `DefaultDocumentsModel(DocSetID id, CacheElement element)` |
| `SubsetDocumentsModel(DocSetID id, CacheElement element, java.util.List<anl.aida.core.DocumentID> docs)` |
| `WrappedDocumentsModel(DocSetID id, DocumentsModel model)` |

| Uses of DocSetID in anl.aida.client.gui | |
| --- | --- |

| Fields in anl.aida.client.gui declared as DocSetID | |
| --- | --- |
| `private  DocSetID` | `ClusterPanel.curId` |

| Fields in anl.aida.client.gui with type parameters of type DocSetID | |
| --- | --- |
| `private  java.util.Map<DocSetID,javax.swing.table.TableModel>` | `ConceptPanel.listMap` |
| `private  java.util.Map<DocSetID,CacheDocumentSet>` | `DocsTabPanel.setMap` |
| `private  java.util.Map<DocSetID,ClusterTableModel>` | `ClusterPanel.tableMap` |

| Methods in anl.aida.client.gui with parameters of type DocSetID | |
| --- | --- |
| `void` | `AIDAGui.addClusterDisplay(DocSetID id, Clusters<anl.aida.core.DocumentID> clusters, java.lang.String title)`             Adds a cluster display to the gui. |
| `private  int` | `DocsTabPanel.findIndex(DocSetID id)` |
| `boolean` | `DocsTabPanel.selectDocSet(DocSetID id)`             Selects the document view whose model has the specified id. |

| Uses of DocSetID in anl.aida.client.net | |
| --- | --- |

| Fields in anl.aida.client.net declared as DocSetID | |
| --- | --- |
| `private  DocSetID` | `ConceptGraph.docSetID` |

| Methods in anl.aida.client.net that return DocSetID | |
| --- | --- |
| `DocSetID` | `ConceptGraph.getDocSetID()` |

| Constructors in anl.aida.client.net with parameters of type DocSetID | |
| --- | --- |
| `ConceptGraph(java.lang.String title, DocSetID docSetID, edu.uci.ics.jung.graph.Graph<T,CGEdge> graph)` |

---


|  |  |  |  |  |  |  |  |  |  |  |
| --- | --- | --- | --- | --- | --- | --- | --- | --- | --- | --- |
| |  |  |  |  |  |  |  |  | | --- | --- | --- | --- | --- | --- | --- | --- | | **Overview** | **Package** | **Class** | **Use** | **Tree** | **Deprecated** | **Index** | **Help** | | |  |
| PREV   NEXT | **FRAMES**    **NO FRAMES**     **All Classes** |


---
