# Supplementary material
Source: MDPI journal article supplement (https://www.mdpi.com/2071-1050/2/5/1182)
Supplement: s1 [file s1 › Sustainability_Altaweel_EtAl/Client/docs/anl/aida/client/class-use/Keyword.html]

Uses of Interface anl.aida.client.Keyword


---


|  |  |  |  |  |  |  |  |  |  |  |
| --- | --- | --- | --- | --- | --- | --- | --- | --- | --- | --- |
| |  |  |  |  |  |  |  |  | | --- | --- | --- | --- | --- | --- | --- | --- | | **Overview** | **Package** | **Class** | **Use** | **Tree** | **Deprecated** | **Index** | **Help** | | |  |
| PREV   NEXT | **FRAMES**    **NO FRAMES**     **All Classes** |


---


## **Uses of Interface anl.aida.client.Keyword**

| Packages that use Keyword | |
| --- | --- |
| **anl.aida.algo** |  |
| **anl.aida.client** |  |
| **anl.aida.client.gui** |  |
| **anl.aida.client.net** |  |
| **anl.aida.plot** |  |

| Uses of Keyword in anl.aida.algo | |
| --- | --- |

| Subinterfaces of Keyword in anl.aida.algo | |
| --- | --- |
| `interface` | `ScoredKeyword`             Associates a keyword with a a score and document count. |

| Classes in anl.aida.algo that implement Keyword | |
| --- | --- |
| `private static class` | `DefaultConceptGenerator.ScoredKeywordImpl` |
| `class` | `DefaultScoredKeyword`             Default implementation of Concept |

| Fields in anl.aida.algo declared as Keyword | |
| --- | --- |
| `private  Keyword` | `DefaultScoredKeyword.keyword` |

| Fields in anl.aida.algo with type parameters of type Keyword | |
| --- | --- |
| `private  java.util.List<Keyword>` | `DefaultConceptGenerator.concepts` |

| Methods in anl.aida.algo with parameters of type Keyword | |
| --- | --- |
| `int` | `DefaultScoredKeyword.compareTo(Keyword o)` |
| `int` | `DefaultConceptGenerator.ScoredKeywordImpl.compareTo(Keyword o)` |

| Constructors in anl.aida.algo with parameters of type Keyword | |
| --- | --- |
| `DefaultConceptGenerator.ScoredKeywordImpl(Keyword word, anl.aida.core.MIFSTerm term)` |
| `DefaultScoredKeyword(int count, float score, Keyword keyword)` |

| Constructor parameters in anl.aida.algo with type arguments of type Keyword | |
| --- | --- |
| `DefaultConceptGenerator(java.util.Collection<Keyword> concepts, anl.aida.core.ScoredTermsCollection stc)`             Creates a DefaultConceptGenerator. |

| Uses of Keyword in anl.aida.client | |
| --- | --- |

| Classes in anl.aida.client that implement Keyword | |
| --- | --- |
| `class` | `DefaultKeyword`             Encapsulates an MIFS keyword as unformatted term and a display string. |

| Fields in anl.aida.client with type parameters of type Keyword | |
| --- | --- |
| `private  java.util.Map<java.lang.String,java.util.Set<Keyword>>` | `Keywords.keywords` |

| Methods in anl.aida.client that return types with arguments of type Keyword | |
| --- | --- |
| `java.util.Collection<Keyword>` | `Keywords.getAllKeywords()`             Gets all the keywords in every set. |
| `java.util.Collection<Keyword>` | `Keywords.getKeywords(java.lang.String keywordSet)`             Gets all the keywords in the specified set. |

| Methods in anl.aida.client with parameters of type Keyword | |
| --- | --- |
| `int` | `DefaultKeyword.compareTo(Keyword o)` |

| Uses of Keyword in anl.aida.client.gui | |
| --- | --- |

| Fields in anl.aida.client.gui with type parameters of type Keyword | |
| --- | --- |
| `private  java.util.List<Keyword>` | `VizPropertyBean.keywords` |
| `private  java.util.Collection<Keyword>` | `CreateTSWorker.keywords` |

| Methods in anl.aida.client.gui that return types with arguments of type Keyword | |
| --- | --- |
| `java.util.List<Keyword>` | `VizPropertyBean.getKeywords()` |

| Constructor parameters in anl.aida.client.gui with type arguments of type Keyword | |
| --- | --- |
| `CreateTSWorker(java.util.Collection<? extends Keyword> keywords, Cache cache, java.lang.Iterable<anl.aida.util.DateRange> ranges, javax.swing.JPanel panel)` |
| `VizPropertyBean(java.lang.String title, java.util.List<? extends Keyword> keywords)` |

| Uses of Keyword in anl.aida.client.net | |
| --- | --- |

| Fields in anl.aida.client.net with type parameters of type Keyword | |
| --- | --- |
| `private  java.util.List<Keyword>` | `NetTests.concepts` |

| Method parameters in anl.aida.client.net with type arguments of type Keyword | |
| --- | --- |
| `ConceptGraphBuilder` | `ConceptGraphBuilder.buildNodes(anl.aida.score.TermScoreFilter filter, java.util.List<? extends Keyword> keywords)`             Builds the nodes for the ConceptGraph using the specified filter. |

| Uses of Keyword in anl.aida.plot | |
| --- | --- |

| Methods in anl.aida.plot with parameters of type Keyword | |
| --- | --- |
| `private  void` | `CacheTimeSeriesParams.updateSeries(Keyword keyword, anl.aida.util.DateRange range, int docCount)` |

| Method parameters in anl.aida.plot with type arguments of type Keyword | |
| --- | --- |
| `static CacheTimeSeriesParams` | `CacheTimeSeriesParams.createParams(Cache cache, java.util.Collection<? extends Keyword> keywords, java.lang.Iterable<anl.aida.util.DateRange> ranges, ProgressListener<anl.aida.util.DateRange>... listeners)` |
| `private  void` | `CacheTimeSeriesParams.init(Cache cache, java.util.Collection<? extends Keyword> keywords, java.lang.Iterable<anl.aida.util.DateRange> ranges)` |

---


|  |  |  |  |  |  |  |  |  |  |  |
| --- | --- | --- | --- | --- | --- | --- | --- | --- | --- | --- |
| |  |  |  |  |  |  |  |  | | --- | --- | --- | --- | --- | --- | --- | --- | | **Overview** | **Package** | **Class** | **Use** | **Tree** | **Deprecated** | **Index** | **Help** | | |  |
| PREV   NEXT | **FRAMES**    **NO FRAMES**     **All Classes** |


---
