# Supplementary material
Source: MDPI journal article supplement (https://www.mdpi.com/2071-1050/2/5/1182)
Supplement: s1 [file s1 › Sustainability_Altaweel_EtAl/Client/docs/anl/aida/client/class-use/Keywords.html]

Uses of Class anl.aida.client.Keywords


---


|  |  |  |  |  |  |  |  |  |  |  |
| --- | --- | --- | --- | --- | --- | --- | --- | --- | --- | --- |
| |  |  |  |  |  |  |  |  | | --- | --- | --- | --- | --- | --- | --- | --- | | **Overview** | **Package** | **Class** | **Use** | **Tree** | **Deprecated** | **Index** | **Help** | | |  |
| PREV   NEXT | **FRAMES**    **NO FRAMES**     **All Classes** |


---


## **Uses of Class anl.aida.client.Keywords**

| Packages that use Keywords | |
| --- | --- |
| **anl.aida.algo** |  |
| **anl.aida.client** |  |
| **anl.aida.client.gui** |  |
| **anl.aida.client.io** |  |

| Uses of Keywords in anl.aida.algo | |
| --- | --- |

| Fields in anl.aida.algo declared as Keywords | |
| --- | --- |
| `private  Keywords` | `KeywordsConceptGeneratorProducer.keywords` |

| Constructors in anl.aida.algo with parameters of type Keywords | |
| --- | --- |
| `KeywordsConceptGeneratorProducer(Keywords keywords)`             Creates a KeywordsConceptGeneratorProducer that will produce concepts from all the keywords in the keywords collection. |
| `KeywordsConceptGeneratorProducer(Keywords keywords, java.lang.String keywordSet)`             Creates a KeywordsConceptGeneratorProducer that will produce concepts from the specified keyword set. |

| Uses of Keywords in anl.aida.client | |
| --- | --- |

| Fields in anl.aida.client declared as Keywords | |
| --- | --- |
| `private  Keywords` | `Cache.keywords` |
| `private  Keywords` | `CacheElement.keywords` |
| `private  Keywords` | `KeywordDocCountFilter.keywords` |

| Methods in anl.aida.client that return Keywords | |
| --- | --- |
| `Keywords` | `Cache.getKeywords()`             Gets the keywords associated with this cache. |
| `Keywords` | `CacheElement.getKeywords()`             Gets the keywords for this CacheElement. |

| Methods in anl.aida.client with parameters of type Keywords | |
| --- | --- |
| `void` | `CacheElement.setKeyword(Keywords keywords)`             Sets the keywords for this cache element. |
| `void` | `Cache.setKeywords(Keywords keywords)`             Sets the keywords for this cache. |

| Constructors in anl.aida.client with parameters of type Keywords | |
| --- | --- |
| `KeywordDocCountFilter(int minFreq, Keywords keywords)`             Creates a filter that filters based on keywords and minimum frequency. |

| Uses of Keywords in anl.aida.client.gui | |
| --- | --- |

| Methods in anl.aida.client.gui with parameters of type Keywords | |
| --- | --- |
| `void` | `ConceptPanel.reset(Keywords keywords)`             Reset with new keywords. |

| Uses of Keywords in anl.aida.client.io | |
| --- | --- |

| Fields in anl.aida.client.io declared as Keywords | |
| --- | --- |
| `private  Keywords` | `CacheFileReader.keywords` |

---


|  |  |  |  |  |  |  |  |  |  |  |
| --- | --- | --- | --- | --- | --- | --- | --- | --- | --- | --- |
| |  |  |  |  |  |  |  |  | | --- | --- | --- | --- | --- | --- | --- | --- | | **Overview** | **Package** | **Class** | **Use** | **Tree** | **Deprecated** | **Index** | **Help** | | |  |
| PREV   NEXT | **FRAMES**    **NO FRAMES**     **All Classes** |


---
