# Supplementary material
Source: MDPI journal article supplement (https://www.mdpi.com/2071-1050/2/5/1182)
Supplement: s1 [file s1 › Sustainability_Altaweel_EtAl/Client/docs/anl/aida/client/class-use/ShowDocViewOp.html]

Uses of Class anl.aida.client.ShowDocViewOp


---


|  |  |  |  |  |  |  |  |  |  |  |
| --- | --- | --- | --- | --- | --- | --- | --- | --- | --- | --- |
| |  |  |  |  |  |  |  |  | | --- | --- | --- | --- | --- | --- | --- | --- | | **Overview** | **Package** | **Class** | **Use** | **Tree** | **Deprecated** | **Index** | **Help** | | |  |
| PREV   NEXT | **FRAMES**    **NO FRAMES**     **All Classes** |


---


## **Uses of Class anl.aida.client.ShowDocViewOp**

| Packages that use ShowDocViewOp | |
| --- | --- |
| **anl.aida.client.net** |  |
| **anl.aida.plot** |  |
| **anl.aida.viz3d** |  |

| Uses of ShowDocViewOp in anl.aida.client.net | |
| --- | --- |

| Fields in anl.aida.client.net declared as ShowDocViewOp | |
| --- | --- |
| `protected  ShowDocViewOp` | `TSConceptGraphs.docOp` |

| Uses of ShowDocViewOp in anl.aida.plot | |
| --- | --- |

| Fields in anl.aida.plot declared as ShowDocViewOp | |
| --- | --- |
| `private  ShowDocViewOp` | `NodeSelector.docViewOp` |

| Uses of ShowDocViewOp in anl.aida.viz3d | |
| --- | --- |

| Fields in anl.aida.viz3d declared as ShowDocViewOp | |
| --- | --- |
| `private  ShowDocViewOp` | `NodeSelector.docViewOp` |

| Methods in anl.aida.viz3d that return ShowDocViewOp | |
| --- | --- |
| `ShowDocViewOp` | `NodeSelector.getDocViewOp(AIDAGui gui)` |

---


|  |  |  |  |  |  |  |  |  |  |  |
| --- | --- | --- | --- | --- | --- | --- | --- | --- | --- | --- |
| |  |  |  |  |  |  |  |  | | --- | --- | --- | --- | --- | --- | --- | --- | | **Overview** | **Package** | **Class** | **Use** | **Tree** | **Deprecated** | **Index** | **Help** | | |  |
| PREV   NEXT | **FRAMES**    **NO FRAMES**     **All Classes** |


---
