# Supplementary material
Source: MDPI journal article supplement (https://www.mdpi.com/2071-1050/2/5/1182)
Supplement: s1 [file s1 › Sustainability_Altaweel_EtAl/Client/docs/anl/aida/client/DefaultKeyword.html]

DefaultKeyword


---


|  |  |  |  |  |  |  |  |  |  |  |
| --- | --- | --- | --- | --- | --- | --- | --- | --- | --- | --- |
| |  |  |  |  |  |  |  |  | | --- | --- | --- | --- | --- | --- | --- | --- | | **Overview** | **Package** | **Class** | **Use** | **Tree** | **Deprecated** | **Index** | **Help** | | |  |
| **PREV CLASS**   **NEXT CLASS** | **FRAMES**    **NO FRAMES**     **All Classes** |
| SUMMARY: NESTED | FIELD | CONSTR | METHOD | DETAIL: FIELD | CONSTR | METHOD |


---


## anl.aida.client Class DefaultKeyword

```
java.lang.Object
  anl.aida.client.DefaultKeyword
```

**All Implemented Interfaces:**: Keyword, java.lang.Comparable<Keyword>

---

``` public class DefaultKeyword extends java.lang.Object implements Keyword ```

Encapsulates an MIFS keyword as unformatted term and
a display string.

---

| **Field Summary** | |
| --- | --- |
| `private  java.lang.String` | `displayString` |
| `private  java.lang.String` | `term` |


| **Constructor Summary** | |
| --- | --- |
| `DefaultKeyword(java.lang.String term, java.lang.String displayString)`             Creates a keyword. |


| **Method Summary** | |
| --- | --- |
| `int` | `compareTo(Keyword o)` |
| `java.lang.String` | `getLabel()`             Gets this Keyword's display string. |
| `java.lang.String` | `getTerm()`             Gets this Keyword's term text. |
| `java.lang.String` | `toString()` |

| **Methods inherited from class java.lang.Object** |
| --- |
| `clone, equals, finalize, getClass, hashCode, notify, notifyAll, wait, wait, wait` |

| **Field Detail** |
| --- |

### term

```
private java.lang.String term
```

---


### displayString

```
private java.lang.String displayString
```


| **Constructor Detail** |
| --- |

### DefaultKeyword

```
public DefaultKeyword(java.lang.String term,
                      java.lang.String displayString)
```

:   Creates a keyword.

    **Parameters:**: `term` - the keywords term text: `displayString` - the string to use when displaying the term


| **Method Detail** |
| --- |

### getTerm

```
public java.lang.String getTerm()
```

:   Gets this Keyword's term text.

    :   **Specified by:**: `getTerm` in interface `Keyword`
    :   **Returns:**: this Keyword's term text.

---


### getLabel

```
public java.lang.String getLabel()
```

:   Gets this Keyword's display string.

    :   **Specified by:**: `getLabel` in interface `Keyword`
    :   **Returns:**: this Keyword's display string.

---


### compareTo

```
public int compareTo(Keyword o)
```

:   **Specified by:**: `compareTo` in interface `java.lang.Comparable<Keyword>`

---


### toString

```
public java.lang.String toString()
```

:   **Overrides:**: `toString` in class `java.lang.Object`


---


|  |  |  |  |  |  |  |  |  |  |  |
| --- | --- | --- | --- | --- | --- | --- | --- | --- | --- | --- |
| |  |  |  |  |  |  |  |  | | --- | --- | --- | --- | --- | --- | --- | --- | | **Overview** | **Package** | **Class** | **Use** | **Tree** | **Deprecated** | **Index** | **Help** | | |  |
| **PREV CLASS**   **NEXT CLASS** | **FRAMES**    **NO FRAMES**     **All Classes** |
| SUMMARY: NESTED | FIELD | CONSTR | METHOD | DETAIL: FIELD | CONSTR | METHOD |


---
