# Supplementary material
Source: MDPI journal article supplement (https://www.mdpi.com/2071-1050/2/5/1182)
Supplement: s1 [file s1 › Sustainability_Altaweel_EtAl/Client/docs/anl/aida/client/doc/AbstractDocumentsModel.html]

AbstractDocumentsModel


---


|  |  |  |  |  |  |  |  |  |  |  |
| --- | --- | --- | --- | --- | --- | --- | --- | --- | --- | --- |
| |  |  |  |  |  |  |  |  | | --- | --- | --- | --- | --- | --- | --- | --- | | **Overview** | **Package** | **Class** | **Use** | **Tree** | **Deprecated** | **Index** | **Help** | | |  |
| PREV CLASS   **NEXT CLASS** | **FRAMES**    **NO FRAMES**     **All Classes** |
| SUMMARY: NESTED | FIELD | CONSTR | METHOD | DETAIL: FIELD | CONSTR | METHOD |


---


## anl.aida.client.doc Class AbstractDocumentsModel

```
java.lang.Object
  anl.aida.client.doc.AbstractDocumentsModel
```

**All Implemented Interfaces:**: DocumentsModel

**Direct Known Subclasses:**: DefaultDocumentsModel, SubsetDocumentsModel

---

``` public abstract class AbstractDocumentsModel extends java.lang.Object implements DocumentsModel ```

Abstract base class for a DocumentsModel.

---

| **Field Summary** | |
| --- | --- |
| `protected static simphony.util.messages.MessageCenter` | `center` |
| `private  java.lang.String` | `description` |
| `protected  CacheElement` | `element` |
| `protected  DocSetID` | `id` |
| `protected  anl.aida.core.KeywordGenerator` | `keyGen` |
| `private  java.util.Map<java.lang.String,java.lang.String[]>` | `keywordCache` |
| `protected  anl.aida.util.DateRange` | `range` |

| **Fields inherited from interface anl.aida.client.doc.DocumentsModel** |
| --- |
| `NO_ID` |


| **Constructor Summary** | |
| --- | --- |
| `AbstractDocumentsModel(DocSetID id, CacheElement element)` |


| **Method Summary** | |
| --- | --- |
| `java.lang.String` | `getDescription()`             Gets the description of the documents contained by this model. |
| `DocSetID` | `getID()`             Gets the DocumentSetID for this model. |
| `java.lang.String[]` | `getKeywords(java.lang.String docPath)`             Gets keywords for the document with the specified path. |
| `void` | `setDescription(java.lang.String description)`             Sets the description of the documents contained by this model. |

| **Methods inherited from class java.lang.Object** |
| --- |
| `clone, equals, finalize, getClass, hashCode, notify, notifyAll, toString, wait, wait, wait` |

| **Methods inherited from interface anl.aida.client.doc.DocumentsModel** |
| --- |
| `createDocumentSets, getSearchFilter` |

| **Field Detail** |
| --- |

### center

```
protected static final simphony.util.messages.MessageCenter center
```

---


### element

```
protected CacheElement element
```

---


### keyGen

```
protected anl.aida.core.KeywordGenerator keyGen
```

---


### keywordCache

```
private java.util.Map<java.lang.String,java.lang.String[]> keywordCache
```

---


### description

```
private java.lang.String description
```

---


### id

```
protected DocSetID id
```

---


### range

```
protected anl.aida.util.DateRange range
```


| **Constructor Detail** |
| --- |

### AbstractDocumentsModel

```
public AbstractDocumentsModel(DocSetID id,
                              CacheElement element)
```


| **Method Detail** |
| --- |

### getID

```
public DocSetID getID()
```

:   Gets the DocumentSetID for this model. This will return
    NO\_ID if this model s not associated with a DocumentSet.

    :   **Specified by:**: `getID` in interface `DocumentsModel`
    :   **Returns:**: the DocumentSetID for this model, or NO\_ID if this model is not associated with a DocumentSet.

---


### setDescription

```
public void setDescription(java.lang.String description)
```

:   Sets the description of the documents contained by this model.

    :   **Specified by:**: `setDescription` in interface `DocumentsModel`
    :   **Parameters:**: `description` - the description

---


### getDescription

```
public java.lang.String getDescription()
```

:   Gets the description of the documents contained by this model.

    :   **Specified by:**: `getDescription` in interface `DocumentsModel`
    :   **Returns:**: the description of the documents contained by this model.

---


### getKeywords

```
public java.lang.String[] getKeywords(java.lang.String docPath)
```

:   Gets keywords for the document with the specified path.

    :   **Specified by:**: `getKeywords` in interface `DocumentsModel`
    :   **Parameters:**: `docPath` - the path of the document to get keywords for **Returns:**: keywords for the document with the specified path.


---


|  |  |  |  |  |  |  |  |  |  |  |
| --- | --- | --- | --- | --- | --- | --- | --- | --- | --- | --- |
| |  |  |  |  |  |  |  |  | | --- | --- | --- | --- | --- | --- | --- | --- | | **Overview** | **Package** | **Class** | **Use** | **Tree** | **Deprecated** | **Index** | **Help** | | |  |
| PREV CLASS   **NEXT CLASS** | **FRAMES**    **NO FRAMES**     **All Classes** |
| SUMMARY: NESTED | FIELD | CONSTR | METHOD | DETAIL: FIELD | CONSTR | METHOD |


---
