# Supplementary material
Source: MDPI journal article supplement (https://www.mdpi.com/2071-1050/2/5/1182)
Supplement: s1 [file s1 › Sustainability_Altaweel_EtAl/Client/docs/anl/aida/client/doc/class-use/AbstractDocumentsModel.html]

Uses of Class anl.aida.client.doc.AbstractDocumentsModel


---


|  |  |  |  |  |  |  |  |  |  |  |
| --- | --- | --- | --- | --- | --- | --- | --- | --- | --- | --- |
| |  |  |  |  |  |  |  |  | | --- | --- | --- | --- | --- | --- | --- | --- | | **Overview** | **Package** | **Class** | **Use** | **Tree** | **Deprecated** | **Index** | **Help** | | |  |
| PREV   NEXT | **FRAMES**    **NO FRAMES**     **All Classes** |


---


## **Uses of Class anl.aida.client.doc.AbstractDocumentsModel**

| Packages that use AbstractDocumentsModel | |
| --- | --- |
| **anl.aida.client.doc** |  |

| Uses of AbstractDocumentsModel in anl.aida.client.doc | |
| --- | --- |

| Subclasses of AbstractDocumentsModel in anl.aida.client.doc | |
| --- | --- |
| `class` | `DefaultDocumentsModel`             Model class for the DocumentsView. |
| `class` | `SubsetDocumentsModel`             Model class for the DocumentsView that contains some subset of documents. |

---


|  |  |  |  |  |  |  |  |  |  |  |
| --- | --- | --- | --- | --- | --- | --- | --- | --- | --- | --- |
| |  |  |  |  |  |  |  |  | | --- | --- | --- | --- | --- | --- | --- | --- | | **Overview** | **Package** | **Class** | **Use** | **Tree** | **Deprecated** | **Index** | **Help** | | |  |
| PREV   NEXT | **FRAMES**    **NO FRAMES**     **All Classes** |


---
