# Supplementary material
Source: MDPI journal article supplement (https://www.mdpi.com/2071-1050/2/5/1182)
Supplement: s1 [file s1 › Sustainability_Altaweel_EtAl/Client/docs/anl/aida/client/doc/class-use/ClientDocument.html]

Uses of Class anl.aida.client.doc.ClientDocument


---


|  |  |  |  |  |  |  |  |  |  |  |
| --- | --- | --- | --- | --- | --- | --- | --- | --- | --- | --- |
| |  |  |  |  |  |  |  |  | | --- | --- | --- | --- | --- | --- | --- | --- | | **Overview** | **Package** | **Class** | **Use** | **Tree** | **Deprecated** | **Index** | **Help** | | |  |
| PREV   NEXT | **FRAMES**    **NO FRAMES**     **All Classes** |


---


## **Uses of Class anl.aida.client.doc.ClientDocument**

| Packages that use ClientDocument | |
| --- | --- |
| **anl.aida.client.doc** |  |
| **anl.aida.client.gui** |  |

| Uses of ClientDocument in anl.aida.client.doc | |
| --- | --- |

| Methods in anl.aida.client.doc that return ClientDocument | |
| --- | --- |
| `ClientDocument` | `SubsetDocumentsModel.DocIterator.next()` |
| `ClientDocument` | `DefaultDocumentsModel.DocIterator.next()` |

| Methods in anl.aida.client.doc that return types with arguments of type ClientDocument | |
| --- | --- |
| `java.lang.Iterable<ClientDocument>` | `SubsetDocumentsModel.DocSetsImpl.getDocuments(int index)` |
| `java.lang.Iterable<ClientDocument>` | `DocSets.getDocuments(int index)`             Gets the documents in this set. |
| `java.lang.Iterable<ClientDocument>` | `DefaultDocumentsModel.DocSetsImpl.getDocuments(int index)` |
| `java.util.Iterator<ClientDocument>` | `SubsetDocumentsModel.DocIterator.iterator()` |
| `java.util.Iterator<ClientDocument>` | `DefaultDocumentsModel.DocIterator.iterator()` |

| Uses of ClientDocument in anl.aida.client.gui | |
| --- | --- |

| Methods in anl.aida.client.gui with parameters of type ClientDocument | |
| --- | --- |
| `private  com.l2fprod.common.swing.JTaskPaneGroup` | `DocumentsView.createGroup(ClientDocument doc)` |

---


|  |  |  |  |  |  |  |  |  |  |  |
| --- | --- | --- | --- | --- | --- | --- | --- | --- | --- | --- |
| |  |  |  |  |  |  |  |  | | --- | --- | --- | --- | --- | --- | --- | --- | | **Overview** | **Package** | **Class** | **Use** | **Tree** | **Deprecated** | **Index** | **Help** | | |  |
| PREV   NEXT | **FRAMES**    **NO FRAMES**     **All Classes** |


---
