# Supplementary material
Source: MDPI journal article supplement (https://www.mdpi.com/2071-1050/2/5/1182)
Supplement: s1 [file s1 › Sustainability_Altaweel_EtAl/Client/docs/anl/aida/client/doc/class-use/DocSetOperation.html]

Uses of Interface anl.aida.client.doc.DocSetOperation


---


|  |  |  |  |  |  |  |  |  |  |  |
| --- | --- | --- | --- | --- | --- | --- | --- | --- | --- | --- |
| |  |  |  |  |  |  |  |  | | --- | --- | --- | --- | --- | --- | --- | --- | | **Overview** | **Package** | **Class** | **Use** | **Tree** | **Deprecated** | **Index** | **Help** | | |  |
| PREV   NEXT | **FRAMES**    **NO FRAMES**     **All Classes** |


---


## **Uses of Interface anl.aida.client.doc.DocSetOperation**

| Packages that use DocSetOperation | |
| --- | --- |
| **anl.aida.client** |  |
| **anl.aida.client.gui** |  |
| **anl.aida.client.net** |  |
| **anl.aida.viz** |  |

| Uses of DocSetOperation in anl.aida.client | |
| --- | --- |

| Classes in anl.aida.client that implement DocSetOperation | |
| --- | --- |
| `class` | `ShowDocViewOp`             DocSetOperation that will show the documents in the documents view. |

| Uses of DocSetOperation in anl.aida.client.gui | |
| --- | --- |

| Fields in anl.aida.client.gui declared as DocSetOperation | |
| --- | --- |
| `(package private)  DocSetOperation` | `DocOpsWidget.OpAction.op` |

| Methods in anl.aida.client.gui with parameters of type DocSetOperation | |
| --- | --- |
| `javax.swing.JButton` | `DocOpsWidget.addOp(DocSetOperation op, java.lang.String iconFile)`             Adds a DocSetOperation. |

| Constructors in anl.aida.client.gui with parameters of type DocSetOperation | |
| --- | --- |
| `DocOpsWidget.OpAction(DocSetOperation op)` |

| Uses of DocSetOperation in anl.aida.client.net | |
| --- | --- |

| Methods in anl.aida.client.net that return DocSetOperation | |
| --- | --- |
| `DocSetOperation` | `TSConceptGraphs.getDocSetOp(AIDAGui gui)`             Gets a DocSet operation for a Canvas that displays docs produced by this TSConceptGraphs. |

| Uses of DocSetOperation in anl.aida.viz | |
| --- | --- |

| Methods in anl.aida.viz with parameters of type DocSetOperation | |
| --- | --- |
| `javax.swing.JButton` | `Canvas2D.addDocOp(DocSetOperation op, java.lang.String iconFileName)` |

---


|  |  |  |  |  |  |  |  |  |  |  |
| --- | --- | --- | --- | --- | --- | --- | --- | --- | --- | --- |
| |  |  |  |  |  |  |  |  | | --- | --- | --- | --- | --- | --- | --- | --- | | **Overview** | **Package** | **Class** | **Use** | **Tree** | **Deprecated** | **Index** | **Help** | | |  |
| PREV   NEXT | **FRAMES**    **NO FRAMES**     **All Classes** |


---
