# Supplementary material
Source: MDPI journal article supplement (https://www.mdpi.com/2071-1050/2/5/1182)
Supplement: s1 [file s1 › Sustainability_Altaweel_EtAl/Client/docs/anl/aida/client/doc/class-use/DocSets.html]

Uses of Interface anl.aida.client.doc.DocSets


---


|  |  |  |  |  |  |  |  |  |  |  |
| --- | --- | --- | --- | --- | --- | --- | --- | --- | --- | --- |
| |  |  |  |  |  |  |  |  | | --- | --- | --- | --- | --- | --- | --- | --- | | **Overview** | **Package** | **Class** | **Use** | **Tree** | **Deprecated** | **Index** | **Help** | | |  |
| PREV   NEXT | **FRAMES**    **NO FRAMES**     **All Classes** |


---


## **Uses of Interface anl.aida.client.doc.DocSets**

| Packages that use DocSets | |
| --- | --- |
| **anl.aida.client.doc** |  |
| **anl.aida.client.gui** |  |

| Uses of DocSets in anl.aida.client.doc | |
| --- | --- |

| Classes in anl.aida.client.doc that implement DocSets | |
| --- | --- |
| `(package private)  class` | `DefaultDocumentsModel.DocSetsImpl` |
| `(package private)  class` | `SubsetDocumentsModel.DocSetsImpl` |

| Methods in anl.aida.client.doc that return DocSets | |
| --- | --- |
| `DocSets` | `WrappedDocumentsModel.createDocumentSets(int setSize)`             Creates a DocSets with each set of the specified size. |
| `DocSets` | `SubsetDocumentsModel.createDocumentSets(int setSize)`             Creates a DocSets with each set of the specified size. |
| `DocSets` | `DocumentsModel.createDocumentSets(int setSize)`             Creates a DocSets with each set of the specified size. |
| `DocSets` | `DefaultDocumentsModel.createDocumentSets(int setSize)`             Creates a DocSets with each set of the specified size. |

| Uses of DocSets in anl.aida.client.gui | |
| --- | --- |

| Fields in anl.aida.client.gui declared as DocSets | |
| --- | --- |
| `private  DocSets` | `DocumentsView.sets` |

---


|  |  |  |  |  |  |  |  |  |  |  |
| --- | --- | --- | --- | --- | --- | --- | --- | --- | --- | --- |
| |  |  |  |  |  |  |  |  | | --- | --- | --- | --- | --- | --- | --- | --- | | **Overview** | **Package** | **Class** | **Use** | **Tree** | **Deprecated** | **Index** | **Help** | | |  |
| PREV   NEXT | **FRAMES**    **NO FRAMES**     **All Classes** |


---
