# Supplementary material
Source: MDPI journal article supplement (https://www.mdpi.com/2071-1050/2/5/1182)
Supplement: s1 [file s1 › Sustainability_Altaweel_EtAl/Client/docs/anl/aida/client/doc/class-use/DocumentContainer.html]

Uses of Interface anl.aida.client.doc.DocumentContainer


---


|  |  |  |  |  |  |  |  |  |  |  |
| --- | --- | --- | --- | --- | --- | --- | --- | --- | --- | --- |
| |  |  |  |  |  |  |  |  | | --- | --- | --- | --- | --- | --- | --- | --- | | **Overview** | **Package** | **Class** | **Use** | **Tree** | **Deprecated** | **Index** | **Help** | | |  |
| PREV   NEXT | **FRAMES**    **NO FRAMES**     **All Classes** |


---


## **Uses of Interface anl.aida.client.doc.DocumentContainer**

| Packages that use DocumentContainer | |
| --- | --- |
| **anl.aida.client.net** |  |
| **anl.aida.viz** |  |

| Uses of DocumentContainer in anl.aida.client.net | |
| --- | --- |

| Subinterfaces of DocumentContainer in anl.aida.client.net | |
| --- | --- |
| `interface` | `CGEdge`             Interface for classes that implement an edge. |

| Classes in anl.aida.client.net that implement DocumentContainer | |
| --- | --- |
| `class` | `DefaultCGEdge`             Default implementation of CGEdge. |
| `class` | `TermNode`             A node in a concept graph. |

| Uses of DocumentContainer in anl.aida.viz | |
| --- | --- |

| Fields in anl.aida.viz with type parameters of type DocumentContainer | |
| --- | --- |
| `private  SelectionManager<DocumentContainer>` | `NodeDragSelectionHandler.selection` |
| `protected  SelectionManager<DocumentContainer>` | `NetworkDisplay.selection` |
| `private  SelectionManager<DocumentContainer>` | `EdgeSelectionHandler.selection` |

| Method parameters in anl.aida.viz with type arguments of type DocumentContainer | |
| --- | --- |
| `void` | `NodeDragSelectionHandler.addSelectionManager(SelectionManager<DocumentContainer> selection)` |
| `void` | `EdgeSelectionHandler.addSelectionManager(SelectionManager<DocumentContainer> selection)` |

---


|  |  |  |  |  |  |  |  |  |  |  |
| --- | --- | --- | --- | --- | --- | --- | --- | --- | --- | --- |
| |  |  |  |  |  |  |  |  | | --- | --- | --- | --- | --- | --- | --- | --- | | **Overview** | **Package** | **Class** | **Use** | **Tree** | **Deprecated** | **Index** | **Help** | | |  |
| PREV   NEXT | **FRAMES**    **NO FRAMES**     **All Classes** |


---
