# Supplementary material
Source: MDPI journal article supplement (https://www.mdpi.com/2071-1050/2/5/1182)
Supplement: s1 [file s1 › Sustainability_Altaweel_EtAl/Client/docs/anl/aida/client/doc/class-use/DocumentsModel.html]

Uses of Interface anl.aida.client.doc.DocumentsModel


---


|  |  |  |  |  |  |  |  |  |  |  |
| --- | --- | --- | --- | --- | --- | --- | --- | --- | --- | --- |
| |  |  |  |  |  |  |  |  | | --- | --- | --- | --- | --- | --- | --- | --- | | **Overview** | **Package** | **Class** | **Use** | **Tree** | **Deprecated** | **Index** | **Help** | | |  |
| PREV   NEXT | **FRAMES**    **NO FRAMES**     **All Classes** |


---


## **Uses of Interface anl.aida.client.doc.DocumentsModel**

| Packages that use DocumentsModel | |
| --- | --- |
| **anl.aida.client** |  |
| **anl.aida.client.doc** |  |
| **anl.aida.client.gui** |  |

| Uses of DocumentsModel in anl.aida.client | |
| --- | --- |

| Fields in anl.aida.client declared as DocumentsModel | |
| --- | --- |
| `private  DocumentsModel` | `WrappedDocSet.docsModel` |
| `private  DocumentsModel` | `TempCacheDocSet.model` |

| Methods in anl.aida.client that return DocumentsModel | |
| --- | --- |
| `DocumentsModel` | `WrappedDocSet.getDocumentsModel()`             Gets a DocumentsModel for the documents in this CacheDocumentSet. |
| `DocumentsModel` | `CacheDocumentSet.getDocumentsModel()`             Gets a DocumentsModel for the documents in this CacheDocumentSet. |
| `DocumentsModel` | `TempCacheDocSet.getDocumentsModel()`             Gets a DocumentsModel for the documents in this CacheDocumentSet. |
| `DocumentsModel` | `CacheElement.AllDocs.getDocumentsModel()` |

| Uses of DocumentsModel in anl.aida.client.doc | |
| --- | --- |

| Classes in anl.aida.client.doc that implement DocumentsModel | |
| --- | --- |
| `class` | `AbstractDocumentsModel`             Abstract base class for a DocumentsModel. |
| `class` | `DefaultDocumentsModel`             Model class for the DocumentsView. |
| `class` | `SubsetDocumentsModel`             Model class for the DocumentsView that contains some subset of documents. |
| `class` | `WrappedDocumentsModel`             Delegates DocumentsModel to a wrapped DocumentsModel but replaced the DocSetID. |

| Fields in anl.aida.client.doc declared as DocumentsModel | |
| --- | --- |
| `private  DocumentsModel` | `WrappedDocumentsModel.model` |

| Constructors in anl.aida.client.doc with parameters of type DocumentsModel | |
| --- | --- |
| `WrappedDocumentsModel(DocSetID id, DocumentsModel model)` |

| Uses of DocumentsModel in anl.aida.client.gui | |
| --- | --- |

| Fields in anl.aida.client.gui declared as DocumentsModel | |
| --- | --- |
| `private  DocumentsModel` | `DocumentsView.model` |
| `private  DocumentsModel` | `DocsTabPanel.model` |

| Methods in anl.aida.client.gui that return DocumentsModel | |
| --- | --- |
| `DocumentsModel` | `DocumentsView.getModel()`             Gets the model for this view. |

| Methods in anl.aida.client.gui with parameters of type DocumentsModel | |
| --- | --- |
| `void` | `AIDAGui.performSearch(java.lang.String query, DocumentsModel model, ProgressLayer pLayer)`             Searches the cache index using the specified query and places the results, if any in the documents panel. |
| `void` | `DocumentsView.reset(DocumentsModel model)` |

| Constructors in anl.aida.client.gui with parameters of type DocumentsModel | |
| --- | --- |
| `AIDAGui.SearchWorker(java.lang.String query, DocumentsModel model, ProgressLayer pLayer)` |

---


|  |  |  |  |  |  |  |  |  |  |  |
| --- | --- | --- | --- | --- | --- | --- | --- | --- | --- | --- |
| |  |  |  |  |  |  |  |  | | --- | --- | --- | --- | --- | --- | --- | --- | | **Overview** | **Package** | **Class** | **Use** | **Tree** | **Deprecated** | **Index** | **Help** | | |  |
| PREV   NEXT | **FRAMES**    **NO FRAMES**     **All Classes** |


---
