# Supplementary material
Source: MDPI journal article supplement (https://www.mdpi.com/2071-1050/2/5/1182)

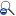

Supplement: s1 [file s1 › Sustainability_Altaweel_EtAl/Client/bin/anl/aida/gis/viewmag-.png]

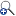

Supplement: s1 [file s1 › Sustainability_Altaweel_EtAl/Client/bin/anl/aida/gis/viewmag+.png]
